# Supplementary material for: Effectiveness of combined exercise and nutrition interventions in prefrail or frail older hospitalised patients: a systematic review and meta-analysis
Source: PubMed Central journal article supplement — BMJ Open. 2020 Dec 13;10(12):e040146. doi: 10.1136/bmjopen-2020-040146 (PMC7737105; doi:10.1136/bmjopen-2020-040146), 2020-12-13
Supplement: bmjopen-2020-040146.draft_revisions.pdf [file bmjopen-2020-040146.draft_revisions.pdf]

# BMJ Open

BMJ Open is committed to open peer review. As part of this commitment we make the peer review history of every article we publish publicly available.

When an article is published we post the peer reviewers' comments and the authors' responses online. We also post the versions of the paper that were used during peer review. These are the versions that the peer review comments apply to.

The versions of the paper that follow are the versions that were submitted during the peer review process. They are not the versions of record or the final published versions. They should not be cited or distributed as the published version of this manuscript.

BMJ Open is an open access journal and the full, final, typeset and author-corrected version of record of the manuscript is available on our site with no access controls, subscription charges or pay-per-view fees (<http://bmjopen.bmj.com>).

If you have any questions on BMJ Open's open peer review process please email [info.bmjopen@bmj.com](mailto:info.bmjopen@bmj.com)

# BMJ Open

## Effectiveness of combined exercise and nutrition interventions in pre-frail or frail older hospitalised patients: a systematic review and meta-analysis

|                               |                                                                                                                                                                                                                                                                                                                                                                                                                                                                                    |
|-------------------------------|------------------------------------------------------------------------------------------------------------------------------------------------------------------------------------------------------------------------------------------------------------------------------------------------------------------------------------------------------------------------------------------------------------------------------------------------------------------------------------|
| Journal:                      | <i>BMJ Open</i>                                                                                                                                                                                                                                                                                                                                                                                                                                                                    |
| Manuscript ID                 | bmjopen-2020-040146                                                                                                                                                                                                                                                                                                                                                                                                                                                                |
| Article Type:                 | Original research                                                                                                                                                                                                                                                                                                                                                                                                                                                                  |
| Date Submitted by the Author: | 07-May-2020                                                                                                                                                                                                                                                                                                                                                                                                                                                                        |
| Complete List of Authors:     | Han, chad Yixian; Flinders University College of Nursing and Health Sciences,<br>Miller, Michelle; Flinders University Faculty of Medicine Nursing and Health Sciences, Nutrition & Dietetics<br>Yaxley, Alison; Flinders University College of Nursing and Health Sciences<br>Baldwin, Claire; Flinders University College of Nursing and Health Sciences<br>Woodman, Richard; Flinders University, General Practice<br>Sharma, Yogesh; Flinders Medical Centre, General Medicine |
| Keywords:                     | GERIATRIC MEDICINE, REHABILITATION MEDICINE, NUTRITION & DIETETICS, GENERAL MEDICINE (see Internal Medicine)                                                                                                                                                                                                                                                                                                                                                                       |
|                               |                                                                                                                                                                                                                                                                                                                                                                                                                                                                                    |

SCHOLARONE™  
Manuscripts

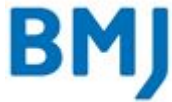

I, the Submitting Author has the right to grant and does grant on behalf of all authors of the Work (as defined in the below author licence), an exclusive licence and/or a non-exclusive licence for contributions from authors who are: i) UK Crown employees; ii) where BMJ has agreed a CC-BY licence shall apply, and/or iii) in accordance with the terms applicable for US Federal Government officers or employees acting as part of their official duties; on a worldwide, perpetual, irrevocable, royalty-free basis to BMJ Publishing Group Ltd ("BMJ") its licensees and where the relevant Journal is co-owned by BMJ to the co-owners of the Journal, to publish the Work in this journal and any other BMJ products and to exploit all rights, as set out in our [licence](#).

The Submitting Author accepts and understands that any supply made under these terms is made by BMJ to the Submitting Author unless you are acting as an employee on behalf of your employer or a postgraduate student of an affiliated institution which is paying any applicable article publishing charge ("APC") for Open Access articles. Where the Submitting Author wishes to make the Work available on an Open Access basis (and intends to pay the relevant APC), the terms of reuse of such Open Access shall be governed by a Creative Commons licence – details of these licences and which [Creative Commons](#) licence will apply to this Work are set out in our licence referred to above.

Other than as permitted in any relevant BMJ Author's Self Archiving Policies, I confirm this Work has not been accepted for publication elsewhere, is not being considered for publication elsewhere and does not duplicate material already published. I confirm all authors consent to publication of this Work and authorise the granting of this licence.

1  
2  
3 **Title Page**  
4

5  
6 2 Effectiveness of combined exercise and nutrition interventions in pre-frail or frail older  
7  
8 3 hospitalised patients: a systematic review and meta-analysis  
9

10  
11 **Authors:**  
12

13  
14 5 Chad Yixian Han<sup>1,2</sup> [chad.han@flinders.edu.au](mailto:chad.han@flinders.edu.au)  
15

16  
17 6 Michelle Miller<sup>1</sup>, [michelle.miller@flinders.edu.au](mailto:michelle.miller@flinders.edu.au)  
18

19  
20 7 Alison Yaxley<sup>1</sup>, [alison.yaxley@flinders.edu.au](mailto:alison.yaxley@flinders.edu.au)  
21

22  
23 8 Claire Baldwin<sup>1</sup>, [claire.baldwin@flinders.edu.au](mailto:claire.baldwin@flinders.edu.au)  
24

25  
26 9 Richard Woodman<sup>2</sup>, [richard.woodman@flinders.edu.au](mailto:richard.woodman@flinders.edu.au)  
27

28  
29 10 Yogesh Sharma<sup>3,4</sup> [yogesh.sharma@sa.gov.au](mailto:yogesh.sharma@sa.gov.au)  
30

31  
32 11 <sup>1</sup>Caring Futures Institute, College of Nursing and Health Sciences, Flinders University,  
33  
34 12 Australia; <sup>2</sup>Flinders Centre for Epidemiology and Biostatistics, Flinders University, Australia;  
35  
36 13 <sup>3</sup>College of Medicine and Public Health, Flinders University, Australia; <sup>4</sup>Department of  
37  
38 14 General Medicine, Flinders Medical Centre, Australia  
39  
40

41  
42 15 **Corresponding Author:** Chad Yixian Han, Caring Futures Institute, College of Nursing and  
43  
44 16 Health Sciences, Flinders University, Sturt Road, Bedford Park, SA5042, E-mail address:  
45  
46 17 [chad.han@flinders.edu.au](mailto:chad.han@flinders.edu.au), Tel.: +61 452091109  
47  
48

49  
50 18 **Keywords:** frail; pre-frail; older people; exercise; nutrition  
51

52  
53 19 **Word count:** 4246 (excluding abstract, references, tables, figures)  
54

55  
56 20 **PROSPERO registration:** CRD42020153934  
57  
58  
59  
60

1  
2  
3 22 **Abstract**  
4  
5

6 23 Objectives: To determine the effectiveness of combined exercise-nutrition interventions in pre-  
7  
8 24 frail/frail hospitalised older adults on frailty, frailty-related indicators, quality of life (QoL),  
9  
10 25 falls and its cost-effectiveness.

11  
12  
13 26 Design: Randomised controlled trials (RCTs) of combined exercise-nutrition interventions on  
14  
15 27 hospitalised pre-frail/frail older adults  $\geq 65$  years were collated from seven databases.  
16  
17 28 Methodological quality was appraised, and data were summarised descriptively or by meta-  
18  
19 29 analyses using a fixed effects model. Standardised mean difference (SMD) or mean difference  
20  
21 30 (MD) with 95% confidence intervals (CIs) was calculated.

22  
23  
24  
25  
26 31 Results: Twenty articles (11 RCTs) experimenting exercise-nutrition interventions on  
27  
28 32 hospitalised older adults were included. Nine articles were suitable for meta-analyses. One  
29  
30 33 study had low risk of bias and found improvements in physical performance and frailty-related  
31  
32 34 biomarkers. Exercise interventions were mostly supervised by a physiotherapist, focusing on  
33  
34 35 strength, ranging 2-5 times/week, of 20-90 minutes duration. Most nutrition interventions  
35  
36 36 involved education and supplementation but had dietitian supervision in only three studies.  
37  
38 37 Meta-analyses suggest that participants who received exercise-nutrition intervention had  
39  
40 38 greater reduction in frailty scores (n=3, SMD 0.25; 95% CI 0.03-0.46; P=0.02) and  
41  
42 39 improvement in short physical performance battery (SPPB) scores (n=3, MD 0.48; 95% CI  
43  
44 40 0.12-0.84; P=0.008) compared to standard care. Only chair-stand test (n=3) out of the three  
45  
46 41 SPPB components was significantly improved (MD 0.26; 95% CI 0.09-0.43; P=0.003).  
47  
48 42 Patients were more independent in activities of daily living in intervention groups, but high  
49  
50 43 heterogeneity was observed ( $I^2=96\%$ ,  $P<0.001$ ). The pooled effect for handgrip (n=3) +/- knee  
51  
52 44 extension muscle strength (n=4) was not statistically significant. Nutritional status, cognition,  
53  
54  
55  
56  
57  
58  
59  
60

1  
2  
3 45 biomarkers, QoL, falls and cost-effectiveness were summarised descriptively due to  
4  
5 46 insufficient data.  
6  
7

8 47 Conclusions: There is evidence, albeit weak, showing that exercise-nutrition interventions are  
9  
10 48 effective to improve frailty and frailty-related indicators in hospitalised older adults. Robust  
11  
12 49 research that pays attention to effect of assignment to intervention is needed to increase the  
13  
14 50 confidence in results.  
15  
16

17  
18 51 **PROSPERO registration number: CRD42020153934**  
19

## 20 21 52 **Strengths and limitations of study**

- 22  
23  
24 53 • This is the first comprehensive systematic review with meta-analysis on the  
25  
26 54 effectiveness of exercise-nutrition interventions on frailty and outcomes related to  
27  
28 55 frailty in hospitalised and pre-frail/frail older adults.
- 29  
30 56 • Only randomised controlled trials describing existing exercise-nutrition interventions  
31  
32 57 in frail older hospitalised patients were included.
- 33  
34 58 • There was a moderate risk of bias for most included studies such that the findings of  
35  
36 59 this review are inconclusive, making it difficult to draw firm conclusions.  
37  
38  
39

## 40 41 60 **Introduction**

42  
43  
44 61 Frailty is a major contributor to late-life disability as it leads to loss of independence.<sup>1</sup> It is also  
45  
46 62 associated with poor health outcomes, and, increased health-care costs and service use.<sup>1</sup> Frailty  
47  
48 63 has been defined for clinical research by Fried et al<sup>2</sup> as a combination of unintentional weight  
49  
50 64 loss, weakness, exhaustion, slowness and reduced physical activity. Older adults (aged >65  
51  
52 65 years) that have been classified as frail and are hospitalised, have a three-fold higher risk of  
53  
54 66 readmission or death, as compared to the younger population.<sup>3</sup> The management of older adults  
55  
56 67 who are frail has an incremental effect on health expenditures with an additional equivalent of  
57  
58  
59  
60

1  
2  
3 68 AU\$2400 per frail patient per year.<sup>4</sup> With 21% of the population over 65 years estimated to be  
4  
5 69 frail and 48% estimated to be pre-frail, concerns of economic impact are compounded by an  
6  
7  
8 70 ageing population.<sup>5</sup>  
9

10  
11 71 Exercise and nutrition are inextricably linked, in particular strength training can address  
12  
13 72 component issues of the frail phenotype.<sup>6</sup> Yet evidence supporting the effectiveness of  
14  
15 73 exercise-nutrition interventions for reversal of frailty is limited to community-dwelling older  
16  
17 74 adults.<sup>7</sup> In a study of community participants, a 3-month combined exercise-nutrition  
18  
19 75 intervention resulted in a significant reversal of frailty (reduction in Fried frailty score) at 6-  
20  
21 76 months, compared to the control group (between-group difference  $-0.34$ ; 95% confidence  
22  
23 77 interval [CI]  $-0.52$  to  $-0.16$ ;  $P < 0.001$ ).<sup>8</sup> The combination of exercise therapy and dietary  
24  
25 78 intervention in older adults who are frail, has also been reported to increase muscle strength  
26  
27 79 (knee extension between-group difference  $1.84$  kg, 95% CI  $0.17-3.51$ ,  $P = 0.03$ )<sup>9</sup> and improve  
28  
29 80 nutritional status (Mini Nutritional Assessment (MNA) Short Form between group difference  
30  
31 81  $1.4$ , 95% CI  $0.9-1.9$ ,  $P < 0.01$ ).<sup>10</sup>  
32  
33  
34  
35

36  
37 82 A recent meta-analysis suggested that although effective, exercise combined with nutrition was  
38  
39 83 not more effective in treating frailty than exercise alone.<sup>11</sup> However, the majority of included  
40  
41 84 studies were conducted in a community setting, with only 15% of older adults either  
42  
43 85 hospitalised or recruited from acute care settings. No study has systematically evaluated  
44  
45 86 evidence for interventions that commence during acute hospitalisation or early post discharge  
46  
47 87 (in the high-risk period for post-hospital syndrome).  
48  
49

50  
51 88 Hospitalisation is a vulnerable period, especially for older adults who are frail and therefore at  
52  
53 89 higher risk of functional loss,<sup>12</sup> malnutrition<sup>13, 14</sup> and further decline in frailty status.  
54  
55 90 Malnutrition is ubiquitous in older hospitalised patients with a prevalence as high as 50%.<sup>15</sup>  
56  
57 91 Since many domains of frailty are attributed to poor nutrition,<sup>16</sup> the effect of nutrition  
58  
59  
60

1  
2  
3 92 intervention when combined with exercise, may be more significant in the hospitalised  
4  
5 93 population.<sup>16</sup> Nutritional therapy extends beyond protein or nutrition supplementation as  
6  
7 94 reported in previous studies and may be more effective as part of individualised medical  
8  
9 95 nutrition therapies involving dietitians to improve diet adequacy.<sup>17</sup>  
10  
11  
12

13 96 This study aims to determine the effectiveness of combined exercise-nutrition interventions on  
14  
15 97 (1) frailty, (2) frailty-related indicators, falls, quality of life (QoL) and (3) its cost effectiveness  
16  
17 98 on pre-frail or frail hospitalised older adults.  
18  
19  
20

## 21 99 22 23 100 **Materials and Methods**

### 24 25 26 101 *Protocol and registration*

27  
28  
29 102 The protocol for this review was compliant with Cochrane systematic review guidelines,<sup>18</sup> and  
30  
31 103 registered with the International Prospective Register of Systematic Reviews (PROSPERO),  
32  
33 104 CRD42020153934. The study is reported according to Preferred Reporting Items for  
34  
35 105 Systematic Reviews and Meta-Analyses (PRISMA) guidelines.<sup>19</sup> Patients and/or members of  
36  
37 106 the public were not involved in this study.  
38  
39  
40

### 41 107 *Search methods*

42  
43  
44 108 Systematic searches of electronic databases (Medline, Emcare, CINAHL, Ageline, Scopus,  
45  
46 109 Cochrane and PEDro) were conducted by the lead author (CH) from inception until 10th  
47  
48 110 October 2019 using search strategies reviewed by an academic librarian (search queries  
49  
50 111 available in Supplementary file 1). Additionally, related citations to eligible items were  
51  
52 112 identified using the suggested related citation function in Pubmed. Reference lists of eligible  
53  
54 113 items were also screened.  
55  
56  
57  
58

### 59 114 *Inclusion and exclusion criteria*

60



1  
2  
3 115 The inclusion criteria were: 1) randomised controlled trials; 2) inclusion of pre-frail or frail  
4  
5 116 participants (as defined by study authors); 3) recruitment of older adult inpatients and/or those  
6  
7 117 hospitalised within the past 30 days of recruitment; 4) interventions that started while patients  
8  
9 118 were admitted and continued in the community/post-hospitalisation, or, commenced within 30  
10  
11 119 days of hospital discharge; 5) interventions that involved both physical exercises and  
12  
13 120 nutritional interventions (dietary modifications/education/training alone or combined with oral  
14  
15 121 nutrition supplementation); 6) measured frailty with an assessment tool or at least one indicator  
16  
17 122 relevant to frailty (nutritional status, physical function, cognitive function and mood, physical  
18  
19 123 activity level or biomarkers, falls and QoL and/or economic analysis of interventions. Studies  
20  
21 124 were excluded if they described protocols with no pilot outcomes, interventions delivered as a  
22  
23 125 part of a palliative care program, or interventions solely designed to facilitate discharge  
24  
25 126 planning (e.g. telephone support services, providing no pre-frailty or frailty intervention  
26  
27 127 element). Studies that recruited participants admitted following a mental health episode were  
28  
29 128 also excluded.  
30  
31  
32  
33  
34  
35

### 36 129 *Study selection and data extraction*

37  
38  
39 130 Covidence<sup>20</sup> was used to manage citations for title and abstract, and full-text screening, in  
40  
41 131 duplicate (CH and YS, supplement 1). The reviewers were unblinded to authors, journals and  
42  
43 132 countries of origin. Any disagreement was resolved through discussion or consensus opinion  
44  
45 133 with the other authors. A data extraction form was developed a priori by the research team,  
46  
47 134 such that two researchers (CH and YS) performed data extraction independently, on eligible  
48  
49 135 full-text articles. Where available, continuous data were extracted as (i) mean change with  
50  
51 136 standard deviation (SD), standard error of mean (SE) or 95% confidence interval (CI), or (ii)  
52  
53 137 mean or median values with SD, SE or interquartile range post intervention. If required data  
54  
55 138 were not reported within a publication (including change in means for outcomes of interest),  
56  
57 139 corresponding authors were emailed to request for it.  
58  
59  
60

### 140 *Quality of the studies*

141 The risk of bias in the individual studies was assessed by the Revised Cochrane risk-of-bias  
142 tool for randomised trials (RoB-2) by two researchers (CH and YS) independently.<sup>21</sup> Any  
143 disagreements were resolved by discussion or if required with consensus of a third reviewer.  
144 The Cochrane risk-of-bias tool is widely used to assess randomised controlled trials (RCT) for  
145 best practice.<sup>22</sup> Studies were given an overall risk-of-bias judgement of low, some concerns or  
146 high. Overall risk-of-bias was determined as having “some concerns” if any one of the risks of  
147 bias domains was rated as having “some concerns”. Likewise, studies were deemed to have an  
148 overall high risk of bias if any one domain had a high risk of bias.

### 149 *Data synthesis and statistical analyses*

150 Where possible, meta-analysis was performed; continuous outcome data were pooled and  
151 either mean difference (MD) or standardised mean difference (SMD) with 95% CI reported if  
152 there were two or more studies. Studies presenting SE were converted to SD via the conversion  
153 formula.<sup>18</sup> Fixed-effect meta-analyses were carried out with Cochrane Review Manager  
154 (RevMan) 5.3.<sup>23</sup> A P value of <0.05 was considered statistically significant. The variability  
155 between studies (heterogeneity) was assessed by I<sup>2</sup> and its 95% CI.<sup>24</sup> For studies with  
156 unobtainable missing, or incomparable data, results were qualitatively synthesised.

### 157 *Patient and public involvement*

158 No patients were involved in this study

159

## 160 **Results**

### 161 *Study selection*

1  
2  
3 162 The flow of studies through the review process is summarised in Figure 1. Twenty articles  
4  
5 163 reporting on 11 studies were eligible for data synthesis and analysis. Three of 11 studies  
6  
7 164 presented results from their cohort across separate publications. Firstly, Villareal et al<sup>25</sup>  
8  
9 165 reported on physical functioning outcomes with biomarker results in the publication of  
10  
11 166 Armamento-Villareal et al.<sup>26</sup> Secondly, Cameron et al<sup>27</sup> reported on frailty and some physical  
12  
13 167 function outcomes, with other physical function outcomes in a secondary publication<sup>28</sup> fall  
14  
15 168 rates<sup>29</sup> and cost-analysis in another.<sup>30</sup> Thirdly, Luger et al<sup>31</sup> reported on frailty and nutritional  
16  
17 169 status, with physical functioning outcomes across two other publications,<sup>32, 33</sup> fall efficacy<sup>34</sup>  
18  
19 170 and quality of life.<sup>35</sup> For clarity, the primary articles that report frailty or physical function  
20  
21 171 outcomes are cited for descriptive data in Tables 1-3 while individual articles are cited for  
22  
23 172 synthesis of outcome results.

### 24 173 *Study and sample characteristics*

25  
26 174 Details of study characteristics are available in Table 1. Across all studies, a total of 2307  
27  
28 175 participants were investigated. Most studies reported that patients were recruited from hospital  
29  
30 176 wards (n=7)<sup>27, 36-41</sup> while the other four studies<sup>25, 31, 42, 43</sup> included patients that were recruited  
31  
32 177 from hospital wards and community. Seven studies included only frail participants,<sup>25, 27, 38-41, 43</sup>  
33  
34 178 and the remaining four studies<sup>31, 36, 37, 42</sup> included frail, pre-frail and non-frail participants. The  
35  
36 179 Fried frailty phenotype criteria<sup>2</sup> were used most frequently to classify frailty (n=4).<sup>27, 36, 37, 42</sup>  
37  
38 180 with participants considered non-frail, pre-frail or frail if 0, 1-2, 3-5 criteria were present,  
39  
40 181 respectively. Luger et al used the Frailty Instrument for Primary Care of the Survey of Health,  
41  
42 182 Ageing, and Retirement in Europe (SHARE-FI)<sup>31</sup> which integrates components of exhaustion,  
43  
44 183 appetite, handgrip strength, walking difficulties and physical activity.<sup>44</sup> Five studies did not  
45  
46 184 report any assessment method to define frailty.<sup>38-41, 43</sup> One study used a combination of three  
47  
48 185 tools – modified Physical Performance Test, the measurement of VO<sub>2</sub> peak, and the Functional  
49  
50 186 Status Questionnaire.<sup>25</sup>

187 **Table 1.** Characteristics of included studies examining pre-frail or frail hospitalised older adults

| Study                                             | Country       | n   | Mean age                        | Study participants, characteristics                                                                                       | Recruitment site                      | Duration of intervention                  | Follow-up period | Frailty diagnostic tool/criteria used                                                                                      | Reported % of prefrail, frail                  |
|---------------------------------------------------|---------------|-----|---------------------------------|---------------------------------------------------------------------------------------------------------------------------|---------------------------------------|-------------------------------------------|------------------|----------------------------------------------------------------------------------------------------------------------------|------------------------------------------------|
| Arrieta <i>et al</i> , 2019 <sup>35</sup>         | France        | 302 | 76.7 ±5.0                       | Frail, onco-geriatric, older men & women; BMI: 26.1 ±4.6 kg/m <sup>2</sup> (UCG); 26.2 ±4.4 kg/m <sup>2</sup> (IG)        | Acute hospital                        | 1y                                        | 1y, 2y           | Fried frailty phenotype criteria                                                                                           | Non-frail: 73.6%<br>Frail: 26.4%               |
| Rodriguez-Manas <i>et al</i> , 2019 <sup>41</sup> | Spain         | 964 | 78.0 ±5.44                      | Frail older men and women with T2DM; BMI: 29.6 ±5.0 kg/m <sup>2</sup>                                                     | Acute hospitals or primary care sites | 4.5m (exercise), 3.5-4w (nutrition)       | 1y               | Fried frailty phenotype criteria                                                                                           | Pre-frail: 62.2%<br>Frail: 37.8%               |
| Niccoli <i>et al</i> , 2017 <sup>36</sup>         | Canada        | 47  | 81.3 ±1.0                       | Frail older men and women hospitalised patients; BMI: 26.4 ±6.6 kg/m <sup>2</sup> (UCG), 24.2 ±5.2 kg/m <sup>2</sup> (IG) | Acute hospital                        | Average LOS (days): 20.9 (UCG), 26.5 (IG) | Upon discharge   | Fried frailty phenotype criteria                                                                                           | Pre-frail: at least 87.8%<br>Frail: NR         |
| Luger <i>et al</i> , 2016 <sup>*30</sup>          | Austria       | 80  | 82.8 ±8.0                       | Frail older men and women; BMI: 27.2 ±4.3 kg/m <sup>2</sup>                                                               | Acute hospital and community          | 3m                                        | 3m               | SHARE-FI (female>0.315; male: >1.212 points)                                                                               | Non-frail: 1%<br>pre-frail: 35%,<br>frail: 64% |
| Milte <i>et al</i> , 2016 <sup>37</sup>           | Australia     | 175 | 83.0 ±6.2 (UCG), 82.4 ±5.7 (IG) | Frail older men and women post hip fracture, BMI: NR                                                                      | Acute hospital                        | 6m                                        | 6m               | NR                                                                                                                         | Frail: 100% as determined by study authors     |
| Cameron <i>et al</i> , 2013 <sup>†26</sup>        | Australia     | 241 | 83.3 ±5.9                       | Frail older men and women, BMI: 26.4 ±6.0 kg/m <sup>2</sup> (UCG) 26.1 ±5.9 kg/m <sup>2</sup> (IG)                        | Acute hospital                        | 1y                                        | 3m, 1y           | Fried frailty phenotype criteria                                                                                           | Frail: 100% as determined by study authors     |
| Singh <i>et al</i> , 2012 <sup>38</sup>           | Australia     | 124 | 79.3 ± 9.6                      | Frail older men and women; BMI: NR                                                                                        | Acute hospital                        | 1y                                        | 4m, 1y           | NR                                                                                                                         | Frail: 100% as determined by study authors     |
| Villareal <i>et al</i> , 2011 <sup>‡24</sup>      | United States | 107 | 69.3 ±4.1                       | Frail obese older men; BMI: 36.8 ±4.6 kg/m <sup>2</sup>                                                                   | Acute hospital and community          | 1y                                        | 6m, 1y           | ≥2 criteria: Modified PPT score 18–32; VO <sup>2</sup> peak of 11–18 ml/kg; difficulty in performing 2 IADL or 1 basic ADL | Mild-moderate frailty: 100%                    |

|                                                |           |     |               |                                                                                                                   |                              |                          |                       |                                                             |                                            |
|------------------------------------------------|-----------|-----|---------------|-------------------------------------------------------------------------------------------------------------------|------------------------------|--------------------------|-----------------------|-------------------------------------------------------------|--------------------------------------------|
| Azad <i>et al</i> , 2008 <sup>42</sup>         | Canada    | 91  | 74.2 and 75.8 | Frail CHF older women; BMI: NR                                                                                    | Acute hospital and community | 6 weeks                  | 6w, 6m                | Screened by a CHF coordinator, frailty assessment undefined | Frail: 100% as determined by study authors |
| Blanc-Bisson <i>et al</i> , 2008 <sup>39</sup> | France    | 76  | 85.4 ±6.6     | Frail older men and women; BMI: 24.0 ±5.1 kg/m <sup>2</sup>                                                       | Acute hospital               | Until clinical stability | Clinically stable, 1m | NR                                                          | Frail: 100% as determined by study authors |
| Miller <i>et al</i> , 2006 <sup>40</sup>       | Australia | 100 | 83.5 ±2.8     | Frail older men and women with LL fracture; BMI: 22.1 ±4.3 kg/m <sup>2</sup> (ACG), 23.2 ± kg/m <sup>2</sup> (IG) | Acute hospital               | 3m                       | 3m                    | NR                                                          | Frail: 100%                                |

Abbreviations: BMI, Body Mass Index; w, Weeks; m, Months; y, Years; VO<sup>2</sup> max, maximal oxygen uptake; PPT, physical performance test; IADL, Instrumental Activities of Daily Living; ADL, Activities of Daily Living; SHARE-FI, Survey of Health, Ageing and Retirement in Europe-Frailty Instrument; T2DM, Type 2 Diabetes Mellitus; CHF, Chronic Heart Failure; LL, Lower Limb, LOS, length of stay; IG, Intervention group; UCG, Usual care group; ACG, Attention control group; NR, not reported; BMI presented in Mean ±standard deviation  
 Multiple articles reported from same study, study chosen to represent other reports from the same study: \*Luger *et al*<sup>31</sup> – Haider *et al* 2017<sup>32</sup>, Winzer *et al* 2019<sup>33</sup>, Kapan *et al* 2017<sup>34</sup>, Kapan *et al* 2017<sup>35</sup>; †Cameron *et al* 2013<sup>27</sup> – Fairhall *et al* 2012<sup>28</sup>, Fairhall *et al* 2014<sup>29</sup>, Fairhall *et al* 2015<sup>30</sup>; ‡Villareal *et al* 2011<sup>25</sup> – Armamento-Villareal 2016<sup>26</sup>

**Table 2. Assessment of methodology quality of included studies using Cochrane Risk of Bias 2.0 tool**

| Study                                             | Cochrane Risk of Bias 2.0 tool assessment domains |                                        |                      |                            |                                  |         |
|---------------------------------------------------|---------------------------------------------------|----------------------------------------|----------------------|----------------------------|----------------------------------|---------|
|                                                   | Randomisation process                             | Deviations from intended interventions | Missing outcome data | Measurement of the outcome | Selection of the reported result | Overall |
| Arrieta <i>et al</i> , 2019 <sup>35</sup>         | +                                                 | ?                                      | ?                    | ?                          | +                                | ?       |
| Rodriguez-Manas <i>et al</i> , 2019 <sup>41</sup> | +                                                 | ?                                      | +                    | ?                          | +                                | ?       |
| Niccoli <i>et al</i> , 2017 <sup>36</sup>         | ?                                                 | ?                                      | +                    | ?                          | +                                | ?       |
| Luger <i>et al</i> , 2016 <sup>*30</sup>          | +                                                 | +                                      | +                    | ?                          | +                                | ?       |
| Milte <i>et al</i> , 2016 <sup>37</sup>           | +                                                 | ?                                      | +                    | +                          | +                                | ?       |
| Cameron <i>et al</i> , 2013 <sup>†26</sup>        | +                                                 | ?                                      | +                    | +                          | +                                | ?       |
| Singh <i>et al</i> , 2012 <sup>38</sup>           | +                                                 | ?                                      | +                    | —                          | +                                | —       |
| Villareal <i>et al</i> , 2011 <sup>‡24</sup>      | +                                                 | +                                      | +                    | +                          | +                                | +       |
| Azad <i>et al</i> , 2008 <sup>42</sup>            | +                                                 | ?                                      | +                    | ?                          | +                                | ?       |
| Blanc-Bisson <i>et al</i> , 2008 <sup>39</sup>    | +                                                 | ?                                      | +                    | ?                          | +                                | ?       |
| Miller <i>et al</i> , 2006 <sup>40</sup>          | +                                                 | ?                                      | +                    | +                          | +                                | ?       |

Key: + = Low risk of bias; ? = Some concerns of risk of bias; — = High risk of bias  
 \*Deviations from intended interventions (effect starting and adhering to intervention)  
 †Multiple articles reported from same study, study chosen to represent other reports from the same study: \*Luger *et al*<sup>31</sup> – Haider *et al* 2017<sup>32</sup>, Winzer *et al* 2019<sup>33</sup>, Kapan *et al* 2017<sup>34</sup>, Kapan *et al* 2017<sup>35</sup>; †Cameron *et al* 2013<sup>27</sup> – Fairhall *et al* 2012<sup>28</sup>, Fairhall *et al* 2014<sup>29</sup>, Fairhall *et al* 2015<sup>30</sup>; ‡Villareal *et al* 2011<sup>25</sup> – Armamento-Villareal 2016<sup>26</sup>

1  
2  
3 198 *Risk of bias within individual studies*  
4  
5

6 199 Table 2 outlines the risk of bias in individual studies. One study<sup>25</sup> had a low risk of bias and  
7  
8 200 one study had a high risk of bias (including unblinded secondary outcome assessment and  
9  
10 201 insufficient detail on standard care in control groups across recruitment sites). The other nine  
11  
12 202 studies<sup>27, 31, 36-38, 40-43</sup> were rated as having some concerns overall, of which five could have  
13  
14  
15 203 been improved in  $\geq 1$  domain. The remaining four studies<sup>27, 31, 39, 41</sup> that were rated as having  
16  
17 204 “some concerns” overall, had risk in only one domain with the most common reason being  
18  
19 205 failure to blind intervention/allocated group to participants. Examples of other concerns about  
20  
21 206 risk of bias included: assessors being aware of the group allocation<sup>31</sup> (measurement of  
22  
23 207 outcomes domain); or a lack of information about participants/researcher blinding to group  
24  
25 208 allocation.<sup>25, 27, 42</sup>  
26  
27  
28  
29

30 209 *Characteristics of exercise intervention component*  
31

32  
33 210 Characteristics of the exercise interventions used in studies are outlined in Table 3, and  
34  
35 211 included combinations of the following: supervised individual exercises (n=10),<sup>25, 27, 36-43</sup> group  
36  
37 212 exercises (n=3),<sup>25, 39, 43</sup> education including support with resources (digital versatile disc (DVD)  
38  
39 213 or visual aid instruction booklet, n=2),<sup>31, 36</sup> and motivational interviewing using a standardised  
40  
41 214 protocol (n=1).<sup>31</sup> Three studies<sup>37, 40, 42</sup> had inpatient only interventions, five<sup>36, 38, 39, 41, 43</sup> had  
42  
43 215 interventions that extended from inpatient to post-discharge, two<sup>27, 31</sup> studies offered the  
44  
45 216 intervention post-discharge only and one<sup>25</sup> did not report.  
46  
47  
48

49 217 In the majority of studies (n=9), the exercise component was delivered by a physiotherapist.<sup>25,</sup>  
50  
51 218 <sup>36-43</sup> Two studies used trained fitness instructors,<sup>36, 39</sup> and another engaged lay volunteers who  
52  
53 219 received training for the study.<sup>31</sup> All studies included strength exercises as part of their  
54  
55 220 interventions. Three studies described guidance on training intensity based on repetition  
56  
57 221 maximum's (RM) between 40-80%.<sup>25, 39, 42</sup> Other components of exercise programs included  
58  
59  
60

Table 3. Characteristics of exercise and nutrition intervention and controls of included studies

| Study                                             | Exercise intervention                                                                                                                                                                                                                                                                                                                                                                                                                                                                                                                                                                        | Nutrition intervention                                                                                                                                                                                                                                                                                                                                                                                                                | Control intervention                                                                                                                                                                                                                 |
|---------------------------------------------------|----------------------------------------------------------------------------------------------------------------------------------------------------------------------------------------------------------------------------------------------------------------------------------------------------------------------------------------------------------------------------------------------------------------------------------------------------------------------------------------------------------------------------------------------------------------------------------------------|---------------------------------------------------------------------------------------------------------------------------------------------------------------------------------------------------------------------------------------------------------------------------------------------------------------------------------------------------------------------------------------------------------------------------------------|--------------------------------------------------------------------------------------------------------------------------------------------------------------------------------------------------------------------------------------|
| Arrieta <i>et al</i> , 2019 <sup>35</sup>         | <p><b>Type:</b> <i>Strength</i> – Intensity range from low to high, starting at 10 repetition per exercise (<b>UL, LL</b>) with option of progressive loading</p> <p><i>Aerobic, Flexibility, Balance</i> – intensity individualised</p> <p><b>Frequency:</b> 2 sessions/week, duration per session NR + home exercises duration NR</p> <p><b>Setting:</b> Inpatient (supervised, individual) + post-discharge (unsupervised, individual)</p> <p><b>Additional support reported:</b> Phone consults (by trainer 2x/month for first 6 months then monthly for 1 year); Education resource</p> | <p><b>Self-guided education resource:</b> Provided with French National Nutrition Health Program education booklet - <i>Programme National Nutrition Santé</i> (PNNS)</p>                                                                                                                                                                                                                                                             | <p><b>Usual care:</b> NR, variable between study sites</p> <p><b>Self-guided education resource:</b> Provided with French National Nutrition Health Program education booklet - <i>Programme National Nutrition Santé</i> (PNNS)</p> |
| Rodriguez-Manas <i>et al</i> , 2019 <sup>41</sup> | <p><b>Type:</b> <i>Strength</i> – 40-80% of estimated 1RM, 8–10 repetitions (<b>LL</b>)</p> <p><b>Frequency:</b> 2-weeks pretraining followed by 16-week program of 2 days/week; 20-30 minutes/sessions</p> <p><b>Setting:</b> Inpatient (supervised, individual)</p>                                                                                                                                                                                                                                                                                                                        | <p><b>Nutrition consultation/education:</b> 7 educational sessions, each 45 minutes, delivered by a trained researcher or nutritional therapist, twice a week over 3.5-4 weeks. Therapy focused on behavioural change, nutrition optimisation and diabetes.</p>                                                                                                                                                                       | <p><b>Usual care:</b> usual health care from local health system and/or general practitioner</p>                                                                                                                                     |
| Niccoli <i>et al</i> , 2017 <sup>36</sup>         | <p><b>Type:</b> <i>Strength, Aerobic, Flexibility, Balance</i> – intensity and target muscle group individualised based on patient’s baseline assessment</p> <p><b>Frequency:</b> individualised based on patient’s baseline assessment</p> <p><b>Setting:</b> Inpatient (supervised, individual)</p>                                                                                                                                                                                                                                                                                        | <p><b>Supplements:</b> Daily ONS with 24g whey protein per day (<i>9g breakfast, 7.5g at lunch and dinner</i>) in addition to usual diet</p>                                                                                                                                                                                                                                                                                          | <p><b>Usual care:</b> usual medical care, no whey protein supplementation.</p> <p><b>Individual supervised exercise:</b> Individualised exercises as per intervention.</p>                                                           |
| Luger <i>et al</i> , 2016 <sup>*30</sup>          | <p><b>Type:</b> <i>Strength</i> –2 sets of 15 repetitions (<b>UL, LL</b>) until muscular exhaustion,</p> <p><b>Frequency:</b> 2x/week, &gt;30 minutes each session</p> <p><b>Setting:</b> Post-discharge (supervised, individual)</p> <p><b>Additional support reported:</b> Physical education (2-3 times/week, 30 minutes each session); Exercise education resource (demonstration DVD); Motivational interviewing.</p>                                                                                                                                                                   | <p><b>Nutrition consultation/education</b> Trained lay volunteers visit twice/week for dietary discussions aimed at achieving adequate energy, protein and other nutrients. Taught how to enrich food with protein, recipes, healthy for life plate which consists of food-cards and a play board.</p> <p><b>Motivational interviewing:</b> Techniques utilised with nutrition goal setting and tools to reinforce self-efficacy.</p> | <p><b>Usual care with attention control:</b> Trained lay "buddies" visit twice a week but doing a portfolio of possible activities (go out, have a chat, and sharing interest), especially cognitive training</p>                    |
| Milte <i>et al</i> , 2016 <sup>37</sup>           | <p><b>Type:</b> <i>Strength, Balance (Otago exercise program)</i> – Intensity and repetitions NR, at the discretion of the treating physiotherapist (<b>LL</b>)</p>                                                                                                                                                                                                                                                                                                                                                                                                                          | <p><b>Nutrition consultation/education:</b> Individualised nutrition therapy aimed at</p>                                                                                                                                                                                                                                                                                                                                             | <p><b>Usual care:</b> Usual rehabilitation program recommended during hospitalisation, social visits</p>                                                                                                                             |



|                                              |                                                                                                                                                                                                                                                                                                                                                                                                                                             |                                                                                                                                                                                                                                                                                                                                                                                                                                                                                     |                                                                                                                                                                                                                                     |
|----------------------------------------------|---------------------------------------------------------------------------------------------------------------------------------------------------------------------------------------------------------------------------------------------------------------------------------------------------------------------------------------------------------------------------------------------------------------------------------------------|-------------------------------------------------------------------------------------------------------------------------------------------------------------------------------------------------------------------------------------------------------------------------------------------------------------------------------------------------------------------------------------------------------------------------------------------------------------------------------------|-------------------------------------------------------------------------------------------------------------------------------------------------------------------------------------------------------------------------------------|
|                                              | <p><b>Frequency:</b> 3 times/week, 20-30minutes/session for 12 weeks</p> <p><b>Setting:</b> Inpatient (supervised, individual) + post-discharge (supervised, individual)</p>                                                                                                                                                                                                                                                                | <p>improving energy and protein intake to meet requirements by dietitian who visits fortnightly.</p> <p><b>Meal program:</b> ordered as deemed necessary by dietitian.</p> <p><b>Supplements:</b> commercial ONS recommended if needed by dietitian</p>                                                                                                                                                                                                                             | <p>weekly from trial staff and generic nutrition, exercise and falls prevention information</p>                                                                                                                                     |
| Cameron <i>et al</i> , 2013 <sup>†26</sup>   | <p><b>Type:</b> <i>Strength, Balance, Aerobic + WEBB program</i> – intensity and target muscle groups NR</p> <p><b>Frequency:</b> Exercises prescribed 3-5x/week (with 2 sessions for mobility training) for 1 year, supported by up to 10 home visits</p> <p><b>Setting:</b> Post-discharge (supervised, individual) + (unsupervised, individual)</p>                                                                                      | <p><b>Nutrition consultation/education:</b> Clinical evaluation of nutritional intake at home. A series of diet intervention as needed by dietitian.</p> <p><b>Meal program:</b> ordered as deemed necessary by dietitian.</p> <p><b>Supplements:</b> commercial ONS recommended if needed by dietitian</p>                                                                                                                                                                         | <p><b>Usual care:</b> usual health care during hospitalisation and from their general practitioner and community services after discharge</p>                                                                                       |
| Singh <i>et al</i> , 2012 <sup>38</sup>      | <p><b>Type:</b> <i>Strength</i> – 80% of most recent 1RM or RPE &lt;15, 3 sets of 8 repetitions (<b>UL, LL</b>)</p> <p><b>Frequency:</b> 2 sessions/week, session duration NR, over average of 80 sessions in 1 year, start as early as post assessment in hospital or at home.</p> <p><b>Setting:</b> Inpatient (supervised, individual) + (supervised, group-based)</p> <p><b>Additional support reported:</b> Monthly phone consults</p> | <p><b>Nutrition consultation/education:</b> Counselling on increase in diet quality, frequency NR</p> <p><b>Supplements:</b> ONS +/- dietary advice to increase daily energy (400-600 kcal) and protein (20 g/day) intake.</p> <p>For those calcium or vit-D deficient (52%), 12 months of vit-D orally (1000 IU/day) or calcium (1200 mg/d) and vit-D combination supplement</p> <p><b>Self-guided nutrition resource:</b> Food sources of calcium, vitamin D and sun exposure</p> | <p><b>Usual care:</b> standard service offered for hip fracture in the area health service, including orthogeriatric care, rehabilitation service, other medical and allied health consultation as required, and physiotherapy.</p> |
| Villareal <i>et al</i> , 2011 <sup>‡24</sup> | <p><b>Type:</b> <i>Strength</i> – 65% of 1RM; 8-12 repetitions of each exercise (<b>UL, LL</b>) with options for progression</p> <p><i>Aerobic</i>, ~65% of peak HR with gradual progression to 70-85%</p> <p><i>Flexibility, Balance</i></p> <p><b>Frequency:</b> 90 minutes, 3 sessions/week</p> <p><b>Setting:</b> Inpatient (supervised, group-based)</p>                                                                               | <p><b>Nutrition consultation/education:</b> prescribed a balanced diet with energy deficit of 500-750 kcal/d from daily energy requirement, 1 g of high-quality protein/kgbw/d. Weekly group consultation with dietitian for adjustments of their caloric intake, goals and behavioral therapy.</p> <p><b>Supplements:</b> 1500 mg of calcium/d day and ~1000 IU vitamin D/d</p>                                                                                                    | <p><b>Usual care:</b> General healthy lifestyle advice</p> <p><b>Supplements:</b> 1500 mg of calcium/d day and ~1000 IU vitamin D/d</p>                                                                                             |
| Azad <i>et al</i> , 2008 <sup>42</sup>       | <p><b>Type:</b> ‘Comprehensive exercise program’; type, intensity and target muscle groups NR</p> <p><b>Frequency:</b> 11 sessions over 6 weeks + NR home exercises</p> <p><b>Setting:</b> Inpatient (supervised, group-based), post-discharge (unsupervised, individual)</p>                                                                                                                                                               | <p><b>Nutrition consultation/education:</b> 3 sessions of individualized counselling about diet and nutrition in the management of CHF by dietitian</p>                                                                                                                                                                                                                                                                                                                             | <p><b>Usual care:</b> Optimal medical care</p>                                                                                                                                                                                      |



|                                                |                                                                                                                                                                                                                                                                                                                                                       |                                                                                                                                                                                                                                                                  |                                                                                                                                                                                                                                                                                              |
|------------------------------------------------|-------------------------------------------------------------------------------------------------------------------------------------------------------------------------------------------------------------------------------------------------------------------------------------------------------------------------------------------------------|------------------------------------------------------------------------------------------------------------------------------------------------------------------------------------------------------------------------------------------------------------------|----------------------------------------------------------------------------------------------------------------------------------------------------------------------------------------------------------------------------------------------------------------------------------------------|
| Blanc-Bisson <i>et al</i> , 2008 <sup>39</sup> | <p><b>Type:</b> <i>Strength</i> – intensity (RM) NR, 10 x repetitions each exercise (<b>LB</b>)</p> <p><b>Frequency:</b> 30 minutes, twice/day, five days/week</p> <p><b>Setting:</b> Inpatient (supervised, individual)</p>                                                                                                                          | <p><b>Meal program:</b> Geriatric hospital meals of 1800-2000 kcal/d</p> <p><b>Supplements:</b> 1 daily ONS of 200 kcal and 15g protein</p>                                                                                                                      | <p><b>Usual care:</b> From day 3 to 6, patients started to walk with human help with or without technical assistance in the physiotherapy room for three sessions per week until discharge.</p> <p><b>Individual supervised exercise:</b> Physiotherapy continued at home for one month.</p> |
| Miller <i>et al</i> , 2006 <sup>40</sup>       | <p><b>Type:</b> <i>Strength</i> – intensity (RM) NR, 2 sets of 8 repetitions (<b>LL</b>) with progressive loading, at the discretion of the treating physiotherapist</p> <p><b>Frequency:</b> 3 times/week, 20-30minutes/session for 12 weeks</p> <p><b>Setting:</b> Inpatient (supervised, individual) + Post-discharge (supervised, individual)</p> | <p><b>Nutrition consultation/education:</b> Individualised nutrition therapy by dietitian.</p> <p><b>Supplements:</b> single type of ONS to cover the shortfall between individual estimated energy and protein requirements and actual intake over 42 days.</p> | <p><b>Usual care with attention control group</b> - received tri-weekly visits weeks 1-6, then weekly visits 7-12 to account for the possibility of the attention effect.</p>                                                                                                                |

Abbreviations: *UL*, Upper Limb; *LL*, Lower Limb; *NR*, not reported; *HR*, Heart Rate; *CHF*, Chronic Heart Failure; *ONS*, Oral Nutrition Supplements, *RM*, Repetition Max; *DVD*, Digital Versatile Disc; *WEBB*, Weight-Bearing for Better Balance exercise program is designed to improve mobility, increase physical activity and prevent falls; *Otago exercise program* - series of 17 strength and balance at-home exercises for fall prevention program in frail older adults.

Multiple articles reported from same study, study chosen to represent other reports from the same study: \*Luger *et al*<sup>31</sup> – Haider *et al* 2017<sup>32</sup>, Winzer *et al* 2019<sup>33</sup>, Kapan *et al* 2017<sup>34</sup>, Kapan *et al* 2017<sup>35</sup>; †Cameron *et al* 2013<sup>27</sup> – Fairhall *et al* 2012<sup>28</sup>, Fairhall *et al* 2014<sup>29</sup>, Fairhall *et al* 2015<sup>30</sup>; \*Villareal *et al* 2011<sup>25</sup> – Armamento-Villareal 2016<sup>26</sup>

1  
2  
3 222 aerobic fitness,<sup>25, 27, 36, 37</sup> flexibility,<sup>25, 36, 37</sup> and/or balance.<sup>25, 27, 36, 37</sup> The frequency of  
4  
5 223 interventions ranged from two<sup>31, 36, 39, 42, 43</sup> to five<sup>27, 40</sup> sessions a week, lasting between 20<sup>38, 41,</sup>  
6  
7 224 <sup>42</sup> to 90 minutes<sup>25</sup> each. The duration of exercise intervention varied from six weeks<sup>43</sup> to one  
8  
9 225 year.<sup>25, 27, 36, 39</sup>

### 226 *Characteristics of nutrition intervention component*

16 227 Characteristics of the nutritional interventions used in studies, are outlined in Table 3, and  
17  
18 228 included combinations of the following: nutrition consultation/education (n=8),<sup>25, 27, 31, 38-41, 43</sup>  
19  
20 229 oral nutrition and/or multivitamin/mineral supplements (n=7),<sup>25, 27, 37-41</sup> meal programs  
21  
22 230 (n=3),<sup>27, 38, 40</sup> self-guided education materials (n=2),<sup>36, 39</sup> and motivational interviewing (n=1).<sup>31</sup>  
23  
24 231 The most common combination of nutrition intervention was consultation/education with oral  
25  
26 232 nutrition and/or multivitamin/mineral supplements (n=5).<sup>25, 38, 41, 43</sup> Five of nine nutrition  
27  
28 233 consultation/education interventions were performed by dietitians.<sup>25, 38, 41, 43</sup> Other studies used  
29  
30 234 trained lay volunteers,<sup>31</sup> a researcher/nutrition therapist or did not specify a skill set for who  
31  
32 235 delivered the consultation/education.<sup>42</sup>

37 236 All counselling/education-based interventions aimed to achieve adequate dietary targets for  
38  
39 237 energy, protein and other nutrients. One study on obese frail participants aimed for calorie  
40  
41 238 deficit but ensured that all achieved 1g/kg/day of protein in the intervention group.<sup>25</sup> The  
42  
43 239 reported frequency of consultations ranged from twice a week<sup>31, 42</sup> to fortnightly.<sup>38, 41</sup> Oral  
44  
45 240 nutrition supplements (ONS) were the most common supplements prescribed to intervention  
46  
47 241 group participants (n=7),<sup>25, 37, 38, 40, 41, 43</sup> typically providing 200-300kcal and 12-24g protein  
48  
49 242 per serve with a frequency of consumption up to seven times a week<sup>37, 40</sup> or as prescribed by  
50  
51 243 dietitians<sup>25, 38, 41, 43</sup> to cover any identified deficits between individually estimated energy and  
52  
53 244 protein requirements and actual intake. Calcium and vitamin D were the two most commonly  
54  
55 245 supplemented micronutrients<sup>25, 39</sup> at doses in the range of 1200-1500mg/d and 1000IU/d,  
56  
57  
58  
59  
60

246 respectively. Meal programs were either delivered as inpatient specialised geriatric meals  
247 providing 1800-2000kcal/d or home-delivered meal programs.<sup>27, 38, 40</sup>

#### 248 *Frailty outcomes*

249 Data on frailty outcomes were available for quantitative analysis from three studies.<sup>27, 31, 37</sup> The  
250 meta-analysis is presented in Figure 2 and suggested that participants who received exercise-  
251 nutrition intervention had a greater reduction in frailty score compared to those who received  
252 standard care (SMD 0.25; 95% CI 0.03-0.46; P=0.02); no heterogeneity was observed (I<sup>2</sup>=0%;  
253 P=0.58).

#### 254 *Physical functioning outcomes*

##### 255 *Short Physical Performance Battery (SPPB)*

256 Data on the SPPB were available for quantitative analysis from 3 studies,<sup>27, 42, 45</sup> with results  
257 from meta-analysis presented in Figure 3. Participants who received exercise-nutrition  
258 intervention had a statistically significant improvement in SPPB score, compared to those that  
259 received standard care (MD 0.48; 95% CI 0.12-0.84; P=0.008), with moderate heterogeneity<sup>18</sup>  
260 observed (I<sup>2</sup> = 52%; P=0.13).<sup>20, 32, 33</sup> The analysis of SPPB components across all studies  
261 showed no statistically significant differences in gait speed<sup>27, 37, 42, 45</sup> (MD 0.02; 95% CI -0.02  
262 to 0.06; P = 0.31; I<sup>2</sup> = 37%, P = 0.19) or balance<sup>27, 42, 45</sup> (MD 0.13; 95% CI -0.04 to 0.30; P=0.14;  
263 I<sup>2</sup>=0%, P =0.22) between groups. There were significantly greater improvements in chair stand  
264 test results<sup>27, 42, 45</sup> in the intervention group as compared to the control (MD 0.26; 95% CI 0.09-  
265 0.43; P=0.003; I<sup>2</sup> = 23%, P=0.23). Two studies that were not suitable for meta-analysis and are  
266 instead qualitatively described. Arrieta et al reported no significant differences between groups  
267 in the percentage of participants who had a  $\geq 1$  point decrease in SPPB score at one and two  
268 years (P=0.772, P=0.057, respectively).<sup>36</sup> With use of an alternative measure of physical  
269 function (modified physical performance test), Villareal et al<sup>25</sup> reported a significant

270 improvement in their exercise- nutrition interventions group as compared to exercise only  
271 (P=0.04), nutrition only (P<0.001), or controls.

### 272 Activities of daily living

273 Data on activities of daily living (ADL) from four studies<sup>28, 33, 39, 42</sup> underwent meta-analysis,  
274 from which participants who received exercise-nutrition intervention were determined to have  
275 greater ADL independence post-intervention than those who received standard care (SMD  
276 0.92; 95% CI 0.78-1.05 to 0.85; P<0.001, Figure 3). However, high heterogeneity was observed  
277 (I<sup>2</sup>=96%, P<0.001). Results from two studies<sup>40, 43</sup> were unable to be included meta-analysis  
278 (data unavailable).

### 279 Muscle strength

280 Meta-analysis showed no statistically significant differences in muscle strength between  
281 participants who received exercise-nutrition intervention and those that received standard care,  
282 when handgrip strength was analysed from three studies<sup>27, 37, 45</sup> (MD 0.46; 95% -0.38 to 0.85;  
283 P = 0.28; I<sup>2</sup> = 49%, P = 0.14), or, when of handgrip and quadriceps strength was combined  
284 (n=4 studies)<sup>27, 37, 42, 45</sup> using a published methodology<sup>46</sup> (SMD 0.10; 95% CI -0.09 to 0.29;  
285 P=0.24, I<sup>2</sup>=28%, P=0.30) (Figure 3).

### 286 Nutrition, Cognition and Biomarkers outcomes

287 Most studies assessed participants' nutritional status at baseline, while only one study<sup>31</sup>  
288 assessed it as an outcome. Luger et al reported a 1.54-point improvement in the MNA long  
289 form in participants who received exercise-nutrition intervention compared to those who  
290 received standard care (95% CI 0.51-2.56, P=0.004). Combined exercise-nutrition intervention  
291 did not affect cognitive status (mini-mental state examination (MMSE)) or mood (geriatric  
292 depression scale (GDS)).<sup>43</sup> Armamento-Villareal et al reported a significant decrease in total  
293 and free estradiol in their frail obese older men (attributed to weight loss from lifestyle change

1  
2  
3 294 rather than the intervention), without a clinically meaningful increase in total or free  
4  
5 295 testosterone levels.<sup>26</sup> In one study that reported C-reactive protein (CRP) levels, this  
6  
7  
8 296 inflammatory marker remained stable in the exercise-nutrition intervention group participants,  
9  
10 297 compared to an increase in the social support control group at the end of 12 weeks (P=0.04).<sup>47</sup>  
11  
12

### 13 298 Quality of life and falls

14  
15  
16 299 Three studies<sup>30, 35, 38</sup> that evaluated quality of life could not find statistically significant  
17  
18 300 improvement in the intervention as compared to the control group though Milte et al<sup>38</sup> found a  
19  
20 301 trend favouring intervention. Fairhall et al<sup>29</sup> found that risk factors related to falls (physical  
21  
22 302 tests as mentioned above) but not rate of falls were reduced while Kapan et al<sup>34</sup> found that a  
23  
24 303 10% reduction in fear of falling as ascertained by the falls efficacy scale.  
25  
26  
27  
28 304

### 29 305 Economic analyses

30  
31  
32  
33 306 Only two studies examined the cost-effectiveness of their exercise-nutrition intervention.  
34  
35 307 Fairhall et al<sup>30</sup> reported no additional resource cost in terms of medical (P=0.87) or nursing and  
36  
37 308 health professional appointments (P=0.32). Similarly, Milte et al<sup>38</sup> reported no cost differences  
38  
39 309 between groups (P=0.868).  
40  
41  
42  
43 310

## 44 311 **Discussion**

### 45 312 *Main findings*

46  
47  
48 313 The present systematic review and meta-analysis present updated evidence that suggest  
49  
50 314 exercise with nutrition intervention to be effective on frailty and frailty-related physical  
51  
52 315 outcomes in hospitalised older adult patients. When compared to standard care, combined  
53  
54 316 exercise-nutrition interventions improved frailty status as determined by the Fried Frailty  
55  
56 317 criteria<sup>2</sup> and the SHARE-FI.<sup>44</sup> They also improved physical function according to the SPPB  
57  
58  
59  
60

1  
2  
3 318 and ADLs. One study found significant improvement in nutrition score.<sup>31</sup> The two economic  
4  
5 319 analyses included in this review suggested that combined exercise-nutrition interventions,  
6  
7 320 though more effective, were no more costly than standard care.

8  
9  
10 321 Existing reviews of exercise and nutrition interventions have highlighted heterogeneity in study  
11  
12 322 protocols (including intervention descriptions), which limits potential for meta-analysis. They  
13  
14 323 have also focussed on community dwelling participants.<sup>48</sup> This study is novel in reviewing a  
15  
16 324 more vulnerable hospitalised population that has not been previously investigated, and  
17  
18 325 specifically targeting pre-frail or frail older adults. However, only three studies in this review  
19  
20 326 used a validated assessment tool and were included in the meta-analysis of frailty as an  
21  
22 327 outcome. This could be because the frailty phenotype was first described 2001, with a  
23  
24 328 systematic evaluation of frailty tools a decade later.<sup>2, 49</sup> Accordingly, the authors decided to  
25  
26 329 additionally evaluate frailty components such as physical function, nutrition, cognition and  
27  
28 330 biomarkers as baseline and outcome measures. Although not specific to frailty, these measures  
29  
30 331 provide insights to the effectiveness of exercise-nutrition interventions on improving various  
31  
32 332 components of frailty and may inform future studies.

33  
34 333 Previous reviews have found mixed results<sup>48</sup> or have concluded that evidence for combined  
35  
36 334 interventions is limited but increasing.<sup>50</sup> Our results concur with RCTs of exercise-nutrition  
37  
38 335 interventions conducted in community dwelling frail older adults. Tarazona-santabalbina and  
39  
40 336 colleagues found significant improvement in SPPB in participants on an exercise-nutrition  
41  
42 337 intervention as compared to controls in a community dwelling frail population – intervention  
43  
44 338 group  $9.5 \pm 1.8$  vs control group  $7.1 \pm 2.8$ ,  $P=0.007$ .<sup>51</sup> Similarly, Kim et al reported a community-  
45  
46 339 based study of frail older adults that found SPPB to remain stable in the intervention group,  
47  
48 340 while it decreased by 12.5% (1 point) in controls ( $P=0.039$ ).<sup>52</sup> Our meta-analysis of individual  
49  
50 341 components of the SPPB suggest that the significant improvements in functional muscle  
51  
52 342 strength as represented by the chair stand component of the SPPB may be pivotal to the increase

1  
2  
3 343 in overall SPPB post intervention, and reflect the functional lower limb strength training focus  
4  
5 344 of the exercise interventions. However, the meta-analysis of handgrip +/- quadriceps strength  
6  
7 345 did not produce a similar trend. Diversity in outcome measures for frailty and frailty-related  
8  
9 346 domains like physical function is a challenge for comparative analyses between studies. Future  
10  
11 347 studies should carefully consider measure responsiveness when selecting outcome tools.  
12  
13  
14

15 348 Nutrition is another important domain within frailty. Yet the majority of studies included in  
16  
17 349 this review only reported nutrition status at baseline, with only one study reporting follow-up  
18  
19 350 nutrition assessment at the end of the intervention.<sup>31</sup> Luger et al described an improvement in  
20  
21 351 nutrition status in a sample of at risk malnourished pre-frail/frail patients (thus likely to benefit  
22  
23 352 most from nutrition therapy). As hospitalised patients have greater energy deficits due to  
24  
25 353 catabolic stress of acute illness, they are a population that requires careful determination of  
26  
27 354 energy/protein requirements and in whom additive effects of nutrition supplementation to  
28  
29 355 exercise may have greatest impact on outcomes such as muscle strength.<sup>51</sup> As none of the  
30  
31 356 studies in the present review reported on energy deficits, it is not known whether these patients  
32  
33 357 received adequate replacement. Nutrition supplementation should also not be confused with  
34  
35 358 nutrition or diet modifications. The provision of ONS alone is unlikely to augment diet  
36  
37 359 adequacy as completely as diet modification that involves a wider range of nutrients and non-  
38  
39 360 nutrients<sup>53</sup> especially when led by dietitians.<sup>54, 55</sup>  
40  
41  
42  
43  
44  
45

46 361 For both exercise and nutrition based interventions, an understanding of patient participation  
47  
48 362 dynamics and compliance is required because of how they can impact on effectiveness.<sup>56</sup> Only  
49  
50 363 five studies in this review reported attendance to program/home visits or phone calls or  
51  
52 364 adherence to prescribed exercise/diet or related advice at rates of 50-90% and 70-93% for  
53  
54 365 nutrition and exercise interventions, respectively. Issues with participants resulting in poorer  
55  
56 366 compliance were not reported in these articles, such that the authors recommend that future  
57  
58 367 studies explore barriers and enablers to adherence in multi-modal interventions.  
59  
60



1  
2  
3 368 Cognition is another critical domain in the multidimensional nature of frailty. Exercise<sup>57</sup> and  
4  
5 369 nutrition interventions<sup>58</sup> may have a far reaching, positive effect on cognition in older adults.  
6  
7  
8 370 However, there was no evidence of an impact on cognition from a single study<sup>41</sup> in the present  
9  
10 371 review. This is consistent with a network meta-analysis of 13 RCTs that examined exercise and  
11  
12 372 nutrition interventions in frail older adults.<sup>11</sup> One suggested explanation is that different  
13  
14 373 neuronal mechanisms could result in a misfit between combinatory approaches of nutrition and  
15  
16 374 physical interventions<sup>59</sup> highlighting that more in-depth research is required.<sup>60</sup>  
17  
18  
19  
20 375 The economic delivery of new interventions and models of care is important to a range of  
21  
22 376 stakeholders<sup>61</sup> but has been infrequently conducted in previous studies.<sup>48</sup> In this review, only  
23  
24 377 two out of 11 studies included an economic analysis, with the majority of costs coming from  
25  
26 378 delivery of exercise and nutrition support. The types of consumables that were considered in  
27  
28 379 analyses included nutrition supplements, ankle/wrist weights, mobility aids and medications.  
29  
30 380 Elements of service provision that were considered included community, rehabilitation,  
31  
32 381 residential and transition care service use, which were often reduced and contributed to the net  
33  
34 382 result. The results of this review support previous findings of beneficial effects on frailty-  
35  
36 383 related outcomes, without increased costs.<sup>48</sup> However, results should be interpreted with  
37  
38 384 caution as omission of other services (such as medication reviews) within a multimodal  
39  
40 385 intervention can impact costings, and there are instances where interventions have not been  
41  
42 386 found to be more-cost effective than usual care.<sup>62</sup> The approach of streamlining and  
43  
44 387 reorganising existing services rather than creating entirely new systems may be preferred.

### 388 *Strength and weakness*

389 This study was robust and underwent peer review by an academic librarian. We did not have a  
390 language restriction on the search, and we did not find nor include studies in other languages.



1  
2  
3 391 We chose to use of an updated version of the Cochrane risk of bias tool (RoB 2), which  
4  
5 392 addresses issues of confusion common to its first version.  
6  
7

8 393 By focussing on exercise-nutrition interventions only, this study addresses a gap as identified  
9  
10 394 in a recent review of multi-domain interventions in pre-frail or frail elderly adults, in which  
11  
12 395 some interventions may have been be too broad to directly impact frailty, and functional and  
13  
14 396 cognitive status.<sup>50</sup> Multidisciplinary team based approaches remain recommended and are a  
15  
16 397 bedrock of quality standard care; they may also already include goals for exercise and nutrition  
17  
18 398 such that it may be difficult to solely attribute outcomes to a targeted but supplementary  
19  
20 399 exercise-nutrition program. Social relationships affect health behaviour and physical health,<sup>63</sup>  
21  
22 400 such that intervention benefits may in part come from social interactions. Nevertheless, several  
23  
24 401 studies<sup>27, 31, 41</sup> have demonstrated significant improvements even when control participants are  
25  
26 402 provided with the social aspect of an intervention, such that exercise and nutrition are expected  
27  
28 403 to improve outcomes independent of social interactions.  
29  
30  
31  
32  
33

#### 34 404 *Implications and future research*

35  
36  
37 405 This review is a useful resource for researchers and multi-disciplinary clinicians who are  
38  
39 406 seeking to generate evidence or evaluate their practices of exercise-nutrition interventions for  
40  
41 407 frail hospitalised older adults. The authors interpretation of the quality of studies in this review  
42  
43 408 is that the evidence base is low, but the inclusion of future studies may change estimates of the  
44  
45 409 intervention effects. While blinding of participants to the intervention is acknowledged to be  
46  
47 410 difficult, future studies should be adequately powered, use allocation concealment with  
48  
49 411 blinding outcome assessors and data analysts at least. Improved reporting of intervention  
50  
51 412 details is also required,<sup>64</sup> which may assist in answering research questions around the optimal  
52  
53 413 duration, dose, modality and timing of intervention(s) across the hospital to community  
54  
55 414 continuum. In the present review, potential beneficial effects of combined interventions could  
56  
57  
58  
59  
60

1  
2  
3 415 have been negated given the short durations reported by most studies. Thus, future studies may  
4  
5 416 be extended for >6-12 months, or employ principles of chronic condition self-management,<sup>65</sup>  
6  
7 417 to determine delayed improvements and achieve long-lasting sustainability of interventions.  
8  
9 418 There are many ongoing research activities relevant to the scope of this review,<sup>66-69</sup> yet only  
10  
11 419 one has reported plans for economic analysis in the study protocol.<sup>66</sup> Economic evaluations can  
12  
13 420 expand current evidence on the sustainability of incorporating such services within resource-  
14  
15 421 constrained healthcare systems.

## 422 *Conclusion*

423 Exercise-nutrition interventions that start while patients are admitted to hospital and continue  
424 in the community/post-hospital, or, commence early post discharge, appear to be effective in  
425 reducing frailty and some frailty-related physical indicators. Though effective, the quality of  
426 the evidence in this review is low as most studies included had some concerns for risk of bias.  
427 Given the paucity of high-quality studies on the effectiveness of combined exercise-nutrition  
428 interventions on hospitalised frail older adult patients, more robust research that pays attention  
429 to effect of assignment to intervention is needed to increase the confidence in results.

## 430 **Acknowledgements**

431 The authors would like to thank the librarians at Gus Fraenkel Medical Library, Flinders  
432 University for their support with the study.

## 433 **Author Contributions**

434 All authors contributed to the conception and design of review. CH and YS read and screened  
435 titles and abstract of potentially relevant studies. CH and YS evaluated the selected studies and  
436 performed data extraction. CH, MM, AY, CB reviewed the evidence. RW provided statistical  
437 expertise on meta-analyses. CH drafted the article and all authors provided critical revisions  
438 and final approval of the manuscript. All authors had access to the data in the study and can

1  
2  
3 439 take responsibility for the integrity of the reported findings. All authors fulfil the ICMJE criteria  
4  
5 440 for authorship.  
6  
7

#### 8 441 **Funding**

10  
11 442 This research received no specific grant from any funding agency in the public, commercial or  
12  
13 443 not-for-profit sectors. CH is supported by the Australian Government Research Training  
14  
15  
16 444 Program scholarship.  
17

#### 18 19 445 **Competing interests**

20  
21  
22 446 None declared.  
23  
24

#### 25 447 **Patient consent**

26  
27  
28 448 Not required.  
29  
30

#### 31 449 **Data sharing statement**

32  
33  
34 450 Details of the excluded papers are available from the corresponding author upon request.  
35  
36

#### 37 451 **References**

- 38  
39  
40 452 1. Le Cossec C, Perrine AL, Beltzer N, Fuhrman C, Carcaillon-Bentata L. Pre-Frailty,  
41 453 Frailty, and Multimorbidity: Prevalences and Associated Characteristics from Two French  
42 454 National Surveys. *J Nutr Health Aging*. 2016;20(8):860-9.  
43 455 2. Fried LP, Tangen CM, Walston J, Newman AB, Hirsch C, Gottdiener J, et al. Frailty in  
44 456 older adults: evidence for a phenotype. *J Gerontol A Biol Sci Med Sci*. 2001;56(3):M146-56.  
45 457 3. Considine J, Fox K, Plunkett D, Mecner M, M OR, Darzins P. Factors associated with  
46 458 unplanned readmissions in a major Australian health service. *Aust Health Rev*. 2019;43(1):1-  
47 459 9.  
48  
49 460 4. Sirven N, Rapp T. The cost of frailty in France. *Eur J Health Econ*. 2017;18(2):243-53.  
50 461 5. Thompson MQ, Theou O, Karnon J, Adams RJ, Visvanathan R. Frailty prevalence in  
51 462 Australia: Findings from four pooled Australian cohort studies. *Australas J Ageing*.  
52 463 2018;37(2):155-8.  
53 464 6. Giné-Garriga M, Roqué-Fíguls M, Coll-Planas L, Sitja-Rabert M, Salvà A. Physical  
54 465 exercise interventions for improving performance-based measures of physical function in  
55 466 community-dwelling, frail older adults: a systematic review and meta-analysis. *Archives of*  
56 467 *physical medicine and rehabilitation*. 2014;95(4):753-69. e3.  
57  
58  
59  
60

- 1  
2  
3 468 7. Ng TP, Feng L, Nyunt MS, Feng L, Niti M, Tan BY, et al. Nutritional, Physical,  
4 469 Cognitive, and Combination Interventions and Frailty Reversal Among Older Adults: A  
5 470 Randomized Controlled Trial. *American Journal of Medicine*. 2015;128(11):1225-36.e1.
- 6 471 8. Hsieh TJ, Su SC, Chen CW, Kang YW, Hu MH, Hsu LL, et al. Individualized home-  
7 472 based exercise and nutrition interventions improve frailty in older adults: a randomized  
8 473 controlled trial. *Int J Behav Nutr Phys Act*. 2019;16(1):119.
- 9 474 9. Lozano-Montoya I, Correa-Perez A, Abraha I, Soiza RL, Cherubini A, O'Mahony D, et  
10 475 al. Nonpharmacological interventions to treat physical frailty and sarcopenia in older patients:  
11 476 a systematic overview - the SENATOR Project ONTOP Series. *Clinical Interventions In*  
12 477 *Aging*. 2017;12:721-40.
- 13 478 10. Abizanda P, López MD, García VP, Estrella JdD, da Silva González Á, Vilardell NB,  
14 479 et al. Effects of an Oral Nutritional Supplementation Plus Physical Exercise Intervention on  
15 480 the Physical Function, Nutritional Status, and Quality of Life in Frail Institutionalized Older  
16 481 Adults: The ACTIVNES Study. *Journal of the American Medical Directors Association*.  
17 482 2015;16(5):439.e9-.e16.
- 18 483 11. Negm AM, Kennedy CC, Thabane L, Veroniki AA, Adachi JD, Richardson J, et al.  
19 484 Management of Frailty: A Systematic Review and Network Meta-analysis of Randomized  
20 485 Controlled Trials. *J Am Med Dir Assoc*. 2019;20(10):1190-8.
- 21 486 12. Rozzini R, Sabatini T, Cassinadri A, Boffelli S, Ferri M, Barbisoni P, et al. Relationship  
22 487 between functional loss before hospital admission and mortality in elderly persons with  
23 488 medical illness. *J Gerontol A Biol Sci Med Sci*. 2005;60(9):1180-3.
- 24 489 13. Covinsky KE, Martin GE, Beyth RJ, Justice AC, Sehgal AR, Landefeld CS. The  
25 490 relationship between clinical assessments of nutritional status and adverse outcomes in older  
26 491 hospitalized medical patients. *J Am Geriatr Soc*. 1999;47(5):532-8.
- 27 492 14. Sharma Y, Thompson C, Shari R, Hakendorf P, Miller M. Malnutrition in Acutely  
28 493 Unwell Hospitalized Elderly - "The Skeletons Are Still Rattling in the Hospital Closet". *J Nutr*  
29 494 *Health Aging*. 2017;21(10):1210-5.
- 30 495 15. Sharma Y, Miller M, Shahi R, Hakendorf P, Horwood C, Thompson C. Malnutrition  
31 496 screening in acutely unwell elderly inpatients. *Br J Nurs*. 2016;25(18):1006-14.
- 32 497 16. Laur CV, McNicholl T, Valaitis R, Keller HH. Malnutrition or frailty? Overlap and  
33 498 evidence gaps in the diagnosis and treatment of frailty and malnutrition. *Applied Physiology,*  
34 499 *Nutrition & Metabolism*. 2017;42(5):449-58.
- 35 500 17. Wilkinson R, Arensberg ME, Hickson M, Dwyer JT. Frailty Prevention and Treatment:  
36 501 Why Registered Dietitian Nutritionists Need to Take Charge. *J Acad Nutr Diet*.  
37 502 2017;117(7):1001-9.
- 38 503 18. Higgins JP, Green S. *Cochrane handbook for systematic reviews of interventions:*  
39 504 *Cochrane book series*. 2008.
- 40 505 19. Moher D, Liberati A, Tetzlaff J, Altman DG. Preferred reporting items for systematic  
41 506 reviews and meta-analyses: the PRISMA statement. *J Clin Epidemiol*. 2009;62(10):1006-12.
- 42 507 20. Innovation VH. Covidence systematic review software. Veritas Health Innovation  
43 508 Melbourne, VIC; 2017.
- 44 509 21. Sterne JAC, Savovic J, Page MJ, Elbers RG, Blencowe NS, Boutron I, et al. RoB 2: a  
45 510 revised tool for assessing risk of bias in randomised trials. *Bmj*. 2019;366:l4898.
- 46 511 22. Farrah K, Young K, Tunis MC, Zhao L. Risk of bias tools in systematic reviews of  
47 512 health interventions: an analysis of PROSPERO-registered protocols. *Systematic reviews*.  
48 513 2019;8(1):280.
- 49 514 23. RevMan. Review manager (revman)[computer program]. version 5.3. The Nordic  
50 515 Cochrane Centre, The Cochrane Collaboration Copenhagen, Denmark; 2014.
- 51 516 24. Higgins JP, Thompson SG, Deeks JJ, Altman DG. Measuring inconsistency in meta-  
52 517 analyses. *Bmj*. 2003;327(7414):557-60.

- 1  
2  
3 518 25. Villareal DT, Chode S, Parimi N, Sinacore DR, Hilton T, Armamento-Villareal R, et  
4 519 al. Weight loss, exercise, or both and physical function in obese older adults. *New England*  
5 520 *Journal of Medicine*. 2011;364(13):1218-29.
- 6 521 26. Armamento-Villareal R, Aguirre LE, Qualls C, Villareal DT. Effect of lifestyle  
7 522 intervention on the hormonal profile of frail, obese older men. *Journal of Nutrition, Health and*  
8 523 *Aging*. 2016;20(3):334-40.
- 9 524 27. Cameron ID, Fairhall N, Langron C, Lockwood K, Monaghan N, Aggar C, et al. A  
10 525 multifactorial interdisciplinary intervention reduces frailty in older people: randomized trial.  
11 526 *BMC Med*. 2013;11:65.
- 12 527 28. Fairhall N, Sherrington C, Kurrle SE, Lord SR, Lockwood K, Cameron ID. Effect of a  
13 528 multifactorial interdisciplinary intervention on mobility-related disability in frail older people:  
14 529 randomised controlled trial. *BMC Med*. 2012;10:120.
- 15 530 29. Fairhall N, Sherrington C, Lord SR, Kurrle SE, Langron C, Lockwood K, et al. Effect  
16 531 of a multifactorial, interdisciplinary intervention on risk factors for falls and fall rate in frail  
17 532 older people: a randomised controlled trial. *Age & Ageing*. 2014;43(5):616-22.
- 18 533 30. Fairhall N, Sherrington C, Kurrle SE, Lord SR, Lockwood K, Howard K, et al.  
19 534 Economic evaluation of a multifactorial, interdisciplinary intervention versus usual care to  
20 535 reduce frailty in frail older people. *Journal of the American Medical Directors Association*.  
21 536 2015;16(1):41-8.
- 22 537 31. Luger E, Dorner TE, Haider S, Kapan A, Lackinger C, Schindler K. Effects of a Home-  
23 538 Based and Volunteer-Administered Physical Training, Nutritional, and Social Support  
24 539 Program on Malnutrition and Frailty in Older Persons: A Randomized Controlled Trial. *Journal*  
25 540 *of the American Medical Directors Association*. 2016;17(7):671.e9-.e16.
- 26 541 32. Haider S, Dorner TE, Luger E, Kapan A, Titze S, Lackinger C, et al. Impact of a Home-  
27 542 Based Physical and Nutritional Intervention Program Conducted by Lay-Volunteers on  
28 543 Handgrip Strength in Prefrail and Frail Older Adults: A Randomized Control Trial. *PLoS ONE*  
29 544 [Electronic Resource]. 2017;12(1):e0169613.
- 30 545 33. Winzer E, Dorner TE, Grabovac I, Haider S, Kapan A, Lackinger C, et al. Behavior  
31 546 changes by a buddy-style intervention including physical training, and nutritional and social  
32 547 support. *Geriatrics & Gerontology International*. 2019;19(4):323-9.
- 33 548 34. Kapan A, Luger E, Haider S, Titze S, Schindler K, Lackinger C, et al. Fear of falling  
34 549 reduced by a lay led home-based program in frail community-dwelling older adults: A  
35 550 randomised controlled trial. *Archives of Gerontology & Geriatrics*. 2017;68:25-32.
- 36 551 35. Kapan A, Winzer E, Haider S, Titze S, Schindler K, Lackinger C, et al. Impact of a lay-  
37 552 led home-based intervention programme on quality of life in community-dwelling pre-frail and  
38 553 frail older adults: a randomized controlled trial. *BMC Geriatrics*. 2017;17:1-11.
- 39 554 36. Arrieta H, Astrugue C, Regueme S, Durrieu J, Maillard A, Rieger A, et al. Effects of a  
40 555 physical activity programme to prevent physical performance decline in onco-geriatric  
41 556 patients: a randomized multicentre trial. *Journal of Cachexia, Sarcopenia and Muscle*.  
42 557 2019;10(2):287-97.
- 43 558 37. Niccoli S, Kolobov A, Bon T, Rafilovich S, Munro H, Tanner K, et al. Whey Protein  
44 559 Supplementation Improves Rehabilitation Outcomes in Hospitalized Geriatric Patients: A  
45 560 Double Blinded, Randomized Controlled Trial. *Journal of Nutrition in Gerontology and*  
46 561 *Geriatrics*. 2017;36(4):149-65.
- 47 562 38. Milte R, Miller MD, Crotty M, Mackintosh S, Thomas S, Cameron ID, et al. Cost-  
48 563 effectiveness of individualized nutrition and exercise therapy for rehabilitation following hip  
49 564 fracture. *Journal of Rehabilitation Medicine (Stiftelsen Rehabiliteringsinformation)*.  
50 565 2016;48(4):378-85.
- 51 566 39. Singh NA, Quine S, Clemson LM, Williams EJ, Williamson DA, Stavrinou TM, et al.  
52 567 Effects of high-intensity progressive resistance training and targeted multidisciplinary



- 1  
2  
3 568 treatment of frailty on mortality and nursing home admissions after hip fracture: a randomized  
4 569 controlled trial. *Journal of the American Medical Directors Association*. 2012;13(1):24-30.
- 5 570 40. Blanc-Bisson C, Dechamps A, Gouspillou G, Dehail P, Bourdel-Marchasson I. A  
6 571 randomized controlled trial on early physiotherapy intervention versus usual care in acute car  
7 572 unit for elderly: Potential benefits in light of dietary intakes. *Journal of Nutrition, Health and*  
8 573 *Aging*. 2008;12(6):395-9.
- 9 574 41. Miller MD, Crotty M, Whitehead C, Bannerman E, Daniels LA. Nutritional  
10 575 supplementation and resistance training in nutritionally at risk older adults following lower  
11 576 limb fracture: a randomized controlled trial. *Clinical Rehabilitation*. 2006;20(4):311-23.
- 12 577 42. Rodriguez-Manas L, Laosa O, Vellas B, Paolisso G, Topinkova E, Oliva-Moreno J, et  
13 578 al. Effectiveness of a multimodal intervention in functionally impaired older people with type  
14 579 2 diabetes mellitus. *J Cachexia Sarcopenia Muscle*. 2019;10(4):721-33.
- 15 580 43. Azad N, Molnar F, Byszewski A. Lessons learned from a multidisciplinary heart failure  
16 581 clinic for older women: a randomised controlled trial. *Age Ageing*. 2008;37(3):282-7.
- 17 582 44. Romero-Ortuno R, Walsh CD, Lawlor BA, Kenny RA. A frailty instrument for primary  
18 583 care: findings from the Survey of Health, Ageing and Retirement in Europe (SHARE). *BMC*  
19 584 *geriatrics*. 2010;10(1):57.
- 20 585 45. Haider S, Dorner TE, Luger E, Kapan A, Titze S, Lackinger C, et al. Impact of a home-  
21 586 based physical and nutritional intervention program conducted by lay-volunteers on handgrip  
22 587 strength in prefrail and frail older adults: A randomized control trial. *PLoS ONE*. 2017;12(1).  
23 588 46. Wright J, Baldwin C. Oral nutritional support with or without exercise in the  
24 589 management of malnutrition in nutritionally vulnerable older people: A systematic review and  
25 590 meta-analysis. *Clin Nutr*. 2018;37(6 Pt A):1879-91.
- 26 591 47. Haider S, Grabovac I, Winzer E, Kapan A, Schindler KE, Lackinger C, et al. Change  
27 592 in inflammatory parameters in prefrail and frail persons obtaining physical training and  
28 593 nutritional support provided by lay volunteers: A randomized controlled trial. *PLoS ONE*.  
29 594 2017;12(10).
- 30 595 48. Apóstolo J, Cooke R, Bobrowicz-Campos E, Santana S, Marcucci M, Cano A, et al.  
31 596 Effectiveness of interventions to prevent pre-frailty and frailty progression in older adults: a  
32 597 systematic review. *JBIC database of systematic reviews and implementation reports*.  
33 598 2018;16(1):140.
- 34 599 49. De Vries N, Staal J, Van Ravensberg C, Hobbelen J, Rikkert MO, Nijhuis-Van der  
35 600 Sanden M. Outcome instruments to measure frailty: a systematic review. *Ageing research*  
36 601 *reviews*. 2011;10(1):104-14.
- 37 602 50. Dedebye L, Deschodt M, Verschueren S, Tournoy J, Gielen E. Effects of multi-domain  
38 603 interventions in (pre)frail elderly on frailty, functional, and cognitive status: a systematic  
39 604 review. *Clin Interv Aging*. 2017;12:873-96.
- 40 605 51. Tarazona-Santabalbina FJ, Gomez-Cabrera MC, Perez-Ros P, Martinez-Arnau FM,  
41 606 Cabo H, Tsaparas K, et al. A Multicomponent Exercise Intervention that Reverses Frailty and  
42 607 Improves Cognition, Emotion, and Social Networking in the Community-Dwelling Frail  
43 608 Elderly: A Randomized Clinical Trial. *J Am Med Dir Assoc*. 2016;17(5):426-33.
- 44 609 52. Kim CO, Lee KR. Preventive effect of protein-energy supplementation on the  
45 610 functional decline of frail older adults with low socioeconomic status: a community-based  
46 611 randomized controlled study. *Journals of Gerontology Series A: Biological Sciences &*  
47 612 *Medical Sciences*. 2013;68(3):309-16.
- 48 613 53. Denison HJ, Cooper C, Sayer AA, Robinson SM. Prevention and optimal management  
49 614 of sarcopenia: a review of combined exercise and nutrition interventions to improve muscle  
50 615 outcomes in older people. *Clinical interventions in aging*. 2015;10:859.
- 51 616 54. Munk T, Tolstrup U, Beck AM, Holst M, Rasmussen HH, Hovhannisyanyan K, et al.  
52 617 Individualised dietary counselling for nutritionally at-risk older patients following discharge

- 1  
2  
3 618 from acute hospital to home: a systematic review and meta-analysis. *Journal of Human*  
4 619 *Nutrition & Dietetics*. 2016;29(2):196-208.
- 5 620 55. Beck AM, Kjær S, Hansen BS, Storm RL, Thal-Jantzen K, Bitz C. Follow-up home  
6 621 visits with registered dietitians have a positive effect on the functional and nutritional status of  
7 622 geriatric medical patients after discharge: a randomized controlled trial. *Clinical Rehabilitation*.  
8 623 2013;27(6):483-93.
- 9 624 56. Fairhall N, Sherrington C, Cameron ID, Kurrle SE, Lord SR, Lockwood K, et al. A  
10 625 multifactorial intervention for frail older people is more than twice as effective among those  
11 626 who are compliant: complier average causal effect analysis of a randomised trial. *Journal of*  
12 627 *physiotherapy*. 2017;63(1):40-4.
- 13 628 57. Brisswalter J, Collardeau M, René A. Effects of acute physical exercise characteristics  
14 629 on cognitive performance. *Sports medicine*. 2002;32(9):555-66.
- 15 630 58. Klímová B, Vališ M. Nutritional interventions as beneficial strategies to delay cognitive  
16 631 decline in healthy older individuals. *nutrients*. 2018;10(7):905.
- 17 632 59. Schättin A, Baur K, Stutz J, Wolf P, de Bruin ED. Effects of physical exercise combined  
18 633 with nutritional supplements on aging brain related structures and functions: a systematic  
19 634 review. *Frontiers in aging neuroscience*. 2016;8:161.
- 20 635 60. Hardman RJ, Kennedy G, Macpherson H, Scholey AB, Pipingas A. A randomised  
21 636 controlled trial investigating the effects of Mediterranean diet and aerobic exercise on cognition  
22 637 in cognitively healthy older people living independently within aged care facilities: the  
23 638 *Lifestyle Intervention in Independent Living Aged Care (LILAC)* study protocol  
24 639 [ACTRN12614001133628]. *Nutrition journal*. 2015;14(1):53.
- 25 640 61. Drummond MF, Stoddart GL. Economic analysis and clinical trials. *Controlled clinical*  
26 641 *trials*. 1984;5(2):115-28.
- 27 642 62. Ruikes FG, Adang EM, Assendelft WJ, Schers HJ, Koopmans RT, Zuidema SU. Cost-  
28 643 effectiveness of a multicomponent primary care program targeting frail elderly people. *BMC*  
29 644 *family practice*. 2018;19(1):62.
- 30 645 63. Umberson D, Karas Montez J. Social relationships and health: A flashpoint for health  
31 646 policy. *Journal of health and social behavior*. 2010;51(1\_suppl):S54-S66.
- 32 647 64. Hoffmann TC, Glasziou PP, Boutron I, Milne R, Perera R, Moher D, et al. Better  
33 648 reporting of interventions: template for intervention description and replication (TIDieR)  
34 649 checklist and guide. *Bmj*. 2014;348:g1687.
- 35 650 65. Battersby M, Harris M, Smith D, Reed R, Woodman R. A pragmatic randomized  
36 651 controlled trial of the Flinders Program of chronic condition management in community health  
37 652 care services. *Patient Education and Counseling*. 2015;98(11):1367-75.
- 38 653 66. Fairhall N, Kurrle SE, Sherrington C, Lord SR, Lockwood K, John B, et al.  
39 654 Effectiveness of a multifactorial intervention on preventing development of frailty in pre-frail  
40 655 older people: Study protocol for a randomised controlled trial. *BMJ Open*. 2015;5(2).
- 41 656 67. Gonzalez-Sanchez M, Cuesta-Vargas AI, Del Mar Rodriguez Gonzalez M, Caro ED,  
42 657 Nunez GO, Galan-Mercant A, et al. Effectiveness of a muticomponent workout program  
43 658 integrated in an evidence based multimodal program in hyperfrail elderly patients:  
44 659 POWERAGING randomized clinical trial protocol. *BMC Geriatrics*. 2019;19(1).
- 45 660 68. Jadcak AD, Luscombe-Marsh N, Taylor P, Barnard R, Makwana N, Visvanathan R.  
46 661 The EXPRESS Study: Exercise and Protein Effectiveness Supplementation Study supporting  
47 662 autonomy in community dwelling frail older people-study protocol for a randomized controlled  
48 663 pilot and feasibility study. *Pilot & Feasibility Studies*. 2018;4:8.
- 49 664 69. Landi F, Cesari M, Calvani R, Cherubini A, Di Bari M, Bejuit R, et al. The 'Sarcopenia  
50 665 and Physical fRailty IN older people: multi-componenT Treatment strategies' (SPRINTT)  
51 666 randomized controlled trial: design and methods. *Aging Clinical & Experimental Research*.  
52 667 2017;29(1):89-100.

1  
2  
3 668  
4  
5

6 669 **Figure captions**  
7

8  
9 670 Fig.1 Flow diagram illustrating results of the search and study selection process as described  
10  
11 671 in the PRISMA statement  
12

13  
14 672 Fig 2. Meta-analysis of reduction in frailty score for exercise and nutrition intervention vs  
15  
16 673 standard care  
17

18  
19 674 Fig.3 Meta-analyses of Short physical performance battery, Gait speed, Balance test, Chair  
20  
21  
22 675 stand test, Activities of daily living, handgrip and muscle strength  
23  
24  
25  
26  
27  
28  
29  
30  
31  
32  
33  
34  
35  
36  
37  
38  
39  
40  
41  
42  
43  
44  
45  
46  
47  
48  
49  
50  
51  
52  
53  
54  
55  
56  
57  
58  
59  
60



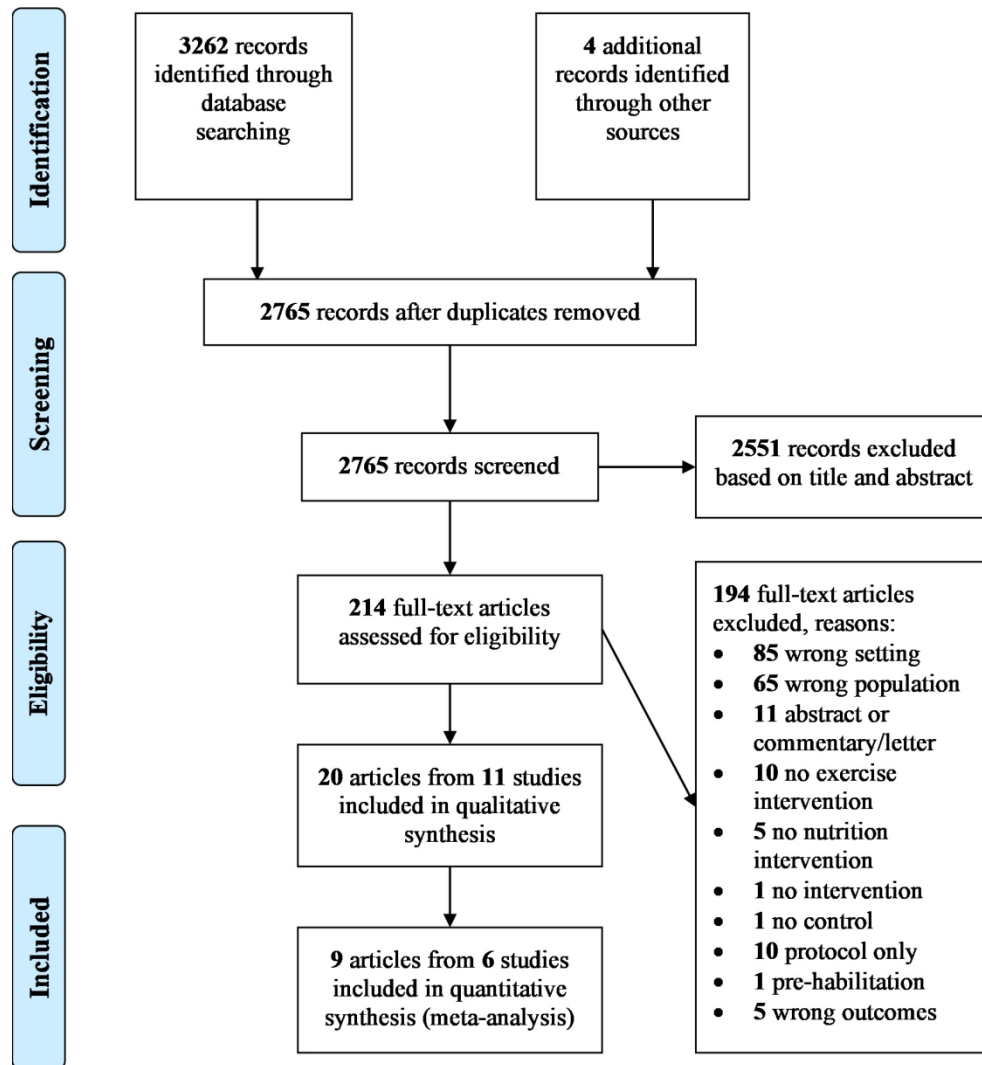

45 Fig.1 Flow diagram illustrating results of the search and study selection process as described in the PRISMA  
46 statement

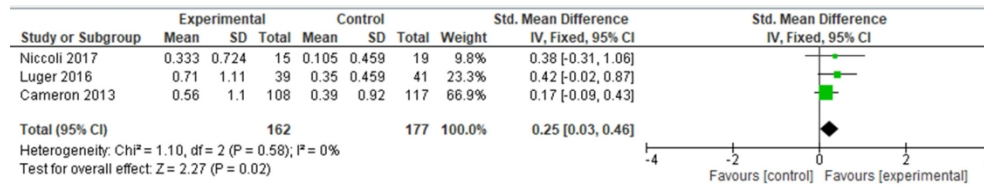

Abbreviations: CI confidence interval; IV inverse variance; SD standard deviation

Fig.2 Meta-analysis of reduction in frailty score for exercise and nutrition intervention vs standard care

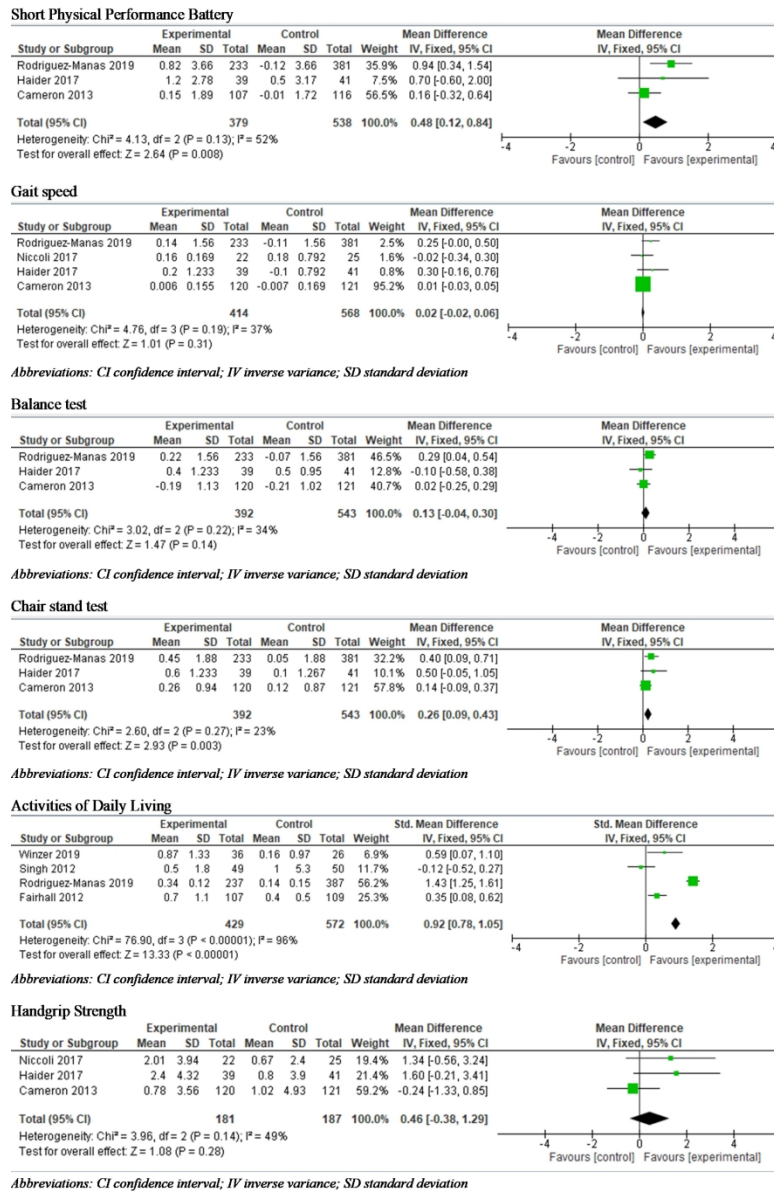

Fig.3 Meta-analyses of Short physical performance battery, Gait speed, Balance test, Chair stand test, Activities of daily living, handgrip and muscle strength

## Search Strategy – Medline

| #  | Searches                                                                                                                                                                                                                                                     |
|----|--------------------------------------------------------------------------------------------------------------------------------------------------------------------------------------------------------------------------------------------------------------|
| 1  | "diet, food, AND nutrition"/ or food/ or diet/                                                                                                                                                                                                               |
| 2  | dietary proteins/ or dietary supplements/                                                                                                                                                                                                                    |
| 3  | Nutritional Status/ or Feeding Behavior/                                                                                                                                                                                                                     |
| 4  | Dietitian/                                                                                                                                                                                                                                                   |
| 5  | Nutrition Assessment/ or Nutrition Therapy/                                                                                                                                                                                                                  |
| 6  | ((diet* or nutrition* or food*) adj5 (intervention or program or supplement or educat* or assess* or advic* or counsel* or treat*)).tw,kf.                                                                                                                   |
| 7  | or/1-6                                                                                                                                                                                                                                                       |
| 8  | motor activity/ or exercise/ or muscle strength/ or physical endurance/ or physical fitness.mp.                                                                                                                                                              |
| 9  | Exercise/ or resistance training/                                                                                                                                                                                                                            |
| 10 | (exercis* or "resistance training" or "exercis* therapy" or "muscle stretching exercis*" or "physical exercis*" or "strength train*" or "aerobic exercis*" or hydrotherapy or rehabilitat* or walk* or cycl* or conditioning* or "leg press" or flexib*).mp. |
| 11 | Physiotherapy/                                                                                                                                                                                                                                               |
| 12 | ((exercise* or resistan* or strength) adj5 (intervention or program or educat* or advice* or treat* or train* or rehabilitat*)).tw,kf.                                                                                                                       |
| 13 | or/8-12                                                                                                                                                                                                                                                      |
| 14 | frail elderly/ or pre-frail elderly/                                                                                                                                                                                                                         |
| 15 | frail*.mp.                                                                                                                                                                                                                                                   |
| 16 | (functional* adj2 (declin* or impair*) adj3 (aged or aging or elderly or elder* or old* or senior*)).mp.                                                                                                                                                     |
| 17 | (frail* and (geriatric* or gerontolog* or (vulnerable and older))).mp.                                                                                                                                                                                       |
| 18 | (frail* and (aged or aging or elderly or elder* or older or senior*)).mp.                                                                                                                                                                                    |
| 19 | (frail* and (geriatric* or gerontolog* or aging)).mp.                                                                                                                                                                                                        |
| 20 | ("geriatric assess*" or "functionally-impaired elder*").mp.                                                                                                                                                                                                  |
| 21 | 14 or 15 or 16 or 17 or 18 or 19 or 20                                                                                                                                                                                                                       |
| 22 | 7 and 13 and 21                                                                                                                                                                                                                                              |

1  
2  
3  
4  
5  
6  
7  
8  
9  
10  
11  
12  
13  
14  
15  
16  
17  
18  
19  
20  
21  
22  
23  
24  
25  
26  
27  
28  
29  
30  
31  
32  
33  
34  
35  
36  
37  
38  
39  
40  
41  
42  
43  
44  
45  
46  
47  
48  
49  
50  
51  
52  
53  
54  
55  
56  
57  
58  
59  
60

Translated above strategy for other databases: **CINAHL, Emcare, Scopus, Cochrane, Ageline and PEDro**

For peer review only

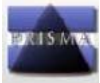

# PRISMA 2009 Checklist

1  
2  
3  
4  
5  
6  
7  
8  
9  
10  
11  
12  
13  
14  
15  
16  
17  
18  
19  
20  
21  
22  
23  
24  
25  
26  
27  
28  
29  
30  
31  
32  
33  
34  
35  
36  
37  
38  
39  
40  
41  
42  
43  
44  
45  
46  
47

| Section/topic                      | #  | Checklist item                                                                                                                                                                                                                                                                                              | Reported on page # |
|------------------------------------|----|-------------------------------------------------------------------------------------------------------------------------------------------------------------------------------------------------------------------------------------------------------------------------------------------------------------|--------------------|
| <b>TITLE</b>                       |    |                                                                                                                                                                                                                                                                                                             |                    |
| Title                              | 1  | Identify the report as a systematic review, meta-analysis, or both.                                                                                                                                                                                                                                         | 1                  |
| <b>ABSTRACT</b>                    |    |                                                                                                                                                                                                                                                                                                             |                    |
| Structured summary                 | 2  | Provide a structured summary including, as applicable: background; objectives; data sources; study eligibility criteria, participants, and interventions; study appraisal and synthesis methods; results; limitations; conclusions and implications of key findings; systematic review registration number. | 2                  |
| <b>INTRODUCTION</b>                |    |                                                                                                                                                                                                                                                                                                             |                    |
| Rationale                          | 3  | Describe the rationale for the review in the context of what is already known.                                                                                                                                                                                                                              | 2-5                |
| Objectives                         | 4  | Provide an explicit statement of questions being addressed with reference to participants, interventions, comparisons, outcomes, and study design (PICOS).                                                                                                                                                  | 5                  |
| <b>METHODS</b>                     |    |                                                                                                                                                                                                                                                                                                             |                    |
| Protocol and registration          | 5  | Indicate if a review protocol exists, if and where it can be accessed (e.g., Web address), and, if available, provide registration information including registration number.                                                                                                                               | 5-6                |
| Eligibility criteria               | 6  | Specify study characteristics (e.g., PICOS, length of follow-up) and report characteristics (e.g., years considered, language, publication status) used as criteria for eligibility, giving rationale.                                                                                                      | 6                  |
| Information sources                | 7  | Describe all information sources (e.g., databases with dates of coverage, contact with study authors to identify additional studies) in the search and date last searched.                                                                                                                                  | 6                  |
| Search                             | 8  | Present full electronic search strategy for at least one database, including any limits used, such that it could be repeated.                                                                                                                                                                               | 6                  |
| Study selection                    | 9  | State the process for selecting studies (i.e., screening, eligibility, included in systematic review, and, if applicable, included in the meta-analysis).                                                                                                                                                   | 6                  |
| Data collection process            | 10 | Describe method of data extraction from reports (e.g., piloted forms, independently, in duplicate) and any processes for obtaining and confirming data from investigators.                                                                                                                                  | 6                  |
| Data items                         | 11 | List and define all variables for which data were sought (e.g., PICOS, funding sources) and any assumptions and simplifications made.                                                                                                                                                                       | 6                  |
| Risk of bias in individual studies | 12 | Describe methods used for assessing risk of bias of individual studies (including specification of whether this was done at the study or outcome level), and how this information is to be used in any data synthesis.                                                                                      | 7                  |
| Summary measures                   | 13 | State the principal summary measures (e.g., risk ratio, difference in means).                                                                                                                                                                                                                               | 7                  |
| Synthesis of results               | 14 | Describe the methods of handling data and combining results of studies, if done, including measures of consistency (e.g., $I^2$ ) for each meta-analysis.                                                                                                                                                   | 6-7                |

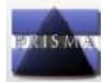

# PRISMA 2009 Checklist

Page 1 of 2

| Section/topic                 | #  | Checklist item                                                                                                                                                                                           | Reported on page # |
|-------------------------------|----|----------------------------------------------------------------------------------------------------------------------------------------------------------------------------------------------------------|--------------------|
| Risk of bias across studies   | 15 | Specify any assessment of risk of bias that may affect the cumulative evidence (e.g., publication bias, selective reporting within studies).                                                             | 7                  |
| Additional analyses           | 16 | Describe methods of additional analyses (e.g., sensitivity or subgroup analyses, meta-regression), if done, indicating which were pre-specified.                                                         | nil                |
| <b>RESULTS</b>                |    |                                                                                                                                                                                                          |                    |
| Study selection               | 17 | Give numbers of studies screened, assessed for eligibility, and included in the review, with reasons for exclusions at each stage, ideally with a flow diagram.                                          | 7-8, fig 1         |
| Study characteristics         | 18 | For each study, present characteristics for which data were extracted (e.g., study size, PICOS, follow-up period) and provide the citations.                                                             | 7-10               |
| Risk of bias within studies   | 19 | Present data on risk of bias of each study and, if available, any outcome level assessment (see item 12).                                                                                                | 10-11              |
| Results of individual studies | 20 | For all outcomes considered (benefits or harms), present, for each study: (a) simple summary data for each intervention group (b) effect estimates and confidence intervals, ideally with a forest plot. | 12-18              |
| Synthesis of results          | 21 | Present results of each meta-analysis done, including confidence intervals and measures of consistency.                                                                                                  | 12-18, fig. 2 & 3  |
| Risk of bias across studies   | 22 | Present results of any assessment of risk of bias across studies (see Item 15).                                                                                                                          | 8, Fig 2           |
| Additional analysis           | 23 | Give results of additional analyses, if done (e.g., sensitivity or subgroup analyses, meta-regression [see Item 16]).                                                                                    | nil                |
| <b>DISCUSSION</b>             |    |                                                                                                                                                                                                          |                    |
| Summary of evidence           | 24 | Summarize the main findings including the strength of evidence for each main outcome; consider their relevance to key groups (e.g., healthcare providers, users, and policy makers).                     | 18-21              |
| Limitations                   | 25 | Discuss limitations at study and outcome level (e.g., risk of bias), and at review-level (e.g., incomplete retrieval of identified research, reporting bias).                                            | 21-22              |
| Conclusions                   | 26 | Provide a general interpretation of the results in the context of other evidence, and implications for future research.                                                                                  | 22-23              |
| <b>FUNDING</b>                |    |                                                                                                                                                                                                          |                    |
| Funding                       | 27 | Describe sources of funding for the systematic review and other support (e.g., supply of data); role of funders for the systematic review.                                                               | 24                 |

From: Moher D, Liberati A, Tetzlaff J, Altman DG, The PRISMA Group (2009). Preferred Reporting Items for Systematic Reviews and Meta-Analyses: The PRISMA Statement. PLoS Med 6(7): e1000097. doi:10.1371/journal.pmed1000097

For more information, visit: [www.prisma-statement.org](http://www.prisma-statement.org).

For peer review only - <http://bmjopen.bmj.com/site/about/guidelines.xhtml>

# BMJ Open

## Effectiveness of combined exercise and nutrition interventions in pre-frail or frail older hospitalised patients: a systematic review and meta-analysis

|                                 |                                                                                                                                                                                                                                                                                                                                                                                                                                                                                    |
|---------------------------------|------------------------------------------------------------------------------------------------------------------------------------------------------------------------------------------------------------------------------------------------------------------------------------------------------------------------------------------------------------------------------------------------------------------------------------------------------------------------------------|
| Journal:                        | <i>BMJ Open</i>                                                                                                                                                                                                                                                                                                                                                                                                                                                                    |
| Manuscript ID                   | bmjopen-2020-040146.R1                                                                                                                                                                                                                                                                                                                                                                                                                                                             |
| Article Type:                   | Original research                                                                                                                                                                                                                                                                                                                                                                                                                                                                  |
| Date Submitted by the Author:   | 12-Sep-2020                                                                                                                                                                                                                                                                                                                                                                                                                                                                        |
| Complete List of Authors:       | Han, chad Yixian; Flinders University College of Nursing and Health Sciences,<br>Miller, Michelle; Flinders University Faculty of Medicine Nursing and Health Sciences, Nutrition & Dietetics<br>Yaxley, Alison; Flinders University College of Nursing and Health Sciences<br>Baldwin, Claire; Flinders University College of Nursing and Health Sciences<br>Woodman, Richard; Flinders University, General Practice<br>Sharma, Yogesh; Flinders Medical Centre, General Medicine |
| <b>Primary Subject Heading</b>: | Geriatric medicine                                                                                                                                                                                                                                                                                                                                                                                                                                                                 |
| Secondary Subject Heading:      | Rehabilitation medicine                                                                                                                                                                                                                                                                                                                                                                                                                                                            |
| Keywords:                       | GERIATRIC MEDICINE, REHABILITATION MEDICINE, NUTRITION & DIETETICS, GENERAL MEDICINE (see Internal Medicine)                                                                                                                                                                                                                                                                                                                                                                       |
|                                 |                                                                                                                                                                                                                                                                                                                                                                                                                                                                                    |

SCHOLARONE™  
Manuscripts



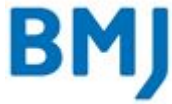

I, the Submitting Author has the right to grant and does grant on behalf of all authors of the Work (as defined in the below author licence), an exclusive licence and/or a non-exclusive licence for contributions from authors who are: i) UK Crown employees; ii) where BMJ has agreed a CC-BY licence shall apply, and/or iii) in accordance with the terms applicable for US Federal Government officers or employees acting as part of their official duties; on a worldwide, perpetual, irrevocable, royalty-free basis to BMJ Publishing Group Ltd ("BMJ") its licensees and where the relevant Journal is co-owned by BMJ to the co-owners of the Journal, to publish the Work in this journal and any other BMJ products and to exploit all rights, as set out in our [licence](#).

The Submitting Author accepts and understands that any supply made under these terms is made by BMJ to the Submitting Author unless you are acting as an employee on behalf of your employer or a postgraduate student of an affiliated institution which is paying any applicable article publishing charge ("APC") for Open Access articles. Where the Submitting Author wishes to make the Work available on an Open Access basis (and intends to pay the relevant APC), the terms of reuse of such Open Access shall be governed by a Creative Commons licence – details of these licences and which [Creative Commons](#) licence will apply to this Work are set out in our licence referred to above.

Other than as permitted in any relevant BMJ Author's Self Archiving Policies, I confirm this Work has not been accepted for publication elsewhere, is not being considered for publication elsewhere and does not duplicate material already published. I confirm all authors consent to publication of this Work and authorise the granting of this licence.

1  
2  
3 **Title Page**  
4

5  
6 2 Effectiveness of combined exercise and nutrition interventions in pre-frail or frail older  
7  
8 3 hospitalised patients: a systematic review and meta-analysis  
9

10  
11 **Authors:**  
12

13  
14 5 Chad Yixian Han<sup>1,2</sup> [chad.han@flinders.edu.au](mailto:chad.han@flinders.edu.au)  
15

16  
17 6 Michelle Miller<sup>1</sup>, [michelle.miller@flinders.edu.au](mailto:michelle.miller@flinders.edu.au)  
18

19  
20 7 Alison Yaxley<sup>1</sup>, [alison.yaxley@flinders.edu.au](mailto:alison.yaxley@flinders.edu.au)  
21

22  
23 8 Claire Baldwin<sup>1</sup>, [claire.baldwin@flinders.edu.au](mailto:claire.baldwin@flinders.edu.au)  
24

25  
26 9 Richard Woodman<sup>2</sup>, [richard.woodman@flinders.edu.au](mailto:richard.woodman@flinders.edu.au)  
27

28  
29 10 Yogesh Sharma<sup>3,4</sup> [yogesh.sharma@sa.gov.au](mailto:yogesh.sharma@sa.gov.au)  
30

31  
32 <sup>1</sup>Caring Futures Institute, College of Nursing and Health Sciences, Flinders University,  
33  
34 Australia; <sup>2</sup>Flinders Centre for Epidemiology and Biostatistics, Flinders University, Australia;  
35  
36 <sup>3</sup>College of Medicine and Public Health, Flinders University, Australia; <sup>4</sup>Department of  
37  
38 General Medicine, Flinders Medical Centre, Australia  
39  
40

41  
42 **Corresponding Author:** Chad Yixian Han, Caring Futures Institute, College of Nursing and  
43  
44 Health Sciences, Flinders University, Sturt Road, Bedford Park, SA5042, E-mail address:  
45  
46 [chad.han@flinders.edu.au](mailto:chad.han@flinders.edu.au), Tel.: +61 452091109  
47  
48

49  
50 **Keywords:** frail; pre-frail; older people; exercise; nutrition  
51

52  
53 **Word count:** 4631 (excluding abstract, references, tables, figures)  
54

55  
56 **PROSPERO registration:** CRD42020153934  
57

58  
59 21  
60

1  
2  
3 22 **Abstract**  
4  
5

6 23 Objectives: To determine the effectiveness of combined exercise-nutrition interventions in pre-  
7  
8 24 frail/frail hospitalised older adults on frailty, frailty-related indicators, quality of life (QoL),  
9  
10 25 falls and its cost-effectiveness.  
11  
12

13  
14 26 Design: Randomised controlled trials (RCTs) of combined exercise-nutrition interventions on  
15  
16 27 hospitalised pre-frail/frail older adults  $\geq 65$  years were collated from MEDLINE, Emtree,  
17  
18 28 CINAHL, Ageline, Scopus, Cochrane and PEDro on 10<sup>th</sup> October 2019. The methodological  
19  
20 29 quality was appraised, and data were summarised descriptively or by the meta-analyses using  
21  
22 30 a fixed effects model. The standardised mean difference (SMD) or difference of means (MD)  
23  
24 31 with 95% confidence intervals (CIs) was calculated.  
25  
26  
27

28 32 Results: Twenty articles from 11 RCTs experimenting exercise-nutrition interventions on  
29  
30 33 hospitalised older adults were included. Eight articles were suitable for the meta-analyses. One  
31  
32 34 study had low risk of bias and found improvements in physical performance and frailty-related  
33  
34 35 biomarkers. Exercise interventions were mostly supervised by a physiotherapist, focusing on  
35  
36 36 strength, ranging 2-5 times/week, of 20-90 minutes duration. Most nutrition interventions  
37  
38 37 involved education and supplementation but had dietitian supervision in only three studies. The  
39  
40 38 meta-analyses suggest that participants who received exercise-nutrition intervention had  
41  
42 39 greater reduction in frailty scores (n=3, SMD 0.25; 95% CI 0.03-0.46; P=0.02) and  
43  
44 40 improvement in short physical performance battery (SPPB) scores (n=3, MD 0.48; 95% CI  
45  
46 41 0.12-0.84; P=0.008) compared to standard care. Only the chair-stand test (n=3) out of the three  
47  
48 42 SPPB components was significantly improved (MD 0.26; 95% CI 0.09-0.43; P=0.003).  
49  
50 43 Patients were more independent in activities of daily living in intervention groups, but high  
51  
52 44 heterogeneity was observed ( $I^2=96\%$ ,  $P<0.001$ ). The pooled effect for handgrip (n=3) +/- knee  
53  
54 45 extension muscle strength (n=4) was not statistically significant. Nutritional status, cognition,  
55  
56  
57  
58  
59  
60

1  
2  
3 46 biomarkers, QoL, falls and cost-effectiveness were summarised descriptively due to  
4  
5 47 insufficient data.  
6  
7

8 48 Conclusions: There is evidence, albeit weak, showing that exercise-nutrition interventions are  
9  
10 49 effective to improve frailty and frailty-related indicators in hospitalised older adults.  
11  
12

13  
14 50 **PROSPERO registration number: CRD42020153934**  
15

### 16 17 51 **Strengths and limitations of study** 18

- 19  
20 52 • This is the first comprehensive systematic review with meta-analysis on the  
21  
22 53 effectiveness of exercise-nutrition interventions on frailty and outcomes related to  
23  
24 54 frailty in hospitalised and pre-frail/frail older adults.  
25  
26 55 • Only randomised controlled trials describing existing exercise-nutrition interventions  
27  
28 56 in frail older hospitalised patients were included.  
29  
30 57 • There was a moderate risk of bias for most included studies such that the findings of  
31  
32 58 this review are inconclusive, making it difficult to draw firm conclusions.  
33  
34  
35

### 36 37 59 **Introduction** 38

39  
40 60 Frailty is a major contributor to late-life disability as it leads to loss of independence.<sup>1</sup> It is also  
41  
42 61 associated with poor health outcomes, and, increased health-care costs and service use.<sup>1</sup> Frailty  
43  
44 62 has been defined for clinical research by Fried et al<sup>2</sup> as a combination of unintentional weight  
45  
46 63 loss, weakness, exhaustion, slowness and reduced physical activity. Older adults (aged >65  
47  
48 64 years) that have been classified as frail and are hospitalised, have a three-fold higher risk of  
49  
50 65 readmission or death, as compared to the younger population.<sup>3</sup> The management of older adults  
51  
52 66 who are frail has an incremental effect on health expenditures with an additional equivalent of  
53  
54 67 AU\$2400 per frail patient per year.<sup>4</sup> With 21% of the population over 65 years estimated to be  
55  
56  
57  
58  
59  
60

1  
2  
3 68 frail and 48% estimated to be pre-frail, concerns of economic impact are compounded by an  
4  
5 69 ageing population.<sup>5</sup>  
6  
7

8 70 Exercise and nutrition are inextricably linked, in particular strength training can address  
9  
10 71 component issues of the frail phenotype.<sup>6</sup> Yet evidence supporting the effectiveness of  
11  
12 72 exercise-nutrition interventions for reversal of frailty is limited to community-dwelling older  
13  
14 73 adults.<sup>7</sup> In a study of community participants, a 3-month combined exercise-nutrition  
15  
16 74 intervention resulted in a significant reversal of frailty (reduction in Fried frailty score) at 6-  
17  
18 75 months, compared to the control group (between-group difference  $-0.34$ ; 95% confidence  
19  
20 76 interval [CI]  $-0.52$  to  $-0.16$ ;  $P < 0.001$ ).<sup>8</sup> The combination of exercise therapy and dietary  
21  
22 77 intervention in older adults who are frail, has also been reported to increase muscle strength  
23  
24 78 (knee extension between-group difference  $1.84$  kg, 95% CI  $0.17$ – $3.51$ ,  $P = 0.03$ )<sup>9</sup> and improve  
25  
26 79 nutritional status (Mini Nutritional Assessment (MNA) Short Form between group difference  
27  
28 80  $1.4$ , 95% CI  $0.9$ - $1.9$ ,  $P < 0.01$ ).<sup>10</sup>  
29  
30  
31  
32  
33

34 81 A recent meta-analysis suggested that although effective, exercise combined with nutrition was  
35  
36 82 not more effective in treating frailty than exercise alone.<sup>11</sup> However, the majority of included  
37  
38 83 studies were conducted in a community setting, with only 15% of older adults either  
39  
40 84 hospitalised or recruited from acute care settings. No study has systematically evaluated  
41  
42 85 evidence for interventions that commence during acute hospitalisation or early post discharge  
43  
44 86 (in the high-risk period for post-hospital syndrome).  
45  
46  
47  
48

49 87 Hospitalisation is a vulnerable period, especially for older adults who are frail and therefore at  
50  
51 88 higher risk of functional loss,<sup>12</sup> malnutrition<sup>13, 14</sup> and further decline in frailty status.  
52  
53 89 Malnutrition is ubiquitous in older hospitalised patients with a prevalence as high as 50%.<sup>15</sup>  
54  
55 90 Since many domains of frailty are attributed to poor nutrition,<sup>16</sup> the effect of nutrition  
56  
57 91 intervention when combined with exercise, may be more significant in the hospitalised  
58  
59  
60

1  
2  
3 92 population.<sup>16</sup> Also, recent review suggest that nutrition support, provided by a multidisciplinary  
4  
5 93 team, may have a positive impact on mortality and quality of life in hospitalised older adult  
6  
7 94 patients.<sup>17</sup> Nutritional therapy extends beyond protein or nutrition supplementation as reported  
8  
9 95 in previous studies and may be more effective as part of individualised medical nutrition  
10  
11 96 therapies involving dietitians to improve diet adequacy.<sup>18</sup>  
12  
13  
14

15 97 This study aims to determine the effectiveness of combined exercise-nutrition interventions on  
16  
17 98 (1) frailty, (2) frailty-related indicators, falls, quality of life (QoL) and (3) its cost effectiveness  
18  
19 99 on pre-frail or frail hospitalised older adults.  
20  
21  
22

23 100

## 26 101 **Materials and Methods**

### 29 102 *Protocol and registration*

31  
32 103 The protocol for this review was compliant with Cochrane systematic review guidelines,<sup>19</sup> and  
33  
34 104 registered with the International Prospective Register of Systematic Reviews (PROSPERO),  
35  
36 105 CRD42020153934. The study is reported according to Preferred Reporting Items for  
37  
38 106 Systematic Reviews and Meta-Analyses (PRISMA) guidelines.<sup>20</sup> Patients and/or members of  
39  
40 107 the public were not involved in this study.  
41  
42  
43

### 44 108 *Search methods*

45  
46  
47 109 Systematic searches of electronic databases (MEDLINE, Emcare, CINAHL, Ageline, Scopus,  
48  
49 110 Cochrane and PEDro) were conducted by the lead author (CH) from inception until 10th  
50  
51 111 October 2019 using search strategies reviewed by an academic librarian (search queries  
52  
53 112 available in Supplementary file 1). Additionally, related citations to eligible items were  
54  
55 113 identified using the suggested related citation function in Pubmed. Reference lists of eligible  
56  
57 114 items were also screened.  
58  
59  
60

1  
2  
3 115 *Inclusion and exclusion criteria*  
4  
5

6 116 The inclusion criteria were: 1) randomised controlled trials; 2) inclusion of pre-frail or frail  
7  
8 117 participants (as defined by study authors); 3) recruitment of older adult inpatients and/or those  
9  
10 118 hospitalised within the past 30 days of recruitment; 4) interventions that started while patients  
11  
12 119 were admitted and continued in the community/post-hospitalisation, or, commenced within 30  
13  
14 120 days of hospital discharge; 5) interventions that involved both physical exercises and  
15  
16 121 nutritional interventions (dietary modifications/education/training alone or combined with oral  
17  
18 122 nutrition supplementation); 6) measured frailty with an assessment tool or at least one indicator  
19  
20 123 relevant to frailty (nutritional status, physical function, cognitive function and mood, physical  
21  
22 124 activity level or biomarkers, falls and QoL and/or economic analysis of interventions. Studies  
23  
24 125 were excluded if they described protocols with no pilot outcomes, interventions delivered as a  
25  
26 126 part of a palliative care program, or interventions solely designed to facilitate discharge  
27  
28 127 planning (e.g. telephone support services, providing no pre-frailty or frailty intervention  
29  
30 128 element), recruited participants admitted following a mental health episode.  
31  
32  
33  
34  
35

36 129 *Study selection and data extraction*  
37  
38

39 130 Covidence<sup>21</sup> was used to manage citations for title and abstract, and full-text screening, in  
40  
41 131 duplicate (CH and YS, supplement 1). The reviewers were unblinded to authors, journals and  
42  
43 132 countries of origin. Any disagreement was resolved through discussion or consensus opinion  
44  
45 133 with the other authors. A data extraction form was developed a priori by the research team,  
46  
47 134 such that two researchers (CH and YS) performed data extraction independently, on eligible  
48  
49 135 full-text articles. Where available, the continuous data were extracted as (i) mean change with  
50  
51 136 standard deviation (SD), standard error of mean (SE) or 95% confidence interval (CI), or (ii)  
52  
53  
54  
55 137 mean or median values with SD, SE or interquartile range post intervention. If the required  
56  
57  
58  
59  
60



1  
2  
3 138 data were not reported within a publication (including change in means for outcomes of  
4  
5 139 interest), the authors were emailed to request for it.  
6  
7

#### 8 140 *Quality of the studies* 9

10  
11 141 The risk of bias in the individual studies was assessed by the Revised Cochrane risk-of-bias  
12  
13 142 tool for randomised trials (RoB-2) by two researchers (CH and YS) independently.<sup>22</sup> Any  
14  
15 143 disagreements were resolved by discussion or if required with consensus of a third reviewer.  
16  
17 144 The Cochrane risk-of-bias tool is widely used to assess randomised controlled trials (RCT) for  
18  
19 145 best practice.<sup>23</sup> Studies were given an overall risk-of-bias judgement of low, some concerns or  
20  
21 146 high. Overall risk-of-bias was determined as having “some concerns” if any one of the risks of  
22  
23 147 bias domains was rated as having “some concerns”. Likewise, studies were deemed to have an  
24  
25 148 overall high risk of bias if any one domain had a high risk of bias.  
26  
27  
28

#### 29 149 *Data synthesis and statistical analyses* 30

31  
32  
33 150 Where possible, a meta-analysis was performed; continuous outcome data were pooled and  
34  
35 151 reported as either the difference of means (MD) if the same outcome assessment tools were  
36  
37 152 used or the standardised mean difference (SMD) if different outcome assessment tools were  
38  
39 153 used, and the 95% CI, if there were two or more studies. The SMD is the mean difference when  
40  
41 154 the outcome for each study is standardised to have mean zero and SD=1. Studies presenting  
42  
43 155 SE were converted to SD via the conversion formula.<sup>19</sup> The fixed-effect meta-analyses were  
44  
45 156 carried out with Cochrane Review Manager (RevMan) 5.3.<sup>24</sup> A P value of <0.05 was  
46  
47 157 considered statistically significant. The variability between studies (heterogeneity) was  
48  
49 158 assessed by I<sup>2</sup> and its 95% CI.<sup>25</sup> For studies with unobtainable missing, or incomparable data,  
50  
51 159 results were qualitatively synthesised.  
52  
53  
54

#### 55 160 *Patient and public involvement* 56

57  
58  
59 161 No patients were involved in this study  
60

## 162 **Results**

### 163 *Study selection*

164 The flow of studies through the review process is summarised in Figure 1. Twenty articles  
165 reporting on 11 studies were eligible for data synthesis and analysis. Three of 11 studies  
166 presented results from their cohort across separate publications. Firstly, Villareal et al<sup>26</sup>  
167 reported on physical functioning outcomes with biomarker results in the publication of  
168 Armamento-Villareal et al.<sup>27</sup> Secondly, Cameron et al<sup>28</sup> reported on frailty and some physical  
169 function outcomes, with other physical function outcomes in a secondary publication<sup>29</sup> fall  
170 rates<sup>30</sup> and cost-analysis in another.<sup>31</sup> Thirdly, Luger et al<sup>32</sup> reported on frailty and nutritional  
171 status, with physical functioning outcomes across two other publications,<sup>33, 34</sup> fall efficacy<sup>35</sup>  
172 and quality of life.<sup>36</sup> For clarity, the primary articles that report frailty or physical function  
173 outcomes are cited for descriptive data in Tables 1-3 while individual articles are cited for  
174 synthesis of outcome results.

### 175 *Study and sample characteristics*

176 Details of study characteristics are available in Table 1. Across all studies, a total of 2307  
177 participants were investigated. Most studies reported that patients were recruited from hospital  
178 wards (n=7)<sup>28, 37-42</sup> while the other four studies<sup>26, 32, 43, 44</sup> included patients that were recruited  
179 from hospital wards and community. Seven studies included only frail participants,<sup>26, 28, 39-42, 44</sup>  
180 and the remaining four studies<sup>32, 37, 38, 43</sup> included frail, pre-frail and non-frail participants. The  
181 Fried frailty phenotype criteria<sup>2</sup> were used most frequently to classify frailty (n=4).<sup>28, 37, 38, 43</sup>  
182 with participants considered non-frail, pre-frail or frail if 0, 1-2, 3-5 criteria were present,  
183 respectively. Luger et al used the Frailty Instrument for Primary Care of the Survey of Health,  
184 Ageing, and Retirement in Europe (SHARE-FI)<sup>32</sup> which integrates components of exhaustion,  
185 appetite, handgrip strength, walking difficulties and physical activity.<sup>45</sup> Five studies did not

1  
2  
3 186 report any assessment method to define frailty.<sup>39-42, 44</sup> One study used a combination of three  
4  
5 187 tools – modified Physical Performance Test, the measurement of VO<sub>2</sub> peak, and the Functional  
6  
7 188 Status Questionnaire.<sup>26</sup>  
8  
9

### 10 189 *Risk of bias within individual studies*

11  
12  
13  
14 190 Table 2 outlines the risk of bias in individual studies. One study<sup>26</sup> had a low risk of bias and  
15  
16 191 one study had a high risk of bias (including unblinded secondary outcome assessment and  
17  
18 192 insufficient detail on standard care in control groups across recruitment sites). The other nine  
19  
20 193 studies<sup>28, 32, 37-39, 41-44</sup> were rated as having some concerns overall, of which five could have  
21  
22  
23 194 been improved in  $\geq 1$  domain. The remaining four studies<sup>27, 31, 39, 41</sup> that were rated as having  
24  
25 195 “some concerns” overall, had risk in only one domain with the most common reason being  
26  
27 196 failure to blind intervention/allocated group to participants. Examples of other concerns about  
28  
29  
30 197 risk of bias included: assessors being aware of the group allocation<sup>32</sup> (measurement of  
31  
32 198 outcomes domain); or a lack of information about participants/researcher blinding to group  
33  
34 199 allocation.<sup>26, 28, 43</sup>  
35  
36

### 37 200 *Characteristics of exercise intervention component*

38  
39  
40 201 Characteristics of the exercise interventions used in studies are outlined in Table 3, and  
41  
42 202 included combinations of the following: supervised individual exercises (n=10),<sup>26, 28, 37-44</sup> group  
43  
44 203 exercises (n=3),<sup>26, 40, 44</sup> education including support with resources (digital versatile disc (DVD)  
45  
46 204 or visual aid instruction booklet, n=2),<sup>32, 37</sup> and motivational interviewing using a standardised  
47  
48 205 protocol (n=1).<sup>32</sup> Three studies<sup>38, 41, 43</sup> had inpatient only interventions, five<sup>37, 39, 40, 42, 44</sup> had  
49  
50 206 interventions that extended from inpatient to post-discharge, two<sup>28, 32</sup> studies offered the  
51  
52 207 intervention post-discharge only and one<sup>26</sup> did not report.  
53  
54  
55

56  
57 208 In the majority of studies (n=9), the exercise component was delivered by a physiotherapist.<sup>26,</sup>  
58  
59 209 <sup>37-44</sup> Two studies used trained fitness instructors,<sup>37, 40</sup> and another engaged lay volunteers who  
60

210 **Table 1.** Characteristics of included studies examining pre-frail or frail hospitalised older adults

| Study                                             | Country       | n   | Mean age                        | Study participants, characteristics                                                                                       | Recruitment site                      | Duration of intervention                  | Follow-up period | Frailty diagnostic tool/criteria used                                                                                      | Reported % of prefrail, frail                  |
|---------------------------------------------------|---------------|-----|---------------------------------|---------------------------------------------------------------------------------------------------------------------------|---------------------------------------|-------------------------------------------|------------------|----------------------------------------------------------------------------------------------------------------------------|------------------------------------------------|
| Arrieta <i>et al</i> , 2019 <sup>35</sup>         | France        | 302 | 76.7 ±5.0                       | Frail, onco-geriatric, older men & women; BMI: 26.1 ±4.6 kg/m <sup>2</sup> (UCG); 26.2 ±4.4 kg/m <sup>2</sup> (IG)        | Acute hospital                        | 1y                                        | 1y, 2y           | Fried frailty phenotype criteria                                                                                           | Non-frail: 73.6%<br>Frail: 26.4%               |
| Rodriguez-Manas <i>et al</i> , 2019 <sup>41</sup> | Spain         | 964 | 78.0 ±5.44                      | Frail older men and women with T2DM; BMI: 29.6 ±5.0 kg/m <sup>2</sup>                                                     | Acute hospitals or primary care sites | 4.5m (exercise), 3.5-4w (nutrition)       | 1y               | Fried frailty phenotype criteria                                                                                           | Pre-frail: 62.2%<br>Frail: 37.8%               |
| Niccoli <i>et al</i> , 2017 <sup>36</sup>         | Canada        | 47  | 81.3 ±1.0                       | Frail older men and women hospitalised patients; BMI: 26.4 ±6.6 kg/m <sup>2</sup> (UCG), 24.2 ±5.2 kg/m <sup>2</sup> (IG) | Acute hospital                        | Average LOS (days): 20.9 (UCG), 26.5 (IG) | Upon discharge   | Fried frailty phenotype criteria                                                                                           | Pre-frail: at least 87.8%<br>Frail: NR         |
| Luger <i>et al</i> , 2016 <sup>*30</sup>          | Austria       | 80  | 82.8 ±8.0                       | Frail older men and women; BMI: 27.2 ±4.3 kg/m <sup>2</sup>                                                               | Acute hospital and community          | 3m                                        | 3m               | SHARE-FI (female>0.315; male: >1.212 points)                                                                               | Non-frail: 1%<br>pre-frail: 35%,<br>frail: 64% |
| Milte <i>et al</i> , 2016 <sup>37</sup>           | Australia     | 175 | 83.0 ±6.2 (UCG), 82.4 ±5.7 (IG) | Frail older men and women post hip fracture, BMI: NR                                                                      | Acute hospital                        | 6m                                        | 6m               | NR                                                                                                                         | Frail: 100% as determined by study authors     |
| Cameron <i>et al</i> , 2013 <sup>†26</sup>        | Australia     | 241 | 83.3 ±5.9                       | Frail older men and women, BMI: 26.4 ±6.0 kg/m <sup>2</sup> (UCG) 26.1 ±5.9 kg/m <sup>2</sup> (IG)                        | Acute hospital                        | 1y                                        | 3m, 1y           | Fried frailty phenotype criteria                                                                                           | Frail: 100% as determined by study authors     |
| Singh <i>et al</i> , 2012 <sup>38</sup>           | Australia     | 124 | 79.3 ± 9.6                      | Frail older men and women; BMI: NR                                                                                        | Acute hospital                        | 1y                                        | 4m, 1y           | NR                                                                                                                         | Frail: 100% as determined by study authors     |
| Villareal <i>et al</i> , 2011 <sup>‡24</sup>      | United States | 107 | 69.3 ±4.1                       | Frail obese older men; BMI: 36.8 ±4.6 kg/m <sup>2</sup>                                                                   | Acute hospital and community          | 1y                                        | 6m, 1y           | ≥2 criteria: Modified PPT score 18–32; VO <sup>2</sup> peak of 11–18 ml/kg; difficulty in performing 2 IADL or 1 basic ADL | Mild-moderate frailty: 100%                    |

|                                                |           |     |               |                                                                                                                   |                              |                          |                       |                                                             |                                            |
|------------------------------------------------|-----------|-----|---------------|-------------------------------------------------------------------------------------------------------------------|------------------------------|--------------------------|-----------------------|-------------------------------------------------------------|--------------------------------------------|
| Azad <i>et al</i> , 2008 <sup>42</sup>         | Canada    | 91  | 74.2 and 75.8 | Frail CHF older women; BMI: NR                                                                                    | Acute hospital and community | 6 weeks                  | 6w, 6m                | Screened by a CHF coordinator, frailty assessment undefined | Frail: 100% as determined by study authors |
| Blanc-Bisson <i>et al</i> , 2008 <sup>39</sup> | France    | 76  | 85.4 ±6.6     | Frail older men and women; BMI: 24.0 ±5.1 kg/m <sup>2</sup>                                                       | Acute hospital               | Until clinical stability | Clinically stable, 1m | NR                                                          | Frail: 100% as determined by study authors |
| Miller <i>et al</i> , 2006 <sup>40</sup>       | Australia | 100 | 83.5 ±2.8     | Frail older men and women with LL fracture; BMI: 22.1 ±4.3 kg/m <sup>2</sup> (ACG), 23.2 ± kg/m <sup>2</sup> (IG) | Acute hospital               | 3m                       | 3m                    | NR                                                          | Frail: 100%                                |

211 Abbreviations: BMI, Body Mass Index; w, Weeks; m, Months; y, Years; VO<sup>2</sup> max, maximal oxygen uptake; PPT, physical performance test; IADL, Instrumental Activities of Daily Living; ADL, Activities of Daily  
 212 Living; SHARE-FI, Survey of Health, Ageing and Retirement in Europe-Frailty Instrument; T2DM, Type 2 Diabetes Mellitus; CHF, Chronic Heart Failure; LL, Lower Limb, LOS, length of stay; IG, Intervention  
 213 group; UCG, Usual care group; ACG, Attention control group; NR, not reported; BMI presented in Mean ±standard deviation  
 214 Multiple articles reported from same study, study chosen to represent other reports from the same study: \*Luger *et al*<sup>31</sup> – Haider *et al* 2017<sup>32</sup>, Winzer *et al* 2019<sup>33</sup>, Kapan *et al* 2017<sup>34</sup>, Kapan *et al* 2017<sup>35</sup>; †Cameron *et al*  
 215 2013<sup>27</sup> – Fairhall *et al* 2012<sup>28</sup>, Fairhall *et al* 2014<sup>29</sup>, Fairhall *et al* 2015<sup>30</sup>; ‡Villareal *et al* 2011<sup>25</sup> – Armamento-Villareal 2016<sup>26</sup>

216 **Table 2. Assessment of methodology quality of included studies using Cochrane Risk of Bias 2.0 tool**

| Study                                             | Cochrane Risk of Bias 2.0 tool assessment domains |                                        |                      |                            |                                  |         |
|---------------------------------------------------|---------------------------------------------------|----------------------------------------|----------------------|----------------------------|----------------------------------|---------|
|                                                   | Randomisation process                             | Deviations from intended interventions | Missing outcome data | Measurement of the outcome | Selection of the reported result | Overall |
| Arrieta <i>et al</i> , 2019 <sup>35</sup>         | +                                                 | ?                                      | ?                    | ?                          | +                                | ?       |
| Rodriguez-Manas <i>et al</i> , 2019 <sup>41</sup> | +                                                 | ?                                      | +                    | ?                          | +                                | ?       |
| Niccoli <i>et al</i> , 2017 <sup>36</sup>         | ?                                                 | ?                                      | +                    | ?                          | +                                | ?       |
| Luger <i>et al</i> , 2016 <sup>*30</sup>          | +                                                 | +                                      | +                    | ?                          | +                                | ?       |
| Milte <i>et al</i> , 2016 <sup>37</sup>           | +                                                 | ?                                      | +                    | +                          | +                                | ?       |
| Cameron <i>et al</i> , 2013 <sup>†26</sup>        | +                                                 | ?                                      | +                    | +                          | +                                | ?       |
| Singh <i>et al</i> , 2012 <sup>38</sup>           | +                                                 | ?                                      | +                    | —                          | +                                | —       |
| Villareal <i>et al</i> , 2011 <sup>‡24</sup>      | +                                                 | +                                      | +                    | +                          | +                                | +       |
| Azad <i>et al</i> , 2008 <sup>42</sup>            | +                                                 | ?                                      | +                    | ?                          | +                                | ?       |
| Blanc-Bisson <i>et al</i> , 2008 <sup>39</sup>    | +                                                 | ?                                      | +                    | ?                          | +                                | ?       |
| Miller <i>et al</i> , 2006 <sup>40</sup>          | +                                                 | ?                                      | +                    | +                          | +                                | ?       |

217 Key: + = Low risk of bias; ? = Some concerns of risk of bias; — = High risk of bias

218 <sup>a</sup>Deviations from intended interventions (effect starting and adhering to intervention)

219 Multiple articles reported from same study, study chosen to represent other reports from the same study: \*Luger *et al*<sup>31</sup> – Haider *et al* 2017<sup>32</sup>, Winzer *et al* 2019<sup>33</sup>, Kapan *et al* 2017<sup>34</sup>, Kapan *et al* 2017<sup>35</sup>; †Cameron *et al*  
 220 2013<sup>27</sup> – Fairhall *et al* 2012<sup>28</sup>, Fairhall *et al* 2014<sup>29</sup>, Fairhall *et al* 2015<sup>30</sup>; ‡Villareal *et al* 2011<sup>25</sup> – Armamento-Villareal 2016<sup>26</sup>

221 **Table 3. Characteristics of exercise and nutrition intervention and controls of included studies**

| Study                                             | Exercise intervention                                                                                                                                                                                                                                                                                                                                                                                                                                                                                                                                                                        | Nutrition intervention                                                                                                                                                                                                                                                                                                                                                                                                                | Control intervention                                                                                                                                                                                                                 |
|---------------------------------------------------|----------------------------------------------------------------------------------------------------------------------------------------------------------------------------------------------------------------------------------------------------------------------------------------------------------------------------------------------------------------------------------------------------------------------------------------------------------------------------------------------------------------------------------------------------------------------------------------------|---------------------------------------------------------------------------------------------------------------------------------------------------------------------------------------------------------------------------------------------------------------------------------------------------------------------------------------------------------------------------------------------------------------------------------------|--------------------------------------------------------------------------------------------------------------------------------------------------------------------------------------------------------------------------------------|
| Arrieta <i>et al</i> , 2019 <sup>35</sup>         | <p><b>Type:</b> <i>Strength</i> – Intensity range from low to high, starting at 10 repetition per exercise (<b>UL, LL</b>) with option of progressive loading</p> <p><i>Aerobic, Flexibility, Balance</i> – intensity individualised</p> <p><b>Frequency:</b> 2 sessions/week, duration per session NR + home exercises duration NR</p> <p><b>Setting:</b> Inpatient (supervised, individual) + post-discharge (unsupervised, individual)</p> <p><b>Additional support reported:</b> Phone consults (by trainer 2x/month for first 6 months then monthly for 1 year); Education resource</p> | <p><b>Self-guided education resource:</b> Provided with French National Nutrition Health Program education booklet - <i>Programme National Nutrition Santé</i> (PNNS)</p>                                                                                                                                                                                                                                                             | <p><b>Usual care:</b> NR, variable between study sites</p> <p><b>Self-guided education resource:</b> Provided with French National Nutrition Health Program education booklet - <i>Programme National Nutrition Santé</i> (PNNS)</p> |
| Rodriguez-Manas <i>et al</i> , 2019 <sup>41</sup> | <p><b>Type:</b> <i>Strength</i> – 40-80% of estimated 1RM, 8–10 repetitions (<b>LL</b>)</p> <p><b>Frequency:</b> 2-weeks pretraining followed by 16-week program of 2 days/week; 20-30 minutes/sessions</p> <p><b>Setting:</b> Inpatient (supervised, individual)</p>                                                                                                                                                                                                                                                                                                                        | <p><b>Nutrition consultation/education:</b> 7 educational sessions, each 45 minutes, delivered by a trained researcher or nutritional therapist, twice a week over 3.5-4 weeks. Therapy focused on behavioural change, nutrition optimisation and diabetes.</p>                                                                                                                                                                       | <p><b>Usual care:</b> usual health care from local health system and/or general practitioner</p>                                                                                                                                     |
| Niccoli <i>et al</i> , 2017 <sup>36</sup>         | <p><b>Type:</b> <i>Strength, Aerobic, Flexibility, Balance</i> – intensity and target muscle group individualised based on patient's baseline assessment</p> <p><b>Frequency:</b> individualised based on patient's baseline assessment</p> <p><b>Setting:</b> Inpatient (supervised, individual)</p>                                                                                                                                                                                                                                                                                        | <p><b>Supplements:</b> Daily ONS with 24g whey protein per day (<i>9g breakfast, 7.5g at lunch and dinner</i>) in addition to usual diet</p>                                                                                                                                                                                                                                                                                          | <p><b>Usual care:</b> usual medical care, no whey protein supplementation.</p> <p><b>Individual supervised exercise:</b> Individualised exercises as per intervention.</p>                                                           |
| Luger <i>et al</i> , 2016 <sup>*30</sup>          | <p><b>Type:</b> <i>Strength</i> – 2 sets of 15 repetitions (<b>UL, LL</b>) until muscular exhaustion,</p> <p><b>Frequency:</b> 2x/week, &gt;30 minutes each session</p> <p><b>Setting:</b> Post-discharge (supervised, individual)</p> <p><b>Additional support reported:</b> Physical education (2-3 times/week, 30 minutes each session); Exercise education resource (demonstration DVD); Motivational interviewing.</p>                                                                                                                                                                  | <p><b>Nutrition consultation/education</b> Trained lay volunteers visit twice/week for dietary discussions aimed at achieving adequate energy, protein and other nutrients. Taught how to enrich food with protein, recipes, healthy for life plate which consists of food-cards and a play board.</p> <p><b>Motivational interviewing:</b> Techniques utilised with nutrition goal setting and tools to reinforce self-efficacy.</p> | <p><b>Usual care with attention control:</b> Trained lay "buddies" visit twice a week but doing a portfolio of possible activities (go out, have a chat, and sharing interest), especially cognitive training</p>                    |
| Milte <i>et al</i> , 2016 <sup>37</sup>           | <p><b>Type:</b> <i>Strength, Balance (Otago exercise program)</i> – Intensity and repetitions NR, at the discretion of the treating physiotherapist (<b>LL</b>)</p>                                                                                                                                                                                                                                                                                                                                                                                                                          | <p><b>Nutrition consultation/education:</b> Individualised nutrition therapy aimed at</p>                                                                                                                                                                                                                                                                                                                                             | <p><b>Usual care:</b> Usual rehabilitation program recommended during hospitalisation, social visits</p>                                                                                                                             |



|                                              |                                                                                                                                                                                                                                                                                                                                                                                                                                      |                                                                                                                                                                                                                                                                                                                                                                                                                                                                                     |                                                                                                                                                                                                                                     |
|----------------------------------------------|--------------------------------------------------------------------------------------------------------------------------------------------------------------------------------------------------------------------------------------------------------------------------------------------------------------------------------------------------------------------------------------------------------------------------------------|-------------------------------------------------------------------------------------------------------------------------------------------------------------------------------------------------------------------------------------------------------------------------------------------------------------------------------------------------------------------------------------------------------------------------------------------------------------------------------------|-------------------------------------------------------------------------------------------------------------------------------------------------------------------------------------------------------------------------------------|
|                                              | <p><b>Frequency:</b> 3 times/week, 20-30minutes/session for 12 weeks</p> <p><b>Setting:</b> Inpatient (supervised, individual) + post-discharge (supervised, individual)</p>                                                                                                                                                                                                                                                         | <p>improving energy and protein intake to meet requirements by dietitian who visits fortnightly.</p> <p><b>Meal program:</b> ordered as deemed necessary by dietitian.</p> <p><b>Supplements:</b> commercial ONS recommended if needed by dietitian</p>                                                                                                                                                                                                                             | <p>weekly from trial staff and generic nutrition, exercise and falls prevention information</p>                                                                                                                                     |
| Cameron <i>et al</i> , 2013 <sup>†26</sup>   | <p><b>Type:</b> <i>Strength, Balance, Aerobic + WEBB program</i> – intensity and target muscle groups NR</p> <p><b>Frequency:</b> Exercises prescribed 3-5x/week (with 2 sessions for mobility training) for 1 year, supported by up to 10 home visits</p> <p><b>Setting:</b> Post-discharge (supervised, individual) + (unsupervised, individual)</p>                                                                               | <p><b>Nutrition consultation/education:</b> Clinical evaluation of nutritional intake at home. A series of diet intervention as needed by dietitian.</p> <p><b>Meal program:</b> ordered as deemed necessary by dietitian.</p> <p><b>Supplements:</b> commercial ONS recommended if needed by dietitian</p>                                                                                                                                                                         | <p><b>Usual care:</b> usual health care during hospitalisation and from their general practitioner and community services after discharge</p>                                                                                       |
| Singh <i>et al</i> , 2012 <sup>38</sup>      | <p><b>Type:</b> <i>Strength</i> – 80% of most recent 1RM or RPE &lt;15, 3 sets of 8 repetitions (UL, LL)</p> <p><b>Frequency:</b> 2 sessions/week, session duration NR, over average of 80 sessions in 1 year, start as early as post assessment in hospital or at home.</p> <p><b>Setting:</b> Inpatient (supervised, individual) + (supervised, group-based)</p> <p><b>Additional support reported:</b> Monthly phone consults</p> | <p><b>Nutrition consultation/education:</b> Counselling on increase in diet quality, frequency NR</p> <p><b>Supplements:</b> ONS +/- dietary advice to increase daily energy (400-600 kcal) and protein (20 g/day) intake.</p> <p>For those calcium or vit-D deficient (52%), 12 months of vit-D orally (1000 IU/day) or calcium (1200 mg/d) and vit-D combination supplement</p> <p><b>Self-guided nutrition resource:</b> Food sources of calcium, vitamin D and sun exposure</p> | <p><b>Usual care:</b> standard service offered for hip fracture in the area health service, including orthogeriatric care, rehabilitation service, other medical and allied health consultation as required, and physiotherapy.</p> |
| Villareal <i>et al</i> , 2011 <sup>‡24</sup> | <p><b>Type:</b> <i>Strength</i> – 65% of 1RM; 8-12 repetitions of each exercise (UL, LL) with options for progression</p> <p><i>Aerobic</i>, ~65% of peak HR with gradual progression to 70-85%</p> <p><i>Flexibility, Balance</i></p> <p><b>Frequency:</b> 90 minutes, 3 sessions/week</p> <p><b>Setting:</b> Inpatient (supervised, group-based)</p>                                                                               | <p><b>Nutrition consultation/education:</b> prescribed a balanced diet with energy deficit of 500-750 kcal/d from daily energy requirement, 1 g of high-quality protein/kgbw/d. Weekly group consultation with dietitian for adjustments of their caloric intake, goals and behavioral therapy.</p> <p><b>Supplements:</b> 1500 mg of calcium/d day and ~1000 IU vitamin D/d</p>                                                                                                    | <p><b>Usual care:</b> General healthy lifestyle advice</p> <p><b>Supplements:</b> 1500 mg of calcium/d day and ~1000 IU vitamin D/d</p>                                                                                             |
| Azad <i>et al</i> , 2008 <sup>42</sup>       | <p><b>Type:</b> ‘Comprehensive exercise program’; type, intensity and target muscle groups NR</p> <p><b>Frequency:</b> 11 sessions over 6 weeks + NR home exercises</p> <p><b>Setting:</b> Inpatient (supervised, group-based), post-discharge (unsupervised, individual)</p>                                                                                                                                                        | <p><b>Nutrition consultation/education:</b> 3 sessions of individualized counselling about diet and nutrition in the management of CHF by dietitian</p>                                                                                                                                                                                                                                                                                                                             | <p><b>Usual care:</b> Optimal medical care</p>                                                                                                                                                                                      |



|                                                |                                                                                                                                                                                                                                                                                                                                                       |                                                                                                                                                                                                                                                                  |                                                                                                                                                                                                                                                                                              |
|------------------------------------------------|-------------------------------------------------------------------------------------------------------------------------------------------------------------------------------------------------------------------------------------------------------------------------------------------------------------------------------------------------------|------------------------------------------------------------------------------------------------------------------------------------------------------------------------------------------------------------------------------------------------------------------|----------------------------------------------------------------------------------------------------------------------------------------------------------------------------------------------------------------------------------------------------------------------------------------------|
| Blanc-Bisson <i>et al</i> , 2008 <sup>39</sup> | <p><b>Type:</b> <i>Strength</i> – intensity (RM) NR, 10 x repetitions each exercise (<b>LB</b>)</p> <p><b>Frequency:</b> 30 minutes, twice/day, five days/week</p> <p><b>Setting:</b> Inpatient (supervised, individual)</p>                                                                                                                          | <p><b>Meal program:</b> Geriatric hospital meals of 1800-2000 kcal/d</p> <p><b>Supplements:</b> 1 daily ONS of 200 kcal and 15g protein</p>                                                                                                                      | <p><b>Usual care:</b> From day 3 to 6, patients started to walk with human help with or without technical assistance in the physiotherapy room for three sessions per week until discharge.</p> <p><b>Individual supervised exercise:</b> Physiotherapy continued at home for one month.</p> |
| Miller <i>et al</i> , 2006 <sup>40</sup>       | <p><b>Type:</b> <i>Strength</i> – intensity (RM) NR, 2 sets of 8 repetitions (<b>LL</b>) with progressive loading, at the discretion of the treating physiotherapist</p> <p><b>Frequency:</b> 3 times/week, 20-30minutes/session for 12 weeks</p> <p><b>Setting:</b> Inpatient (supervised, individual) + Post-discharge (supervised, individual)</p> | <p><b>Nutrition consultation/education:</b> Individualised nutrition therapy by dietitian.</p> <p><b>Supplements:</b> single type of ONS to cover the shortfall between individual estimated energy and protein requirements and actual intake over 42 days.</p> | <p><b>Usual care with attention control group</b> - received tri-weekly visits weeks 1-6, then weekly visits 7-12 to account for the possibility of the attention effect.</p>                                                                                                                |

Abbreviations: *UL*, Upper Limb; *LL*, Lower Limb; *NR*, not reported; *HR*, Heart Rate; *CHF*, Chronic Heart Failure; *ONS*, Oral Nutrition Supplements, *RM*, Repetition Max; *DVD*, Digital Versatile Disc; *WEBB*, Weight-Bearing for Better Balance exercise program is designed to improve mobility, increase physical activity and prevent falls; *Otago exercise program* - series of 17 strength and balance at-home exercises for fall prevention program in frail older adults.

Multiple articles reported from same study, study chosen to represent other reports from the same study: \*Luger *et al*<sup>31</sup> – Haider *et al* 2017<sup>32</sup>, Winzer *et al* 2019<sup>33</sup>, Kapan *et al* 2017<sup>34</sup>, Kapan *et al* 2017<sup>35</sup>; †Cameron *et al* 2013<sup>27</sup> – Fairhall *et al* 2012<sup>28</sup>, Fairhall *et al* 2014<sup>29</sup>, Fairhall *et al* 2015<sup>30</sup>; \*Villareal *et al* 2011<sup>25</sup> – Armamento-Villareal 2016<sup>26</sup>

1  
2  
3  
4  
5  
6  
7  
8  
9  
10  
11  
12  
13  
14  
15  
16  
17  
18  
19  
20  
21  
22  
23  
24  
25  
26  
27  
28  
29  
30  
31  
32  
33  
34  
35  
36  
37  
38  
39  
40  
41  
42  
43  
44  
45  
46

1  
2  
3 227 received training for the study.<sup>32</sup> All studies included strength exercises as part of their  
4  
5 228 interventions. Three studies described guidance on training intensity based on repetition  
6  
7 229 maximum's (RM) between 40-80%.<sup>26, 40, 43</sup> Other components of exercise programs included  
8  
9 230 aerobic fitness,<sup>26, 28, 37, 38</sup> flexibility,<sup>26, 37, 38</sup> and/or balance.<sup>26, 28, 37, 38</sup> The frequency of  
10  
11 231 interventions ranged from two<sup>32, 37, 40, 43, 44</sup> to five<sup>28, 41</sup> sessions a week, lasting between 20<sup>39, 42,</sup>  
12  
13 232 <sup>43</sup> to 90 minutes<sup>26</sup> each. The duration of exercise intervention varied from six weeks<sup>44</sup> to one  
14  
15 233 year.<sup>26, 28, 37, 40</sup>

### 20 234 *Characteristics of nutrition intervention component*

21  
22  
23 235 Characteristics of the nutritional interventions used in studies, are outlined in Table 3, and  
24  
25 236 included combinations of the following: nutrition consultation/education (n=8),<sup>26, 28, 32, 39-42, 44</sup>  
26  
27 237 oral nutrition and/or multivitamin/mineral supplements (n=7),<sup>26, 28, 38-42</sup> meal programs  
28  
29 238 (n=3),<sup>28, 39, 41</sup> self-guided education materials (n=2),<sup>37, 40</sup> and motivational interviewing (n=1).<sup>32</sup>  
30  
31 239 The most common combination of nutrition intervention was consultation/education with oral  
32  
33 240 nutrition and/or multivitamin/mineral supplements (n=5).<sup>26, 39, 42, 44</sup> Five of nine nutrition  
34  
35 241 consultation/education interventions were performed by dietitians.<sup>26, 39, 42, 44</sup> Other studies used  
36  
37 242 trained lay volunteers,<sup>32</sup> a researcher/nutrition therapist or did not specify a skill set for who  
38  
39 243 delivered the consultation/education.<sup>43</sup>

40  
41  
42  
43  
44 244 All counselling/education-based interventions aimed to achieve adequate dietary targets for  
45  
46 245 energy, protein and other nutrients. One study on obese frail participants aimed for calorie  
47  
48 246 deficit but ensured that all achieved 1g/kg/day of protein in the intervention group.<sup>26</sup> The  
49  
50 247 reported frequency of consultations ranged from twice a week<sup>32, 43</sup> to fortnightly.<sup>39, 42</sup> Oral  
51  
52 248 nutrition supplements (ONS) were the most common supplements prescribed to intervention  
53  
54 249 group participants (n=7),<sup>26, 38, 39, 41, 42, 44</sup> typically providing 200-300kcal and 12-24g protein  
55  
56 250 per serve with a frequency of consumption up to seven times a week<sup>38, 41</sup> or as prescribed by  
57  
58  
59  
60

1  
2  
3 251 dietitians<sup>26, 39, 42, 44</sup> to cover any identified deficits between individually estimated energy and  
4  
5 252 protein requirements and actual intake. Calcium and vitamin D were the two most commonly  
6  
7 253 supplemented micronutrients <sup>26, 40</sup> at doses in the range of 1200-1500mg/d and 1000IU/d,  
8  
9  
10 254 respectively. Meal programs were either delivered as inpatient specialised geriatric meals  
11  
12 255 providing 1800-2000kcal/d or home-delivered meal programs.<sup>28, 39, 41</sup>

### 15 256 *Frailty outcomes*

17  
18 257 Data on frailty outcomes were available for quantitative analysis from three studies.<sup>28, 32, 38</sup> The  
19  
20 258 meta-analysis is presented in Figure 2 and suggested that participants who received exercise-  
21  
22 259 nutrition intervention had a greater reduction in frailty score compared to those who received  
23  
24 260 standard care (SMD 0.25; 95% CI 0.03-0.46; P=0.02); no heterogeneity was observed (I<sup>2</sup>=0%;  
25  
26 261 P=0.58).

### 30 262 *Physical functioning outcomes*

#### 33 263 *Short Physical Performance Battery (SPPB)*

35  
36 264 Data on the SPPB were available for quantitative analysis from 3 studies, <sup>28, 43, 46</sup> with results  
37  
38 265 from the meta-analysis presented in Figure 3. Participants who received exercise-nutrition  
39  
40 266 intervention had a statistically significant improvement in SPPB score, compared to those that  
41  
42 267 received standard care (MD 0.48; 95% CI 0.12-0.84; P=0.008), with moderate heterogeneity<sup>19</sup>  
43  
44 268 observed (I<sup>2</sup> = 52%; P=0.13).<sup>20, 32, 33</sup> The analysis of SPPB components across all studies  
45  
46 269 showed no statistically significant differences in gait speed<sup>28, 38, 43, 46</sup> (MD 0.02; 95% CI -0.02  
47  
48 270 to 0.06; P=0.31; I<sup>2</sup>=37%, P=0.19) or balance <sup>28, 43, 46</sup> (MD 0.13; 95% CI -0.04 to 0.30; P=0.14;  
49  
50 271 I<sup>2</sup>=0%, P=0.22) between groups. There were significantly greater improvements in chair stand  
51  
52 272 test results<sup>28, 43, 46</sup> in the intervention group as compared to the control (MD 0.26; 95% CI 0.09-  
53  
54 273 0.43; P=0.003; I<sup>2</sup> = 23%, P=0.23). Two studies that were not suitable for meta-analysis (as data  
55  
56 274 could not be provided by authors<sup>37</sup> and a different measurement was used<sup>26</sup>) are instead

1  
2  
3 275 qualitatively described. Arrieta et al reported no significant differences between groups in the  
4  
5 276 percentage of participants who had a  $\geq 1$  point decrease in SPPB score at one and two years  
6  
7 277 ( $P=0.772$ ,  $P=0.057$ , respectively).<sup>37</sup> With use of an alternative measure of physical function  
8  
9 278 (modified physical performance test – includes book lift, put on and take off a coat, pick up a  
10  
11 279 penny, chair rise, turn 360, 50-foot walk, 10-steps of stairs, four flight of stairs and progressive  
12  
13 280 Romberg test), Villareal et al<sup>26</sup> reported a significant improvement in their exercise- nutrition  
14  
15 281 interventions group as compared to exercise only ( $P=0.04$ ), nutrition only ( $P<0.001$ ), or  
16  
17 282 controls.

### 22 283 Activities of daily living

25 284 Data on activities of daily living (ADL) from three studies<sup>29, 34, 43</sup> underwent meta-analysis,  
26  
27 285 from which participants who received exercise-nutrition intervention were determined to have  
28  
29 286 greater ADL independence post-intervention than those who received standard care (SMD  
30  
31 287 1.06; 95% CI 0.91-1.20;  $P<0.001$ , Figure 3). However, high heterogeneity was observed  
32  
33 288 ( $I^2=96\%$ ,  $P<0.001$ ). As such, additional random effects model was performed (SMD 0.80; 95%  
34  
35 289 CI 0.00-1.60;  $P<0.001$ ; supplement 2). Data from two studies<sup>41, 44</sup> were unavailable to be  
36  
37 290 included the meta-analysis. One study<sup>40</sup> was excluded due to high risk of bias in outcome  
38  
39 291 measurements but reported that basic ADL declined lesser ( $P<0.0001$ ) in the intervention vs  
40  
41 292 control group.

### 46 293 Muscle strength

49 294 The meta-analysis showed no statistically significant differences in muscle strength between  
50  
51 295 participants who received exercise-nutrition intervention and those that received standard care,  
52  
53 296 when handgrip strength was analysed from three studies<sup>28, 38, 46</sup> (MD 0.46; 95% -0.38 to 0.85;  
54  
55 297  $P=0.28$ ;  $I^2=49\%$ ,  $P=0.14$ ), or, when of handgrip and quadriceps strength was combined ( $n=4$   
56  
57  
58  
59  
60

1  
2  
3 298 studies)<sup>28, 38, 43, 46</sup> using a published methodology<sup>47</sup> (SMD 0.10; 95% CI -0.09 to 0.29; P=0.24,  
4  
5 299 I<sup>2</sup>=28%, P=0.30) (Figure 3).  
6  
7

### 8 300 Nutrition, Cognition and Biomarkers outcomes

10  
11 301 Most studies assessed participants' nutritional status at baseline, while only one study<sup>32</sup>  
12  
13 302 assessed it as an outcome. Luger et al reported a 1.54-point improvement in the MNA long  
14  
15 303 form in participants who received exercise-nutrition intervention compared to those who  
16  
17 304 received standard care (95% CI 0.51-2.56, P=0.004). Combined exercise-nutrition intervention  
18  
19 305 did not affect cognitive status (mini-mental state examination (MMSE)) or mood (geriatric  
20  
21 306 depression scale (GDS)).<sup>44</sup> Armamento-Villareal et al reported a significant decrease in total  
22  
23 307 and free estradiol in their frail obese older men (attributed to weight loss from lifestyle change  
24  
25 308 rather than the intervention), without a clinically meaningful increase in total or free  
26  
27 309 testosterone levels.<sup>27</sup> In one study that reported C-reactive protein (CRP) levels, this  
28  
29 310 inflammatory marker remained stable in the exercise-nutrition intervention group participants,  
30  
31 311 compared to an increase in the social support control group at the end of 12 weeks (P=0.04).<sup>48</sup>  
32  
33  
34  
35

### 36 312 Quality of life and falls

37  
38  
39  
40 313 Three studies<sup>31, 36, 39</sup> that evaluated quality of life could not find statistically significant  
41  
42 314 improvement in the intervention as compared to the control group though Milte et al<sup>39</sup> found a  
43  
44 315 trend favouring intervention. Fairhall et al<sup>30</sup> found that risk factors related to falls (physical  
45  
46 316 tests as mentioned above) but not rate of falls were reduced while Kapan et al<sup>35</sup> found that a  
47  
48 317 10% reduction in fear of falling as ascertained by the falls efficacy scale.  
49  
50

### 51 318 Economic analyses

52  
53  
54  
55 319 Only two studies examined the cost-effectiveness of their exercise-nutrition intervention.  
56  
57 320 Fairhall et al<sup>31</sup> reported no additional resource cost in terms of medical (P=0.87) or nursing and  
58  
59  
60

1  
2  
3 321 health professional appointments (P=0.32). Similarly, Milte et al<sup>39</sup> reported no cost differences  
4  
5 322 between groups (P=0.868).  
6  
7  
8 323

## 10 324 **Discussion**

### 13 325 *Main findings*

16 326 The present systematic review and meta-analysis present updated evidence that suggest  
17 327 exercise with nutrition intervention to be effective on frailty and frailty-related physical  
18 328 outcomes in hospitalised older adult patients. When compared to standard care, combined  
19 329 exercise-nutrition interventions improved frailty status as determined by the Fried Frailty  
20 330 criteria<sup>2</sup> and the SHARE-FI.<sup>45</sup> They also improved physical function according to the SPPB  
21 331 and ADLs. Only one study measured and found significant improvement in nutrition score.<sup>32</sup>  
22 332 The two economic analyses included in this review suggested that combined exercise-nutrition  
23 333 interventions, though more effective, were no more costly than standard care.

24 334 Existing reviews of exercise and nutrition interventions have highlighted heterogeneity in study  
25 335 protocols (including intervention descriptions), which limits potential for quantitative analysis.  
26 336 They have also focussed on community dwelling participants.<sup>49</sup> This study is novel in  
27 337 reviewing a more vulnerable hospitalised population that has not been previously investigated,  
28 338 and specifically targeting pre-frail or frail older adults. However, out of five studies in this  
29 339 review that used a validated frailty assessment tool, only three had assessed frailty at outcome,  
30 340 and available for quantitative analysis. This could be because the frailty phenotype was first  
31 341 described 2001, with a systematic evaluation of frailty tools a decade later.<sup>2, 50</sup> Accordingly,  
32 342 the authors decided to additionally evaluate frailty components such as physical function,  
33 343 nutrition, cognition and biomarkers as baseline and outcome measures. Although not specific

1  
2  
3 344 to frailty, these measures provide insights to the effectiveness of exercise-nutrition  
4  
5 345 interventions on improving various components of frailty and may inform future studies.  
6  
7

8 346 Previous reviews have found mixed results<sup>49</sup> or have concluded that evidence for combined  
9  
10 347 interventions is limited but increasing.<sup>51</sup> Our results concur with RCTs of exercise-nutrition  
11  
12 348 interventions conducted in community dwelling frail older adults. Tarazona-santabalbina and  
13  
14 349 colleagues found significant improvement in SPPB in participants on a 24-weeks exercise-  
15  
16 350 nutrition intervention as compared to controls in a community dwelling frail population –  
17  
18 351 intervention group  $9.5 \pm 1.8$  vs control group  $7.1 \pm 2.8$ ,  $P=0.007$ .<sup>52</sup> Similarly, Kim et al reported  
19  
20 352 a 12-weeks, community-based study of frail older adults that found SPPB to remain stable in  
21  
22 353 the intervention group, while it decreased by 12.5% (1 point) in controls ( $P=0.039$ ).<sup>53</sup> Our meta-  
23  
24 354 analysis of individual components of the SPPB suggest that the significant improvements in  
25  
26 355 functional muscle strength as represented by the chair stand component of the SPPB may be  
27  
28 356 pivotal to the increase in overall SPPB post intervention, and reflect the functional lower limb  
29  
30 357 strength training focus of the exercise interventions. However, the meta-analysis of handgrip  
31  
32 358 +/- quadriceps strength did not produce a similar trend. Diversity in outcome measures for  
33  
34 359 frailty and frailty-related domains like physical function is a challenge for comparative  
35  
36 360 analyses between studies. Future studies should carefully consider measure responsiveness  
37  
38 361 when selecting outcome tools.  
39  
40  
41  
42  
43  
44  
45

46 362 Nutrition is another important domain within frailty. Yet the majority of studies included in  
47  
48 363 this review only reported nutrition status at baseline, with only one study reporting follow-up  
49  
50 364 nutrition assessment at the end of the intervention.<sup>32</sup> Luger et al described an improvement in  
51  
52 365 nutrition status in a sample of at risk malnourished pre-frail/frail patients (thus likely to benefit  
53  
54 366 most from nutrition therapy). As hospitalised patients have greater energy deficits due to  
55  
56 367 catabolic stress of acute illness, they are a population that requires careful determination of  
57  
58 368 energy/protein requirements and in whom additive effects of nutrition supplementation to  
59  
60



1  
2  
3 369 exercise may have greatest impact on outcomes such as muscle strength.<sup>52</sup> As none of the  
4  
5 370 studies in the present review reported on energy deficits, it is not known whether these patients  
6  
7  
8 371 received adequate replacement. Nutrition supplementation should also not be confused with  
9  
10 372 nutrition or diet modifications. The provision of ONS alone is unlikely to augment diet  
11  
12 373 adequacy as completely as diet modification that involves a wider range of nutrients and non-  
13  
14 374 nutrients<sup>54</sup> especially when led by dietitians.<sup>55, 56</sup>

15  
16  
17 375 For both exercise and nutrition based interventions, an understanding of patient participation  
18  
19 376 dynamics and compliance is required because of how they can impact on effectiveness.<sup>57</sup> Only  
20  
21 377 five studies in this review reported attendance to program/home visits or phone calls or  
22  
23 378 adherence to prescribed exercise/diet or related advice at rates of 50-90% and 70-93% for  
24  
25 379 nutrition and exercise interventions, respectively. Issues with participants resulting in poorer  
26  
27 380 compliance were not reported in these articles, such that the authors recommend that future  
28  
29 381 studies explore barriers and enablers to adherence in multi-modal interventions.

30  
31  
32  
33  
34 382 Cognition is another critical domain in the multidimensional nature of frailty. Exercise<sup>58</sup> and  
35  
36 383 nutrition interventions<sup>59</sup> may have a far reaching, positive effect on cognition in older adults.  
37  
38 384 However, there was no evidence of an impact on cognition from a single study<sup>41</sup> in the present  
39  
40 385 review. This is consistent with a network meta-analysis of 13 RCTs that examined exercise and  
41  
42 386 nutrition interventions in frail older adults.<sup>11</sup> One suggested explanation is that different  
43  
44 387 neuronal mechanisms could result in a misfit between combinatory approaches of nutrition and  
45  
46 388 physical interventions<sup>60</sup> highlighting that more in-depth research is required.<sup>61</sup>

47  
48  
49  
50  
51 389 The economic delivery of new interventions and models of care is important to a range of  
52  
53 390 stakeholders<sup>62</sup> but has been infrequently conducted in previous studies.<sup>49</sup> In this review, only  
54  
55 391 two out of 11 studies included an economic analysis, with the majority of costs coming from  
56  
57 392 delivery of exercise and nutrition support. The types of consumables that were considered in  
58  
59  
60

1  
2  
3 393 analyses included nutrition supplements, ankle/wrist weights, mobility aids and medications.  
4  
5 394 Elements of service provision that were considered included community, rehabilitation,  
6  
7 395 residential and transition care service use, which were often reduced and contributed to the net  
8  
9 396 result. The results of this review support previous findings of beneficial effects on frailty-  
10  
11 397 related outcomes, without increased costs.<sup>49</sup> However, results should be interpreted with  
12  
13 398 caution as omission of other services (such as medication reviews) within a multimodal  
14  
15 399 intervention can impact costings, and there are instances where interventions have not been  
16  
17 400 found to be more-cost effective than usual care.<sup>63</sup> The approach of streamlining and  
18  
19 401 reorganising existing services rather than creating entirely new systems may be preferred.  
20  
21  
22  
23

#### 24 402 *Strength and weakness*

25  
26  
27 403 This study was robust and underwent peer review by an academic librarian. We did not have a  
28  
29 404 language restriction on the search, and we did not find nor include studies in other languages.  
30  
31 405 We chose to use of an updated version of the Cochrane risk of bias tool (RoB 2), which  
32  
33 406 addresses issues of confusion common to its first version.  
34  
35  
36

37 407 By focussing on exercise-nutrition interventions only, this study addresses a gap as identified  
38  
39 408 in a recent review of multi-domain interventions in pre-frail or frail elderly adults, in which  
40  
41 409 some interventions may have been too broad to directly impact frailty, and functional and  
42  
43 410 cognitive status.<sup>51</sup> Multidisciplinary team based approaches remain recommended and are a  
44  
45 411 bedrock of quality standard care; they may also already include goals for exercise and nutrition  
46  
47 412 such that it may be difficult to solely attribute outcomes to a targeted but supplementary  
48  
49 413 exercise-nutrition program. Social relationships affect health behaviour and physical health,<sup>64</sup>  
50  
51 414 such that intervention benefits may in part come from social interactions. Nevertheless, several  
52  
53 415 studies<sup>28, 32, 42</sup> have demonstrated significant improvements even when control participants are  
54  
55 416 provided with the social aspect of an intervention, such that exercise and nutrition are expected  
56  
57  
58  
59  
60

1  
2  
3 417 to improve outcomes independent of social interactions. Among the three studies<sup>28, 32, 38</sup>  
4  
5 418 included in the meta-analysis of reduction in frailty score, one study<sup>32</sup> included patients from  
6  
7 419 community. However, when combined with data from the other two studies,<sup>28, 38</sup> participants  
8  
9 420 recruited from the hospital made up majority (~80%) of the entire cohort in that meta-analysis.  
10  
11  
12

### 13 421 *Implications and future research*

14  
15  
16 422 This review is a useful resource for researchers and multi-disciplinary clinicians who are  
17  
18 423 seeking to generate evidence or evaluate their practices of exercise-nutrition interventions for  
19  
20 424 frail hospitalised older adults. The authors interpretation of the quality of studies in this review  
21  
22 425 is that the evidence base is low, but the inclusion of future studies may change estimates of the  
23  
24 426 intervention effects. While blinding of participants to the intervention is acknowledged to be  
25  
26 427 difficult, future studies should be adequately powered, use allocation concealment with  
27  
28 428 blinding outcome assessors and data analysts at least. Improved reporting of intervention  
29  
30 429 details is also required,<sup>65</sup> which may assist in answering research questions around the optimal  
31  
32 430 duration, dose, modality and timing of intervention(s) across the hospital to community  
33  
34 431 continuum. In the present review, potential beneficial effects of combined interventions could  
35  
36 432 have been negated given the short durations reported by most studies. Thus, future studies may  
37  
38 433 be extended for >6-12 months, or employ principles of chronic condition self-management,<sup>66</sup>  
39  
40 434 to determine delayed improvements and achieve long-lasting sustainability of interventions.  
41  
42 435 The lack of evidence from non-western countries, or low- and middle-income countries  
43  
44 436 indicate the need for research to be conducted in those populations too. There are many ongoing  
45  
46 437 research activities relevant to the scope of this review,<sup>67-70</sup> yet only one has reported plans for  
47  
48 438 economic analysis in the study protocol.<sup>67</sup> Economic evaluations can expand current evidence  
49  
50 439 on the sustainability of incorporating such services within resource-constrained healthcare  
51  
52 440 systems.  
53  
54  
55  
56  
57  
58  
59  
60

1  
2  
3 441 *Conclusion*  
4  
5

6 442 Exercise-nutrition interventions that start while patients are admitted to hospital and continue  
7  
8 443 in the community/post-hospital, or, commence early post discharge, appear to be effective in  
9  
10 444 reducing frailty and some frailty-related physical indicators. Though effective, the quality of  
11  
12 445 the evidence in this review is low as most studies included had some concerns for risk of bias.  
13  
14 446 Given the paucity of high-quality studies on the effectiveness of combined exercise-nutrition  
15  
16 447 interventions on hospitalised frail older adult patients, more robust research that pays attention  
17  
18 448 to effect of assignment to intervention is needed to increase the confidence in results.  
19  
20  
21  
22

23 449 **Acknowledgements**  
24  
25

26 450 The authors would like to thank the librarians at Gus Fraenkel Medical Library, Flinders  
27  
28 451 University for their support with the study.  
29  
30

31 452 **Author Contributions**  
32  
33

34 453 All authors contributed to the conception and design of review. CH and YS read and screened  
35  
36 454 titles and abstract of potentially relevant studies. CH and YS evaluated the selected studies and  
37  
38 455 performed data extraction. CH, MM, AY, CB reviewed the evidence. RW provided statistical  
39  
40 456 expertise on meta-analyses. CH drafted the article and all authors provided critical revisions  
41  
42 457 and final approval of the manuscript. All authors had access to the data in the study and can  
43  
44 458 take responsibility for the integrity of the reported findings. All authors fulfil the ICMJE criteria  
45  
46 459 for authorship.  
47  
48  
49  
50

51 460 **Funding**  
52  
53

54 461 This research received no specific grant from any funding agency in the public, commercial or  
55  
56 462 not-for-profit sectors. CH is supported by the Australian Government Research Training  
57  
58 463 Program scholarship.  
59  
60

1  
2  
3 464 **Competing interests**  
4  
5

6 465 None declared.  
7  
8

9 466 **Patient consent**  
10  
11

12 467 Not required.  
13  
14

15 468 **Data sharing statement**  
16  
17

18 469 Details of the excluded papers are available from the corresponding author upon request.  
19  
20

21 470 **References**  
22  
23

- 24 471 1. Le Cossec C, Perrine AL, Beltzer N, Fuhrman C, Carcaillon-Bentata L. Pre-Frailty,  
25 472 Frailty, and Multimorbidity: Prevalences and Associated Characteristics from Two French  
26 473 National Surveys. *J Nutr Health Aging*. 2016;20(8):860-9.  
27 474 2. Fried LP, Tangen CM, Walston J, Newman AB, Hirsch C, Gottdiener J, et al. Frailty in  
28 475 older adults: evidence for a phenotype. *J Gerontol A Biol Sci Med Sci*. 2001;56(3):M146-56.  
29 476 3. Considine J, Fox K, Plunkett D, Mecner M, M OR, Darzins P. Factors associated with  
30 477 unplanned readmissions in a major Australian health service. *Aust Health Rev*. 2019;43(1):1-  
31 478 9.  
32 479 4. Sirven N, Rapp T. The cost of frailty in France. *Eur J Health Econ*. 2017;18(2):243-53.  
33 480 5. Thompson MQ, Theou O, Karnon J, Adams RJ, Visvanathan R. Frailty prevalence in  
34 481 Australia: Findings from four pooled Australian cohort studies. *Australas J Ageing*.  
35 482 2018;37(2):155-8.  
36 483 6. Giné-Garriga M, Roqué-Fíguls M, Coll-Planas L, Sitja-Rabert M, Salvà A. Physical  
37 484 exercise interventions for improving performance-based measures of physical function in  
38 485 community-dwelling, frail older adults: a systematic review and meta-analysis. *Arch Phys Med*  
39 486 *Rehabil*. 2014;95(4):753-69. e3.  
40 487 7. Ng TP, Feng L, Nyunt MS, Feng L, Niti M, Tan BY, et al. Nutritional, Physical,  
41 488 Cognitive, and Combination Interventions and Frailty Reversal Among Older Adults: A  
42 489 Randomized Controlled Trial. *Am J Med*. 2015;128(11):1225-36.e1.  
43 490 8. Hsieh TJ, Su SC, Chen CW, Kang YW, Hu MH, Hsu LL, et al. Individualized home-  
44 491 based exercise and nutrition interventions improve frailty in older adults: a randomized  
45 492 controlled trial. *Int J Behav Nutr Phys Act*. 2019;16(1):119.  
46 493 9. Lozano-Montoya I, Correa-Perez A, Abraha I, Soiza RL, Cherubini A, O'Mahony D, et  
47 494 al. Nonpharmacological interventions to treat physical frailty and sarcopenia in older patients:  
48 495 a systematic overview - the SENATOR Project ONTOP Series. *Clin Interv Aging*.  
49 496 2017;12:721-40.  
50 497 10. Abizanda P, López MD, García VP, Estrella JdD, da Silva González Á, Vilardell NB,  
51 498 et al. Effects of an Oral Nutritional Supplementation Plus Physical Exercise Intervention on  
52 499 the Physical Function, Nutritional Status, and Quality of Life in Frail Institutionalized Older  
53 500 Adults: The ACTIVNES Study. *J Am Med Dir Assoc*. 2015;16(5):439.e9-.e16.  
54  
55  
56  
57  
58  
59  
60

11. Negm AM, Kennedy CC, Thabane L, Veroniki AA, Adachi JD, Richardson J, et al. Management of Frailty: A Systematic Review and Network Meta-analysis of Randomized Controlled Trials. *J Am Med Dir Assoc*. 2019;20(10):1190-8.
12. Rozzini R, Sabatini T, Cassinadri A, Boffelli S, Ferri M, Barbisoni P, et al. Relationship between functional loss before hospital admission and mortality in elderly persons with medical illness. *J Gerontol A Biol Sci Med Sci*. 2005;60(9):1180-3.
13. Covinsky KE, Martin GE, Beyth RJ, Justice AC, Sehgal AR, Landefeld CS. The relationship between clinical assessments of nutritional status and adverse outcomes in older hospitalized medical patients. *J Am Geriatr Soc*. 1999;47(5):532-8.
14. Sharma Y, Thompson C, Shari R, Hakendorf P, Miller M. Malnutrition in Acutely Unwell Hospitalized Elderly - "The Skeletons Are Still Rattling in the Hospital Closet". *J Nutr Health Aging*. 2017;21(10):1210-5.
15. Sharma Y, Miller M, Shahi R, Hakendorf P, Horwood C, Thompson C. Malnutrition screening in acutely unwell elderly inpatients. *Br J Nurs*. 2016;25(18):1006-14.
16. Laur CV, McNicholl T, Valaitis R, Keller HH. Malnutrition or frailty? Overlap and evidence gaps in the diagnosis and treatment of frailty and malnutrition. *Applied Physiology, Nutrition & Metabolism*. 2017;42(5):449-58.
17. Rasmussen NM, Belqaid K, Lugnet K, Nielsen AL, Rasmussen HH, Beck AM. Effectiveness of multidisciplinary nutritional support in older hospitalised patients: A systematic review and meta-analyses. *Clinical nutrition ESPEN*. 2018;27:44-52.
18. Wilkinson R, Arensberg ME, Hickson M, Dwyer JT. Frailty Prevention and Treatment: Why Registered Dietitian Nutritionists Need to Take Charge. *J Acad Nutr Diet*. 2017;117(7):1001-9.
19. Higgins JP, Green S. *Cochrane handbook for systematic reviews of interventions: Cochrane book series*. 2008.
20. Moher D, Liberati A, Tetzlaff J, Altman DG. Preferred reporting items for systematic reviews and meta-analyses: the PRISMA statement. *J Clin Epidemiol*. 2009;62(10):1006-12.
21. Innovation VH. *Covidence systematic review software*. Veritas Health Innovation Melbourne, VIC; 2017.
22. Sterne JAC, Savovic J, Page MJ, Elbers RG, Blencowe NS, Boutron I, et al. RoB 2: a revised tool for assessing risk of bias in randomised trials. *BMJ*. 2019;366:l4898.
23. Farrah K, Young K, Tunis MC, Zhao L. Risk of bias tools in systematic reviews of health interventions: an analysis of PROSPERO-registered protocols. *Systematic reviews*. 2019;8(1):280.
24. RevMan. Review manager (revman)[computer program]. version 5.3. The Nordic Cochrane Centre, The Cochrane Collaboration Copenhagen, Denmark; 2014.
25. Higgins JP, Thompson SG, Deeks JJ, Altman DG. Measuring inconsistency in meta-analyses. *BMJ*. 2003;327(7414):557-60.
26. Villareal DT, Chode S, Parimi N, Sinacore DR, Hilton T, Armamento-Villareal R, et al. Weight loss, exercise, or both and physical function in obese older adults. *N Engl J Med*. 2011;364(13):1218-29.
27. Armamento-Villareal R, Aguirre LE, Qualls C, Villareal DT. Effect of lifestyle intervention on the hormonal profile of frail, obese older men. *Journal of Nutrition, Health and Aging*. 2016;20(3):334-40.
28. Cameron ID, Fairhall N, Langron C, Lockwood K, Monaghan N, Aggar C, et al. A multifactorial interdisciplinary intervention reduces frailty in older people: randomized trial. *BMC Med*. 2013;11:65.
29. Fairhall N, Sherrington C, Kurrle SE, Lord SR, Lockwood K, Cameron ID. Effect of a multifactorial interdisciplinary intervention on mobility-related disability in frail older people: randomised controlled trial. *BMC Med*. 2012;10:120.



- 1  
2  
3 551 30. Fairhall N, Sherrington C, Lord SR, Kurrle SE, Langron C, Lockwood K, et al. Effect  
4 552 of a multifactorial, interdisciplinary intervention on risk factors for falls and fall rate in frail  
5 553 older people: a randomised controlled trial. *Age Ageing*. 2014;43(5):616-22.
- 6 554 31. Fairhall N, Sherrington C, Kurrle SE, Lord SR, Lockwood K, Howard K, et al.  
7 555 Economic evaluation of a multifactorial, interdisciplinary intervention versus usual care to  
8 556 reduce frailty in frail older people. *J Am Med Dir Assoc*. 2015;16(1):41-8.
- 9 557 32. Luger E, Dorner TE, Haider S, Kapan A, Lackinger C, Schindler K. Effects of a Home-  
10 558 Based and Volunteer-Administered Physical Training, Nutritional, and Social Support  
11 559 Program on Malnutrition and Frailty in Older Persons: A Randomized Controlled Trial. *J Am*  
12 560 *Med Dir Assoc*. 2016;17(7):671.e9-.e16.
- 13 561 33. Haider S, Dorner TE, Luger E, Kapan A, Titze S, Lackinger C, et al. Impact of a Home-  
14 562 Based Physical and Nutritional Intervention Program Conducted by Lay-Volunteers on  
15 563 Handgrip Strength in Prefrail and Frail Older Adults: A Randomized Control Trial. *PLoS ONE*  
16 564 [Electronic Resource]. 2017;12(1):e0169613.
- 17 565 34. Winzer E, Dorner TE, Grabovac I, Haider S, Kapan A, Lackinger C, et al. Behavior  
18 566 changes by a buddy-style intervention including physical training, and nutritional and social  
19 567 support. *Geriatrics & Gerontology International*. 2019;19(4):323-9.
- 20 568 35. Kapan A, Luger E, Haider S, Titze S, Schindler K, Lackinger C, et al. Fear of falling  
21 569 reduced by a lay led home-based program in frail community-dwelling older adults: A  
22 570 randomised controlled trial. *Arch Gerontol Geriatr*. 2017;68:25-32.
- 23 571 36. Kapan A, Winzer E, Haider S, Titze S, Schindler K, Lackinger C, et al. Impact of a lay-  
24 572 led home-based intervention programme on quality of life in community-dwelling pre-frail and  
25 573 frail older adults: a randomized controlled trial. *BMC Geriatr*. 2017;17:1-11.
- 26 574 37. Arrieta H, Astrugue C, Regueme S, Durrieu J, Maillard A, Rieger A, et al. Effects of a  
27 575 physical activity programme to prevent physical performance decline in onco-geriatric  
28 576 patients: a randomized multicentre trial. *Journal of Cachexia, Sarcopenia and Muscle*.  
29 577 2019;10(2):287-97.
- 30 578 38. Niccoli S, Kolobov A, Bon T, Rafilovich S, Munro H, Tanner K, et al. Whey Protein  
31 579 Supplementation Improves Rehabilitation Outcomes in Hospitalized Geriatric Patients: A  
32 580 Double Blinded, Randomized Controlled Trial. *J Nutr Gerontol Geriatr*. 2017;36(4):149-65.
- 33 581 39. Milte R, Miller MD, Crotty M, Mackintosh S, Thomas S, Cameron ID, et al. COST-  
34 582 EFFECTIVENESS OF INDIVIDUALIZED NUTRITION AND EXERCISE THERAPY FOR  
35 583 REHABILITATION FOLLOWING HIP FRACTURE. *Journal of Rehabilitation Medicine*  
36 584 (Stiftelsen Rehabiliteringsinformation). 2016;48(4):378-85.
- 37 585 40. Singh NA, Quine S, Clemson LM, Williams EJ, Williamson DA, Stavrinou TM, et al.  
38 586 Effects of high-intensity progressive resistance training and targeted multidisciplinary  
39 587 treatment of frailty on mortality and nursing home admissions after hip fracture: a randomized  
40 588 controlled trial. *J Am Med Dir Assoc*. 2012;13(1):24-30.
- 41 589 41. Blanc-Bisson C, Dechamps A, Gouspillou G, Dehail P, Bourdel-Marchasson I. A  
42 590 randomized controlled trial on early physiotherapy intervention versus usual care in acute car  
43 591 unit for elderly: Potential benefits in light of dietary intakes. *Journal of Nutrition, Health and*  
44 592 *Aging*. 2008;12(6):395-9.
- 45 593 42. Miller MD, Crotty M, Whitehead C, Bannerman E, Daniels LA. Nutritional  
46 594 supplementation and resistance training in nutritionally at risk older adults following lower  
47 595 limb fracture: a randomized controlled trial. *Clin Rehabil*. 2006;20(4):311-23.
- 48 596 43. Rodriguez-Manas L, Laosa O, Vellas B, Paolisso G, Topinkova E, Oliva-Moreno J, et  
49 597 al. Effectiveness of a multimodal intervention in functionally impaired older people with type  
50 598 2 diabetes mellitus. *J Cachexia Sarcopenia Muscle*. 2019;10(4):721-33.
- 51 599 44. Azad N, Molnar F, Byszewski A. Lessons learned from a multidisciplinary heart failure  
52 600 clinic for older women: a randomised controlled trial. *Age Ageing*. 2008;37(3):282-7.



- 1  
2  
3 601 45. Romero-Ortuno R, Walsh CD, Lawlor BA, Kenny RA. A frailty instrument for primary  
4 602 care: findings from the Survey of Health, Ageing and Retirement in Europe (SHARE). *BMC*  
5 603 *Geriatr.* 2010;10(1):57.
- 6 604 46. Haider S, Dorner TE, Luger E, Kapan A, Titze S, Lackinger C, et al. Impact of a home-  
7 605 based physical and nutritional intervention program conducted by lay-volunteers on handgrip  
8 606 strength in prefrail and frail older adults: A randomized control trial. *PLoS ONE.* 2017;12(1).
- 9 607 47. Wright J, Baldwin C. Oral nutritional support with or without exercise in the  
10 608 management of malnutrition in nutritionally vulnerable older people: A systematic review and  
11 609 meta-analysis. *Clin Nutr.* 2018;37(6 Pt A):1879-91.
- 12 610 48. Haider S, Grabovac I, Winzer E, Kapan A, Schindler KE, Lackinger C, et al. Change  
13 611 in inflammatory parameters in prefrail and frail persons obtaining physical training and  
14 612 nutritional support provided by lay volunteers: A randomized controlled trial. *PLoS One.*  
15 613 2017;12(10).
- 16 614 49. Apóstolo J, Cooke R, Bobrowicz-Campos E, Santana S, Marcucci M, Cano A, et al.  
17 615 Effectiveness of interventions to prevent pre-frailty and frailty progression in older adults: a  
18 616 systematic review. *JB I database of systematic reviews and implementation reports.*  
19 617 2018;16(1):140.
- 20 618 50. De Vries N, Staal J, Van Ravensberg C, Hobbelen J, Rikkert MO, Nijhuis-Van der  
21 619 Sanden M. Outcome instruments to measure frailty: a systematic review. *Ageing research*  
22 620 *reviews.* 2011;10(1):104-14.
- 23 621 51. Dedeysne L, Deschodt M, Verschueren S, Tournoy J, Gielen E. Effects of multi-domain  
24 622 interventions in (pre)frail elderly on frailty, functional, and cognitive status: a systematic  
25 623 review. *Clin Interv Aging.* 2017;12:873-96.
- 26 624 52. Tarazona-Santabalbina FJ, Gomez-Cabrera MC, Perez-Ros P, Martinez-Arnau FM,  
27 625 Cabo H, Tsaparas K, et al. A Multicomponent Exercise Intervention that Reverses Frailty and  
28 626 Improves Cognition, Emotion, and Social Networking in the Community-Dwelling Frail  
29 627 Elderly: A Randomized Clinical Trial. *J Am Med Dir Assoc.* 2016;17(5):426-33.
- 30 628 53. Kim CO, Lee KR. Preventive effect of protein-energy supplementation on the  
31 629 functional decline of frail older adults with low socioeconomic status: a community-based  
32 630 randomized controlled study. *Journals of Gerontology Series A: Biological Sciences &*  
33 631 *Medical Sciences.* 2013;68(3):309-16.
- 34 632 54. Denison HJ, Cooper C, Sayer AA, Robinson SM. Prevention and optimal management  
35 633 of sarcopenia: a review of combined exercise and nutrition interventions to improve muscle  
36 634 outcomes in older people. *Clin Interv Aging.* 2015;10:859.
- 37 635 55. Munk T, Tolstrup U, Beck AM, Holst M, Rasmussen HH, Hovhannisyan K, et al.  
38 636 Individualised dietary counselling for nutritionally at-risk older patients following discharge  
39 637 from acute hospital to home: a systematic review and meta-analysis. *J Hum Nutr Diet.*  
40 638 2016;29(2):196-208.
- 41 639 56. Beck AM, Kjær S, Hansen BS, Storm RL, Thal-Jantzen K, Bitz C. Follow-up home  
42 640 visits with registered dietitians have a positive effect on the functional and nutritional status of  
43 641 geriatric medical patients after discharge: a randomized controlled trial. *Clin Rehabil.*  
44 642 2013;27(6):483-93.
- 45 643 57. Fairhall N, Sherrington C, Cameron ID, Kurrle SE, Lord SR, Lockwood K, et al. A  
46 644 multifactorial intervention for frail older people is more than twice as effective among those  
47 645 who are compliant: complier average causal effect analysis of a randomised trial. *J Physiother.*  
48 646 2017;63(1):40-4.
- 49 647 58. Brisswalter J, Collardeau M, René A. Effects of acute physical exercise characteristics  
50 648 on cognitive performance. *Sports Med.* 2002;32(9):555-66.
- 51 649 59. Klímová B, Vališ M. Nutritional interventions as beneficial strategies to delay cognitive  
52 650 decline in healthy older individuals. *nutrients.* 2018;10(7):905.

- 1  
2  
3 651 60. Schättin A, Baur K, Stutz J, Wolf P, de Bruin ED. Effects of physical exercise combined  
4 652 with nutritional supplements on aging brain related structures and functions: a systematic  
5 653 review. *Front Aging Neurosci.* 2016;8:161.
- 6 654 61. Hardman RJ, Kennedy G, Macpherson H, Scholey AB, Pipingas A. A randomised  
7 655 controlled trial investigating the effects of Mediterranean diet and aerobic exercise on cognition  
8 656 in cognitively healthy older people living independently within aged care facilities: the  
9 657 Lifestyle Intervention in Independent Living Aged Care (LIILAC) study protocol  
10 658 [ACTRN12614001133628]. *Nutr J.* 2015;14(1):53.
- 11 659 62. Drummond MF, Stoddart GL. Economic analysis and clinical trials. *Control Clin*  
12 660 *Trials.* 1984;5(2):115-28.
- 13 661 63. Ruiques FG, Adang EM, Assendelft WJ, Schers HJ, Koopmans RT, Zuidema SU. Cost-  
14 662 effectiveness of a multicomponent primary care program targeting frail elderly people. *BMC*  
15 663 *Fam Pract.* 2018;19(1):62.
- 16 664 64. Umberson D, Karas Montez J. Social relationships and health: A flashpoint for health  
17 665 policy. *J Health Soc Behav.* 2010;51(1\_suppl):S54-S66.
- 18 666 65. Hoffmann TC, Glasziou PP, Boutron I, Milne R, Perera R, Moher D, et al. Better  
19 667 reporting of interventions: template for intervention description and replication (TIDieR)  
20 668 checklist and guide. *BMJ.* 2014;348:g1687.
- 21 669 66. Battersby M, Harris M, Smith D, Reed R, Woodman R. A pragmatic randomized  
22 670 controlled trial of the Flinders Program of chronic condition management in community health  
23 671 care services. *Patient Educ Couns.* 2015;98(11):1367-75.
- 24 672 67. Fairhall N, Kurrle SE, Sherrington C, Lord SR, Lockwood K, John B, et al.  
25 673 Effectiveness of a multifactorial intervention on preventing development of frailty in pre-frail  
26 674 older people: Study protocol for a randomised controlled trial. *BMJ Open.* 2015;5(2).
- 27 675 68. Gonzalez-Sanchez M, Cuesta-Vargas AI, Del Mar Rodriguez Gonzalez M, Caro ED,  
28 676 Nunez GO, Galan-Mercant A, et al. Effectiveness of a muticomponent workout program  
29 677 integrated in an evidence based multimodal program in hyperfrail elderly patients:  
30 678 POWERAGING randomized clinical trial protocol. *BMC Geriatr.* 2019;19(1).
- 31 679 69. Jadczyk AD, Luscombe-Marsh N, Taylor P, Barnard R, Makwana N, Visvanathan R.  
32 680 The EXPRESS Study: Exercise and Protein Effectiveness Supplementation Study supporting  
33 681 autonomy in community dwelling frail older people-study protocol for a randomized controlled  
34 682 pilot and feasibility study. *Pilot & Feasibility Studies.* 2018;4:8.
- 35 683 70. Landi F, Cesari M, Calvani R, Cherubini A, Di Bari M, Bejuit R, et al. The 'Sarcopenia  
36 684 and Physical fRailty IN older people: multi-componenT Treatment strategies' (SPRINTT)  
37 685 randomized controlled trial: design and methods. *Aging Clin Exp Res.* 2017;29(1):89-100.

686

687

688

689

690

691

1  
2  
3 692 **Figure captions**  
4

5  
6 693 Fig.1 Flow diagram illustrating results of the search and study selection process as described  
7  
8 694 in the PRISMA statement  
9

10  
11 695 Fig 2. Meta-analysis of reduction in frailty score for exercise and nutrition intervention vs  
12  
13 696 standard care  
14

15  
16 697 Fig.3 Meta-analyses of Short physical performance battery, Gait speed, Balance test, Chair  
17  
18 698 stand test, Activities of daily living, handgrip strength  
19  
20  
21  
22  
23  
24  
25  
26  
27  
28  
29  
30  
31  
32  
33  
34  
35  
36  
37  
38  
39  
40  
41  
42  
43  
44  
45  
46  
47  
48  
49  
50  
51  
52  
53  
54  
55  
56  
57  
58  
59  
60

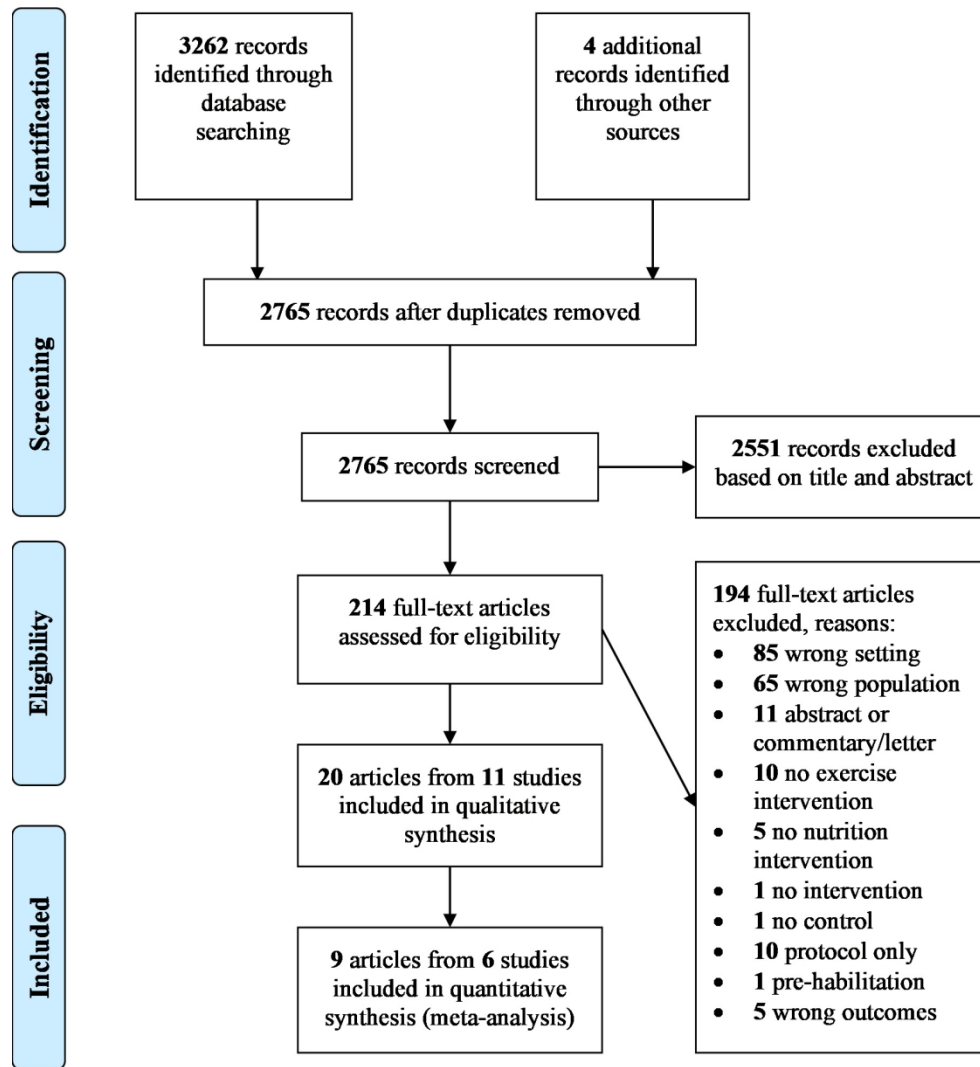

Fig.1 Flow diagram illustrating results of the search and study selection process as described in the PRISMA statement

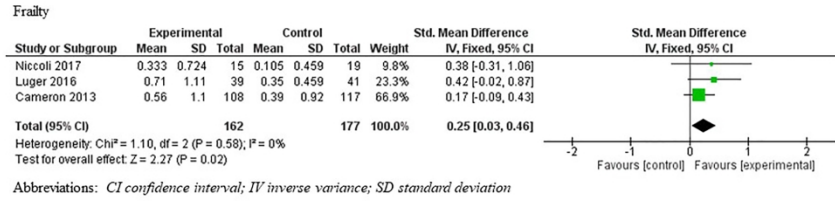

Fig 2. Meta-analysis of reduction in frailty score for exercise and nutrition intervention vs standard care

268x338mm (300 x 300 DPI)

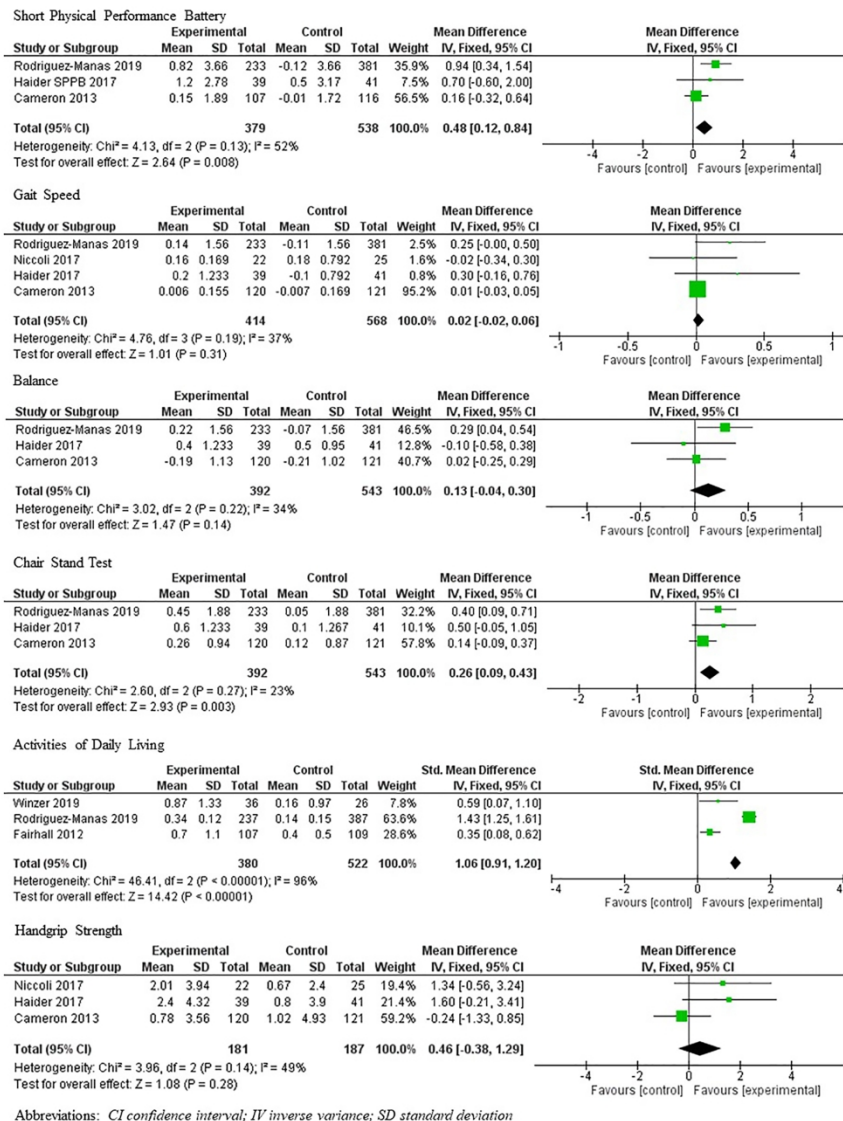

Fig.3 Meta-analyses of Short physical performance battery, Gait speed, Balance test, Chair stand test, Activities of daily living, handgrip strength

268x338mm (300 x 300 DPI)

## Search Strategy – Medline

| #  | Searches                                                                                                                                                                                                                                                     |
|----|--------------------------------------------------------------------------------------------------------------------------------------------------------------------------------------------------------------------------------------------------------------|
| 1  | "diet, food, AND nutrition"/ or food/ or diet/                                                                                                                                                                                                               |
| 2  | dietary proteins/ or dietary supplements/                                                                                                                                                                                                                    |
| 3  | Nutritional Status/ or Feeding Behavior/                                                                                                                                                                                                                     |
| 4  | Dietitian/                                                                                                                                                                                                                                                   |
| 5  | Nutrition Assessment/ or Nutrition Therapy/                                                                                                                                                                                                                  |
| 6  | ((diet* or nutrition* or food*) adj5 (intervention or program or supplement or educat* or assess* or advic* or counsel* or treat*)).tw,kf.                                                                                                                   |
| 7  | or/1-6                                                                                                                                                                                                                                                       |
| 8  | motor activity/ or exercise/ or muscle strength/ or physical endurance/ or physical fitness.mp.                                                                                                                                                              |
| 9  | Exercise/ or resistance training/                                                                                                                                                                                                                            |
| 10 | (exercis* or "resistance training" or "exercis* therapy" or "muscle stretching exercis*" or "physical exercis*" or "strength train*" or "aerobic exercis*" or hydrotherapy or rehabilitat* or walk* or cycl* or conditioning* or "leg press" or flexib*).mp. |
| 11 | Physiotherapy/                                                                                                                                                                                                                                               |
| 12 | ((exercise* or resistanc* or strength) adj5 (intervention or program or educat* or advice* or treat* or train* or rehabilit*)).tw,kf.                                                                                                                        |
| 13 | or/8-12                                                                                                                                                                                                                                                      |
| 14 | frail elderly/ or pre-frail elderly/                                                                                                                                                                                                                         |
| 15 | frail*.mp.                                                                                                                                                                                                                                                   |
| 16 | (functional* adj2 (declin* or impair*) adj3 (aged or aging or elderly or elder* or old* or senior*)).mp.                                                                                                                                                     |
| 17 | (frail* and (geriatric* or gerontolog* or (vulnerable and older))).mp.                                                                                                                                                                                       |
| 18 | (frail* and (aged or aging or elderly or elder* or older or senior*)).mp.                                                                                                                                                                                    |
| 19 | (frail* and (geriatric* or gerontolog* or aging)).mp.                                                                                                                                                                                                        |
| 20 | ("geriatric assess*" or "functionally-impaired elder*").mp.                                                                                                                                                                                                  |
| 21 | 14 or 15 or 16 or 17 or 18 or 19 or 20                                                                                                                                                                                                                       |
| 22 | 7 and 13 and 21                                                                                                                                                                                                                                              |

Translated above strategy for other databases: **CINAHL, Emcare, Scopus, Cochrane, Ageline and PEDro**



Activities of Daily Living – Random Effects Model

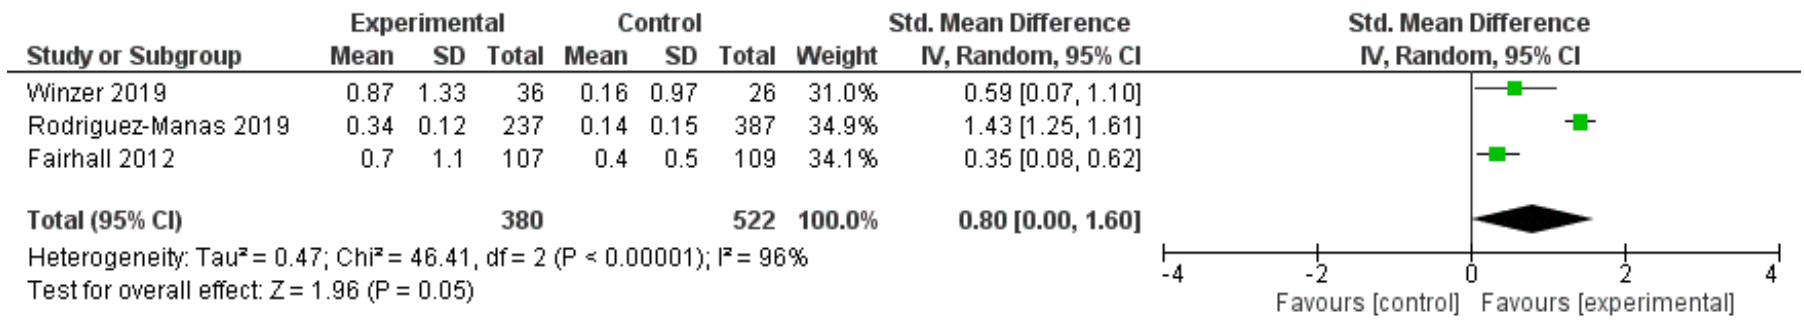

Abbreviations: *CI* confidence interval; *IV* inverse variance; *SD* standard deviation

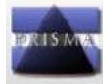

# PRISMA 2009 Checklist

1  
2  
3  
4  
5  
6  
7  
8  
9  
10  
11  
12  
13  
14  
15  
16  
17  
18  
19  
20  
21  
22  
23  
24  
25  
26  
27  
28  
29  
30  
31  
32  
33  
34  
35  
36  
37  
38  
39  
40  
41  
42  
43  
44  
45  
46  
47

| Section/topic                      | #  | Checklist item                                                                                                                                                                                                                                                                                              | Reported on page # |
|------------------------------------|----|-------------------------------------------------------------------------------------------------------------------------------------------------------------------------------------------------------------------------------------------------------------------------------------------------------------|--------------------|
| <b>TITLE</b>                       |    |                                                                                                                                                                                                                                                                                                             |                    |
| Title                              | 1  | Identify the report as a systematic review, meta-analysis, or both.                                                                                                                                                                                                                                         | 1                  |
| <b>ABSTRACT</b>                    |    |                                                                                                                                                                                                                                                                                                             |                    |
| Structured summary                 | 2  | Provide a structured summary including, as applicable: background; objectives; data sources; study eligibility criteria, participants, and interventions; study appraisal and synthesis methods; results; limitations; conclusions and implications of key findings; systematic review registration number. | 2                  |
| <b>INTRODUCTION</b>                |    |                                                                                                                                                                                                                                                                                                             |                    |
| Rationale                          | 3  | Describe the rationale for the review in the context of what is already known.                                                                                                                                                                                                                              | 2-5                |
| Objectives                         | 4  | Provide an explicit statement of questions being addressed with reference to participants, interventions, comparisons, outcomes, and study design (PICOS).                                                                                                                                                  | 5                  |
| <b>METHODS</b>                     |    |                                                                                                                                                                                                                                                                                                             |                    |
| Protocol and registration          | 5  | Indicate if a review protocol exists, if and where it can be accessed (e.g., Web address), and, if available, provide registration information including registration number.                                                                                                                               | 5-6                |
| Eligibility criteria               | 6  | Specify study characteristics (e.g., PICOS, length of follow-up) and report characteristics (e.g., years considered, language, publication status) used as criteria for eligibility, giving rationale.                                                                                                      | 6                  |
| Information sources                | 7  | Describe all information sources (e.g., databases with dates of coverage, contact with study authors to identify additional studies) in the search and date last searched.                                                                                                                                  | 6                  |
| Search                             | 8  | Present full electronic search strategy for at least one database, including any limits used, such that it could be repeated.                                                                                                                                                                               | 6                  |
| Study selection                    | 9  | State the process for selecting studies (i.e., screening, eligibility, included in systematic review, and, if applicable, included in the meta-analysis).                                                                                                                                                   | 6                  |
| Data collection process            | 10 | Describe method of data extraction from reports (e.g., piloted forms, independently, in duplicate) and any processes for obtaining and confirming data from investigators.                                                                                                                                  | 6                  |
| Data items                         | 11 | List and define all variables for which data were sought (e.g., PICOS, funding sources) and any assumptions and simplifications made.                                                                                                                                                                       | 6                  |
| Risk of bias in individual studies | 12 | Describe methods used for assessing risk of bias of individual studies (including specification of whether this was done at the study or outcome level), and how this information is to be used in any data synthesis.                                                                                      | 7                  |
| Summary measures                   | 13 | State the principal summary measures (e.g., risk ratio, difference in means).                                                                                                                                                                                                                               | 7                  |
| Synthesis of results               | 14 | Describe the methods of handling data and combining results of studies, if done, including measures of consistency (e.g., $I^2$ ) for each meta-analysis.                                                                                                                                                   | 6-7                |

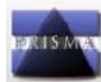

# PRISMA 2009 Checklist

Page 1 of 2

| Section/topic                 | #  | Checklist item                                                                                                                                                                                           | Reported on page # |
|-------------------------------|----|----------------------------------------------------------------------------------------------------------------------------------------------------------------------------------------------------------|--------------------|
| Risk of bias across studies   | 15 | Specify any assessment of risk of bias that may affect the cumulative evidence (e.g., publication bias, selective reporting within studies).                                                             | 7                  |
| Additional analyses           | 16 | Describe methods of additional analyses (e.g., sensitivity or subgroup analyses, meta-regression), if done, indicating which were pre-specified.                                                         | nil                |
| <b>RESULTS</b>                |    |                                                                                                                                                                                                          |                    |
| Study selection               | 17 | Give numbers of studies screened, assessed for eligibility, and included in the review, with reasons for exclusions at each stage, ideally with a flow diagram.                                          | 7-8, fig 1         |
| Study characteristics         | 18 | For each study, present characteristics for which data were extracted (e.g., study size, PICOS, follow-up period) and provide the citations.                                                             | 7-10               |
| Risk of bias within studies   | 19 | Present data on risk of bias of each study and, if available, any outcome level assessment (see item 12).                                                                                                | 10-11              |
| Results of individual studies | 20 | For all outcomes considered (benefits or harms), present, for each study: (a) simple summary data for each intervention group (b) effect estimates and confidence intervals, ideally with a forest plot. | 12-18              |
| Synthesis of results          | 21 | Present results of each meta-analysis done, including confidence intervals and measures of consistency.                                                                                                  | 12-18, fig. 2 & 3  |
| Risk of bias across studies   | 22 | Present results of any assessment of risk of bias across studies (see Item 15).                                                                                                                          | 8, Fig 2           |
| Additional analysis           | 23 | Give results of additional analyses, if done (e.g., sensitivity or subgroup analyses, meta-regression [see Item 16]).                                                                                    | nil                |
| <b>DISCUSSION</b>             |    |                                                                                                                                                                                                          |                    |
| Summary of evidence           | 24 | Summarize the main findings including the strength of evidence for each main outcome; consider their relevance to key groups (e.g., healthcare providers, users, and policy makers).                     | 18-21              |
| Limitations                   | 25 | Discuss limitations at study and outcome level (e.g., risk of bias), and at review-level (e.g., incomplete retrieval of identified research, reporting bias).                                            | 21-22              |
| Conclusions                   | 26 | Provide a general interpretation of the results in the context of other evidence, and implications for future research.                                                                                  | 22-23              |
| <b>FUNDING</b>                |    |                                                                                                                                                                                                          |                    |
| Funding                       | 27 | Describe sources of funding for the systematic review and other support (e.g., supply of data); role of funders for the systematic review.                                                               | 24                 |

From: Moher D, Liberati A, Tetzlaff J, Altman DG, The PRISMA Group (2009). Preferred Reporting Items for Systematic Reviews and Meta-Analyses: The PRISMA Statement. PLoS Med 6(7): e1000097. doi:10.1371/journal.pmed1000097

For more information, visit: [www.prisma-statement.org](http://www.prisma-statement.org).

For peer review only - <http://bmjopen.bmj.com/site/about/guidelines.xhtml>

# BMJ Open

## Effectiveness of combined exercise and nutrition interventions in pre-frail or frail older hospitalised patients: a systematic review and meta-analysis

|                                 |                                                                                                                                                                                                                                                                                                                                                                                                                                                                                    |
|---------------------------------|------------------------------------------------------------------------------------------------------------------------------------------------------------------------------------------------------------------------------------------------------------------------------------------------------------------------------------------------------------------------------------------------------------------------------------------------------------------------------------|
| Journal:                        | <i>BMJ Open</i>                                                                                                                                                                                                                                                                                                                                                                                                                                                                    |
| Manuscript ID                   | bmjopen-2020-040146.R2                                                                                                                                                                                                                                                                                                                                                                                                                                                             |
| Article Type:                   | Original research                                                                                                                                                                                                                                                                                                                                                                                                                                                                  |
| Date Submitted by the Author:   | 04-Nov-2020                                                                                                                                                                                                                                                                                                                                                                                                                                                                        |
| Complete List of Authors:       | Han, chad Yixian; Flinders University College of Nursing and Health Sciences,<br>Miller, Michelle; Flinders University Faculty of Medicine Nursing and Health Sciences, Nutrition & Dietetics<br>Yaxley, Alison; Flinders University College of Nursing and Health Sciences<br>Baldwin, Claire; Flinders University College of Nursing and Health Sciences<br>Woodman, Richard; Flinders University, General Practice<br>Sharma, Yogesh; Flinders Medical Centre, General Medicine |
| <b>Primary Subject Heading</b>: | Geriatric medicine                                                                                                                                                                                                                                                                                                                                                                                                                                                                 |
| Secondary Subject Heading:      | Rehabilitation medicine                                                                                                                                                                                                                                                                                                                                                                                                                                                            |
| Keywords:                       | GERIATRIC MEDICINE, REHABILITATION MEDICINE, NUTRITION & DIETETICS, GENERAL MEDICINE (see Internal Medicine)                                                                                                                                                                                                                                                                                                                                                                       |
|                                 |                                                                                                                                                                                                                                                                                                                                                                                                                                                                                    |

SCHOLARONE™  
Manuscripts



I, the Submitting Author has the right to grant and does grant on behalf of all authors of the Work (as defined in the below author licence), an exclusive licence and/or a non-exclusive licence for contributions from authors who are: i) UK Crown employees; ii) where BMJ has agreed a CC-BY licence shall apply, and/or iii) in accordance with the terms applicable for US Federal Government officers or employees acting as part of their official duties; on a worldwide, perpetual, irrevocable, royalty-free basis to BMJ Publishing Group Ltd ("BMJ") its licensees and where the relevant Journal is co-owned by BMJ to the co-owners of the Journal, to publish the Work in this journal and any other BMJ products and to exploit all rights, as set out in our [licence](#).

The Submitting Author accepts and understands that any supply made under these terms is made by BMJ to the Submitting Author unless you are acting as an employee on behalf of your employer or a postgraduate student of an affiliated institution which is paying any applicable article publishing charge ("APC") for Open Access articles. Where the Submitting Author wishes to make the Work available on an Open Access basis (and intends to pay the relevant APC), the terms of reuse of such Open Access shall be governed by a Creative Commons licence – details of these licences and which [Creative Commons](#) licence will apply to this Work are set out in our licence referred to above.

Other than as permitted in any relevant BMJ Author's Self Archiving Policies, I confirm this Work has not been accepted for publication elsewhere, is not being considered for publication elsewhere and does not duplicate material already published. I confirm all authors consent to publication of this Work and authorise the granting of this licence.

1  
2  
3 **Title Page**  
4

5  
6 2 Effectiveness of combined exercise and nutrition interventions in pre-frail or frail older  
7  
8 3 hospitalised patients: a systematic review and meta-analysis  
9

10  
11 **Authors:**  
12

13  
14 5 Chad Yixian Han<sup>1,2</sup> [chad.han@flinders.edu.au](mailto:chad.han@flinders.edu.au)  
15

16  
17 6 Michelle Miller<sup>1</sup>, [michelle.miller@flinders.edu.au](mailto:michelle.miller@flinders.edu.au)  
18

19  
20 7 Alison Yaxley<sup>1</sup>, [alison.yaxley@flinders.edu.au](mailto:alison.yaxley@flinders.edu.au)  
21

22  
23 8 Claire Baldwin<sup>1</sup>, [claire.baldwin@flinders.edu.au](mailto:claire.baldwin@flinders.edu.au)  
24

25  
26 9 Richard Woodman<sup>2</sup>, [richard.woodman@flinders.edu.au](mailto:richard.woodman@flinders.edu.au)  
27

28  
29 10 Yogesh Sharma<sup>3,4</sup> [yogesh.sharma@sa.gov.au](mailto:yogesh.sharma@sa.gov.au)  
30

31  
32 <sup>1</sup>Caring Futures Institute, College of Nursing and Health Sciences, Flinders University,  
33  
34 Australia; <sup>2</sup>Flinders Centre for Epidemiology and Biostatistics, Flinders University, Australia;  
35  
36 <sup>3</sup>College of Medicine and Public Health, Flinders University, Australia; <sup>4</sup>Department of  
37  
38 General Medicine, Flinders Medical Centre, Australia  
39  
40

41  
42 **Corresponding Author:** Chad Yixian Han, Caring Futures Institute, College of Nursing and  
43  
44 Health Sciences, Flinders University, Sturt Road, Bedford Park, SA5042, E-mail address:  
45  
46 [chad.han@flinders.edu.au](mailto:chad.han@flinders.edu.au), Tel.: +61 452091109  
47  
48

49  
50 **Keywords:** frail; pre-frail; older people; exercise; nutrition  
51

52  
53 **Word count:** 4677 (excluding abstract, references, tables, figures)  
54

55  
56 **PROSPERO registration:** CRD42020153934  
57

58  
59  
60

## 22 **Abstract**

23 Objectives: To determine the effectiveness of combined exercise-nutrition interventions in pre-  
24 frail/frail hospitalised older adults on frailty, frailty-related indicators, quality of life (QoL),  
25 falls and its cost-effectiveness.

26 Design: Randomised controlled trials (RCTs) of combined exercise-nutrition interventions on  
27 hospitalised pre-frail/frail older adults  $\geq 65$  years were collated from MEDLINE, Emcare,  
28 CINAHL, Ageline, Scopus, Cochrane and PEDro on 10<sup>th</sup> October 2019. The methodological  
29 quality was appraised, and data were summarised descriptively or by meta-analysis using a  
30 fixed effects model. The standardised mean difference (SMD) or difference of means (MD)  
31 with 95% confidence intervals (CIs) was calculated.

32 Results: Twenty articles from 11 RCTs experimenting exercise-nutrition interventions on  
33 hospitalised older adults were included. Eight articles were suitable for the meta-analyses. One  
34 study had low risk of bias and found improvements in physical performance and frailty-related  
35 biomarkers. Exercise interventions were mostly supervised by a physiotherapist, focusing on  
36 strength, ranging 2-5 times/week, of 20-90 minutes duration. Most nutrition interventions  
37 involved counselling and supplementation but had dietitian supervision in only three studies.  
38 The meta-analyses suggest that participants who received exercise-nutrition intervention had  
39 greater reduction in frailty scores (n=3, SMD 0.25; 95% CI 0.03-0.46; P=0.02) and  
40 improvement in short physical performance battery (SPPB) scores (n=3, MD 0.48; 95% CI  
41 0.12-0.84; P=0.008) compared to standard care. Only the chair-stand test (n=3) out of the three  
42 SPPB components was significantly improved (MD 0.26; 95% CI 0.09-0.43; P=0.003).  
43 Patients were more independent in activities of daily living in intervention groups, but high  
44 heterogeneity was observed ( $I^2=96\%$ ,  $P<0.001$ ). The pooled effect for handgrip (n=3) +/- knee  
45 extension muscle strength (n=4) was not statistically significant. Nutritional status, cognition,



1  
2  
3 46 biomarkers, QoL, falls and cost-effectiveness were summarised descriptively due to  
4  
5 47 insufficient data.  
6  
7

8 48 Conclusions: There is evidence, albeit weak, showing that exercise-nutrition interventions are  
9  
10 49 effective to improve frailty and frailty-related indicators in hospitalised older adults.  
11  
12

13  
14 50 **PROSPERO registration number:** CRD42020153934  
15

### 16 17 51 **Strengths and limitations of study**

- 18  
19 52 • This is the first comprehensive systematic review with meta-analysis on the  
20  
21 53 effectiveness of exercise-nutrition interventions on frailty and outcomes related to  
22  
23 54 frailty in hospitalised and pre-frail/frail older adults.  
24  
25  
26 55 • Only randomised controlled trials describing existing exercise-nutrition interventions  
27  
28 56 in pre-frail/frail older hospitalised patients were included.  
29  
30  
31 57 • There was a moderate risk of bias for most included studies such that the findings of  
32  
33 58 this review are inconclusive, making it difficult to draw firm conclusions.  
34  
35

### 36 37 59 **Introduction**

38  
39 60 Frailty is a major contributor to late-life disability as it leads to loss of independence.<sup>1</sup> It is also  
40  
41 61 associated with poor health outcomes, and, increased health-care costs and service use.<sup>1</sup> Frailty  
42  
43 62 has been defined for clinical research by Fried et al<sup>2</sup> as a combination of unintentional weight  
44  
45 63 loss, weakness, exhaustion, slowness and reduced physical activity. Pre-frailty is a stage before  
46  
47 64 frailty, where one or two of the five aforementioned symptoms are present.<sup>2</sup> There are no gold  
48  
49 65 standard in the clinical care setting to define frailty or pre-frailty but is commonly understood  
50  
51 66 as age-related physiological decline, resulting in increased vulnerability to health crises.<sup>3</sup> Older  
52  
53 67 adults (aged >65 years) that have been classified as frail and are hospitalised, have a three-fold  
54  
55 68 higher risk of readmission or death, as compared to the younger population.<sup>4</sup> The management  
56  
57  
58  
59  
60

1  
2  
3 69 of older adults who are frail has an incremental effect on health expenditures with an additional  
4  
5 70 equivalent of AU\$2400 per frail patient per year.<sup>5</sup> With 21% of the population over 65 years  
6  
7 71 estimated to be frail and 48% estimated to be pre-frail, concerns of economic impact are  
8  
9  
10 72 compounded by an ageing population.<sup>6</sup>

11  
12  
13 73 Exercise and nutrition are inextricably linked, in particular strength training can address  
14  
15 74 component issues of the frail phenotype.<sup>7</sup> Yet evidence supporting the effectiveness of  
16  
17 75 exercise-nutrition interventions for reversal of frailty is limited to community-dwelling older  
18  
19 76 adults.<sup>8</sup> In a study of community participants, a 3-month combined exercise-nutrition  
20  
21 77 intervention resulted in a significant reversal of frailty (reduction in Fried frailty score) at 6-  
22  
23 78 months, compared to the control group (between-group difference  $-0.34$ ; 95% confidence  
24  
25 79 interval [CI]  $-0.52$  to  $-0.16$ ;  $P < 0.001$ ).<sup>9</sup> The combination of exercise therapy and dietary  
26  
27 80 intervention in older adults who are frail, has also been reported to increase muscle strength  
28  
29 81 (knee extension between-group difference 1.84 kg, 95% CI 0.17–3.51,  $P = 0.03$ )<sup>10</sup> and improve  
30  
31 82 nutritional status (Mini Nutritional Assessment (MNA) Short Form between group difference  
32  
33 83 1.4, 95% CI 0.9-1.9,  $P < 0.01$ ).<sup>11</sup>

34  
35  
36  
37  
38  
39 84 A recent meta-analysis suggested that although effective, exercise combined with nutrition was  
40  
41 85 not more effective in treating frailty than exercise alone.<sup>12</sup> However, the majority of included  
42  
43 86 studies were conducted in a community setting, with only 15% of older adults either  
44  
45 87 hospitalised or recruited from acute care settings. No study has systematically evaluated  
46  
47 88 evidence for interventions that commence during acute hospitalisation or early post discharge  
48  
49 89 (in the high-risk period for post-hospital syndrome).

50  
51  
52  
53 90 Hospitalisation is a vulnerable period, especially for older adults who are frail and therefore at  
54  
55 91 higher risk of functional loss,<sup>13</sup> malnutrition<sup>14, 15</sup> and further decline in frailty status.  
56  
57 92 Malnutrition is ubiquitous in older hospitalised patients with a prevalence as high as 50%.<sup>16</sup>  
58  
59  
60

1  
2  
3 93 Since many domains of frailty are attributed to poor nutrition,<sup>17</sup> the effect of nutrition  
4  
5 94 intervention when combined with exercise, may be more significant in the hospitalised  
6  
7  
8 95 population.<sup>17</sup> Also, a recent review suggests that nutrition support, provided by a  
9  
10 96 multidisciplinary team, may have a positive impact on mortality and quality of life in  
11  
12 97 hospitalised older adult patients.<sup>18</sup> Nutritional therapy extends beyond protein or nutrition  
13  
14 98 supplementation as reported in previous studies and may be more effective as part of  
15  
16 99 individualised medical nutrition therapies involving dietitians to improve diet adequacy.<sup>19</sup>  
17  
18  
19  
20 100 This study aims to determine the effectiveness of combined exercise-nutrition interventions on  
21  
22 101 (1) frailty, (2) frailty-related indicators, falls, quality of life (QoL) and (3) its cost effectiveness  
23  
24 102 on pre-frail or frail hospitalised older adults.  
25  
26  
27  
28 103  
29

## 30 104 **Materials and Methods**

### 31 32 33 105 *Protocol and registration*

34  
35  
36 106 The protocol for this review was compliant with Cochrane systematic review guidelines,<sup>20</sup> and  
37  
38 107 registered with the International Prospective Register of Systematic Reviews (PROSPERO),  
39  
40 108 CRD42020153934. The study is reported according to Preferred Reporting Items for  
41  
42 109 Systematic Reviews and Meta-Analyses (PRISMA) guidelines.<sup>21</sup> Patients and/or members of  
43  
44 110 the public were not involved in this study.  
45  
46  
47

### 48 111 *Search methods*

49  
50  
51 112 Systematic searches of electronic databases (MEDLINE, Emcare, CINAHL, Ageline, Scopus,  
52  
53 113 Cochrane and PEDro) were conducted by the lead author (CH) from inception until 10th  
54  
55 114 October 2019 using search strategies reviewed by an academic librarian (search queries  
56  
57 115 available in Supplementary file 1). Additionally, related citations to eligible items were  
58  
59  
60

1  
2  
3 116 identified using the suggested related citation function in Pubmed. Reference lists of eligible  
4  
5 117 items were also screened.  
6  
7

8 118 *Inclusion and exclusion criteria*  
9

10  
11 119 The inclusion criteria were: 1) randomised controlled trials; 2) inclusion of pre-frail or frail  
12  
13 120 participants (as defined by study authors); 3) recruitment of older adult inpatients and/or those  
14  
15 121 hospitalised within the past 30 days of recruitment; 4) interventions that started while patients  
16  
17 122 were admitted and continued in the community/post-hospitalisation, or, commenced within 30  
18  
19 123 days of hospital discharge; 5) interventions that involved both physical exercises and  
20  
21 124 nutritional interventions (dietary modifications/education/training alone or combined with oral  
22  
23 125 nutrition supplementation); 6) measured frailty with an assessment tool or at least one indicator  
24  
25 126 relevant to frailty (nutritional status, physical function, cognitive function and mood, physical  
26  
27 127 activity level or biomarkers, falls and QoL and/or economic analysis of interventions. Studies  
28  
29 128 were excluded if they described protocols with no pilot outcomes, interventions delivered as a  
30  
31 129 part of a palliative care program, or interventions solely designed to facilitate discharge  
32  
33 130 planning (e.g. telephone support services, providing no pre-frailty or frailty intervention  
34  
35 131 element), recruited participants admitted following a mental health episode.  
36  
37  
38  
39  
40  
41

42 132 *Study selection and data extraction*  
43  
44

45 133 Covidence<sup>22</sup> was used to manage citations for title and abstract, and full-text screening, in  
46  
47 134 duplicate (CH and YS, Supplementary file 1). The reviewers were unblinded to authors,  
48  
49 135 journals and countries of origin. Any disagreement was resolved through discussion or  
50  
51 136 consensus opinion with the other authors. A data extraction form was developed a priori by the  
52  
53 137 research team, such that two researchers (CH and YS) performed data extraction  
54  
55 138 independently, on eligible full-text articles. Where available, the continuous data were  
56  
57 139 extracted as (i) mean change with standard deviation (SD), standard error of mean (SE) or 95%  
58  
59  
60

1  
2  
3 140 confidence interval (CI), or (ii) mean or median values with SD, SE or interquartile range post  
4  
5 141 intervention. If the required data were not reported within a publication (including change in  
6  
7 142 means for outcomes of interest), the authors were emailed to request for it.  
8  
9

### 10 143 *Quality of the studies*

11  
12  
13 144 The risk of bias in the individual studies was assessed by the Revised Cochrane risk-of-bias  
14  
15 145 tool for randomised trials (RoB-2) by two researchers (CH and YS) independently.<sup>23</sup> Any  
16  
17 146 disagreements were resolved by discussion or if required with consensus of a third reviewer.  
18  
19 147 The Cochrane risk-of-bias tool is widely used to assess randomised controlled trials (RCT) for  
20  
21 148 best practice.<sup>24</sup> Studies were given an overall risk-of-bias judgement of low, some concerns or  
22  
23 149 high. Overall risk-of-bias was determined as having “some concerns” if any one of the risks of  
24  
25 150 bias domains was rated as having “some concerns”. Likewise, studies were deemed to have an  
26  
27 151 overall high risk of bias if any one domain had a high risk of bias.  
28  
29  
30  
31

### 32 152 *Data synthesis and statistical analyses*

33  
34  
35 153 Where possible, a meta-analysis was performed; continuous outcome data were pooled and  
36  
37 154 reported as either the difference of means (MD) if the same outcome assessment tools were  
38  
39 155 used or the standardised mean difference (SMD) if different outcome assessment tools were  
40  
41 156 used, and the 95% CI, if there were two or more studies. The SMD is the mean difference when  
42  
43 157 the outcome for each study is standardised to have mean zero and SD=1. Studies presenting  
44  
45 158 SE were converted to SD via the conversion formula.<sup>20</sup> The fixed-effect meta-analyses were  
46  
47 159 carried out with Cochrane Review Manager (RevMan) 5.3.<sup>25</sup> A P value of <0.05 was  
48  
49 160 considered statistically significant. The variability between studies (heterogeneity) was  
50  
51 161 assessed by I<sup>2</sup> and its 95% CI.<sup>26</sup> For studies with unobtainable missing, or incomparable data,  
52  
53 162 results were qualitatively synthesised.  
54  
55  
56  
57  
58

### 59 163 *Patient and public involvement*

1  
2  
3 164 No patients were involved in this study  
4  
5

6 165 **Results**  
7  
8

9 166 *Study selection*  
10  
11

12 167 The flow of studies through the review process is summarised in Figure 1. Twenty articles  
13  
14 168 reporting on 11 studies were eligible for data synthesis and analysis. Three of 11 studies  
15  
16 169 presented results from their cohort across separate publications. Firstly, Villareal et al<sup>27</sup>  
17  
18 170 reported on physical functioning outcomes with biomarker results in the publication of  
19  
20 171 Armamento-Villareal et al.<sup>28</sup> Secondly, Cameron et al<sup>29</sup> reported on frailty and some physical  
21  
22 172 function outcomes, with other physical function outcomes in a secondary publication<sup>30</sup> fall  
23  
24 173 rates<sup>31</sup> and cost-analysis in another.<sup>32</sup> Thirdly, Luger et al<sup>33</sup> reported on frailty and nutritional  
25  
26 174 status, with physical functioning outcomes across two other publications,<sup>34, 35</sup> fall efficacy<sup>36</sup>  
27  
28 175 and quality of life.<sup>37</sup> For clarity, the primary articles that report frailty or physical function  
29  
30 176 outcomes are cited for descriptive data in Tables 1-3 while individual articles are cited for  
31  
32 177 synthesis of outcome results.  
33  
34  
35  
36  
37

38 178 *Study and sample characteristics*  
39  
40

41 179 Details of study characteristics are available in Table 1. Across all studies, a total of 2307  
42  
43 180 participants were investigated. Most studies reported that patients were recruited from hospital  
44  
45 181 wards (n=7)<sup>29, 38-43</sup> while the other four studies<sup>27, 33, 44, 45</sup> included patients that were recruited  
46  
47 182 from hospital wards and community. Seven studies included only frail participants,<sup>27, 29, 40-43, 45</sup>  
48  
49 183 and the remaining four studies<sup>33, 38, 39, 44</sup> included frail, pre-frail and non-frail participants. The  
50  
51 184 Fried frailty phenotype criteria<sup>2</sup> were used most frequently to classify frailty (n=4).<sup>29, 38, 39, 44</sup>  
52  
53 185 with participants considered non-frail, pre-frail or frail if 0, 1-2, 3-5 criteria were present,  
54  
55 186 respectively. Luger et al used the Frailty Instrument for Primary Care of the Survey of Health,  
56  
57 187 Ageing, and Retirement in Europe (SHARE-FI)<sup>33</sup> which integrates components of exhaustion,  
58  
59  
60

1  
2  
3 188 appetite, handgrip strength, walking difficulties and physical activity.<sup>46</sup> Five studies did not  
4  
5 189 report any assessment method to define frailty.<sup>40-43, 45</sup> One study used a combination of three  
6  
7 190 tools – modified Physical Performance Test, the measurement of VO<sub>2</sub> peak, and the Functional  
8  
9 191 Status Questionnaire.<sup>27</sup>

### 12 192 *Risk of bias within individual studies*

13  
14  
15  
16 193 Table 2 outlines the risk of bias in individual studies. One study<sup>27</sup> had a low risk of bias and  
17  
18 194 one study<sup>41</sup> had a high risk of bias (including unblinded secondary outcome assessment and  
19  
20 195 insufficient detail on standard care in control groups across recruitment sites). The other nine  
21  
22 196 studies<sup>29, 33, 38-40, 42-45</sup> were rated as having some concerns overall, of which five could have  
23  
24 197 been improved in  $\geq 1$  domain. The remaining four studies<sup>27, 31, 39, 41</sup> that were rated as having  
25  
26 198 “some concerns” overall, had risk in only one domain with the most common reason being  
27  
28 199 failure to blind intervention/allocated group to participants. Examples of other concerns about  
29  
30 200 risk of bias included: assessors being aware of the group allocation<sup>33</sup> (measurement of  
31  
32 201 outcomes domain); or a lack of information about participants/researcher blinding to group  
33  
34 202 allocation.<sup>27, 29, 44</sup>

### 38 203 *Characteristics of exercise intervention component*

39  
40 204 Characteristics of the exercise interventions used in studies are outlined in Table 3, and  
41  
42 205 included combinations of the following: supervised individual exercises (n=10),<sup>27, 29, 38-45</sup> group  
43  
44 206 exercises (n=3),<sup>27, 41, 45</sup> education including support with resources (digital versatile disc (DVD)  
45  
46 207 or visual aid instruction booklet, n=2),<sup>33, 38</sup> and motivational interviewing using a standardised  
47  
48 208 protocol (n=1).<sup>33</sup> Three studies<sup>39, 42, 44</sup> had inpatient only interventions, five<sup>38, 40, 41, 43, 45</sup> had  
49  
50 209 interventions that extended from inpatient to post-discharge, two<sup>29, 33</sup> studies offered the  
51  
52 210 intervention post-discharge only and one<sup>27</sup> did not report.



1  
2  
3 211 In the majority of studies (n=9), the exercise component was delivered by a physiotherapist.<sup>27,</sup>  
4  
5 212 <sup>38-45</sup> Two studies used trained fitness instructors,<sup>38, 41</sup> and another engaged lay volunteers who  
6  
7  
8 213 received training for the study.<sup>33</sup> All studies included strength exercises as part of their  
9  
10 214 interventions. Three studies described guidance on training intensity based on repetition  
11  
12 215 maximum's (RM) between 40-80%.<sup>27, 41, 44</sup> Other components of exercise programs included  
13  
14 216 aerobic fitness,<sup>27, 29, 38, 39</sup> flexibility,<sup>27, 38, 39</sup> and/or balance.<sup>27, 29, 38, 39</sup> The frequency of  
15  
16 217 interventions ranged from two<sup>33, 38, 41, 44, 45</sup> to five<sup>29, 42</sup> sessions a week, lasting between 20<sup>40, 43,</sup>  
17  
18 218 <sup>44</sup> to 90 minutes<sup>27</sup> each. The duration of exercise intervention varied from six weeks<sup>45</sup> to one  
19  
20 219 year.<sup>27, 29, 38, 41</sup>

#### 220 *Characteristics of nutrition intervention component*

221 Characteristics of the nutritional interventions used in studies, are outlined in Table 3, and  
222 included combinations of the following: nutrition counselling (n=8),<sup>27, 29, 33, 40-43, 45</sup> oral  
223 nutrition and/or multivitamin/mineral supplements (n=7),<sup>27, 29, 39-43</sup> meal programs (n=3),<sup>29, 40,</sup>  
224 <sup>42</sup> self-guided education materials (n=2).<sup>38, 41</sup> The most common combination of nutrition  
225 intervention was counselling with oral nutrition and/or multivitamin/mineral supplements  
226 (n=5).<sup>27, 40, 43, 45</sup> Five of nine nutrition counselling interventions were performed by dietitians.<sup>27,</sup>  
227 <sup>40, 43, 45</sup> Other studies used trained lay volunteers,<sup>33</sup> a researcher/nutrition therapist or did not  
228 specify a skill set for who delivered the counselling.<sup>44</sup>

229 All counselling interventions aimed to achieve adequate dietary targets for energy, protein and  
230 other nutrients. One study on obese frail participants aimed for calorie deficit but ensured that  
231 all achieved 1g/kg/day of protein in the intervention group.<sup>27</sup> The reported frequency of  
232 counselling ranged from twice a week<sup>33, 44</sup> to fortnightly.<sup>40, 43</sup> Oral nutrition supplements (ONS)  
233 were the most common supplements prescribed to intervention.

234 **Table 1.** Characteristics of included studies examining pre-frail or frail hospitalised older adults

| Study                                             | Country       | n   | Mean age                        | Study participants, characteristics                                                                                       | Recruitment site                      | Duration of intervention                  | Follow-up period | Frailty diagnostic tool/criteria used                                                                                      | Reported % of prefrail, frail                  |
|---------------------------------------------------|---------------|-----|---------------------------------|---------------------------------------------------------------------------------------------------------------------------|---------------------------------------|-------------------------------------------|------------------|----------------------------------------------------------------------------------------------------------------------------|------------------------------------------------|
| Arrieta <i>et al</i> , 2019 <sup>35</sup>         | France        | 302 | 76.7 ±5.0                       | Frail, onco-geriatric, older men & women; BMI: 26.1 ±4.6 kg/m <sup>2</sup> (UCG); 26.2 ±4.4 kg/m <sup>2</sup> (IG)        | Acute hospital                        | 1y                                        | 1y, 2y           | Fried frailty phenotype criteria                                                                                           | Non-frail: 73.6%<br>Frail: 26.4%               |
| Rodriguez-Manas <i>et al</i> , 2019 <sup>41</sup> | Spain         | 964 | 78.0 ±5.44                      | Frail older men and women with T2DM; BMI: 29.6 ±5.0 kg/m <sup>2</sup>                                                     | Acute hospitals or primary care sites | 4.5m (exercise), 3.5-4w (nutrition)       | 1y               | Fried frailty phenotype criteria                                                                                           | Pre-frail: 62.2%<br>Frail: 37.8%               |
| Niccoli <i>et al</i> , 2017 <sup>36</sup>         | Canada        | 47  | 81.3 ±1.0                       | Frail older men and women hospitalised patients; BMI: 26.4 ±6.6 kg/m <sup>2</sup> (UCG), 24.2 ±5.2 kg/m <sup>2</sup> (IG) | Acute hospital                        | Average LOS (days): 20.9 (UCG), 26.5 (IG) | Upon discharge   | Fried frailty phenotype criteria                                                                                           | Pre-frail: at least 87.8%<br>Frail: NR         |
| Luger <i>et al</i> , 2016 <sup>*30</sup>          | Austria       | 80  | 82.8 ±8.0                       | Frail older men and women; BMI: 27.2 ±4.3 kg/m <sup>2</sup>                                                               | Acute hospital and community          | 3m                                        | 3m               | SHARE-FI (female>0.315; male: >1.212 points)                                                                               | Non-frail: 1%<br>pre-frail: 35%,<br>frail: 64% |
| Milte <i>et al</i> , 2016 <sup>37</sup>           | Australia     | 175 | 83.0 ±6.2 (UCG), 82.4 ±5.7 (IG) | Frail older men and women post hip fracture, BMI: NR                                                                      | Acute hospital                        | 6m                                        | 6m               | NR                                                                                                                         | Frail: 100% as determined by study authors     |
| Cameron <i>et al</i> , 2013 <sup>†26</sup>        | Australia     | 241 | 83.3 ±5.9                       | Frail older men and women, BMI: 26.4 ±6.0 kg/m <sup>2</sup> (UCG) 26.1 ±5.9 kg/m <sup>2</sup> (IG)                        | Acute hospital                        | 1y                                        | 3m, 1y           | Fried frailty phenotype criteria                                                                                           | Frail: 100% as determined by study authors     |
| Singh <i>et al</i> , 2012 <sup>38</sup>           | Australia     | 124 | 79.3 ± 9.6                      | Frail older men and women; BMI: NR                                                                                        | Acute hospital                        | 1y                                        | 4m, 1y           | NR                                                                                                                         | Frail: 100% as determined by study authors     |
| Villareal <i>et al</i> , 2011 <sup>‡24</sup>      | United States | 107 | 69.3 ±4.1                       | Frail obese older men; BMI: 36.8 ±4.6 kg/m <sup>2</sup>                                                                   | Acute hospital and community          | 1y                                        | 6m, 1y           | ≥2 criteria: Modified PPT score 18–32; VO <sup>2</sup> peak of 11–18 ml/kg; difficulty in performing 2 IADL or 1 basic ADL | Mild-moderate frailty: 100%                    |

|                                                |           |     |               |                                                                                                                   |                              |                          |                       |                                                             |                                            |
|------------------------------------------------|-----------|-----|---------------|-------------------------------------------------------------------------------------------------------------------|------------------------------|--------------------------|-----------------------|-------------------------------------------------------------|--------------------------------------------|
| Azad <i>et al</i> , 2008 <sup>42</sup>         | Canada    | 91  | 74.2 and 75.8 | Frail CHF older women; BMI: NR                                                                                    | Acute hospital and community | 6 weeks                  | 6w, 6m                | Screened by a CHF coordinator, frailty assessment undefined | Frail: 100% as determined by study authors |
| Blanc-Bisson <i>et al</i> , 2008 <sup>39</sup> | France    | 76  | 85.4 ±6.6     | Frail older men and women; BMI: 24.0 ±5.1 kg/m <sup>2</sup>                                                       | Acute hospital               | Until clinical stability | Clinically stable, 1m | NR                                                          | Frail: 100% as determined by study authors |
| Miller <i>et al</i> , 2006 <sup>40</sup>       | Australia | 100 | 83.5 ±2.8     | Frail older men and women with LL fracture; BMI: 22.1 ±4.3 kg/m <sup>2</sup> (ACG), 23.2 ± kg/m <sup>2</sup> (IG) | Acute hospital               | 3m                       | 3m                    | NR                                                          | Frail: 100%                                |

235 Abbreviations: BMI, Body Mass Index; w, Weeks; m, Months; y, Years; VO<sup>2</sup> max, maximal oxygen uptake; PPT, physical performance test; IADL, Instrumental Activities of Daily Living; ADL, Activities of Daily  
 236 Living; SHARE-FI, Survey of Health, Ageing and Retirement in Europe-Frailty Instrument; T2DM, Type 2 Diabetes Mellitus; CHF, Chronic Heart Failure; LL, Lower Limb, LOS, length of stay; IG, Intervention  
 237 group; UCG, Usual care group; ACG, Attention control group; NR, not reported; BMI presented in Mean ±standard deviation  
 238 Multiple articles reported from same study, study chosen to represent other reports from the same study: \*Luger *et al*<sup>31</sup> – Haider *et al* 2017<sup>32</sup>, Winzer *et al* 2019<sup>33</sup>, Kapan *et al* 2017<sup>34</sup>, Kapan *et al* 2017<sup>35</sup>; †Cameron *et al*  
 239 2013<sup>27</sup> – Fairhall *et al* 2012<sup>28</sup>, Fairhall *et al* 2014<sup>29</sup>, Fairhall *et al* 2015<sup>30</sup>; ‡Villareal *et al* 2011<sup>25</sup> – Armamento-Villareal 2016<sup>26</sup>

240 **Table 2. Assessment of methodology quality of included studies using Cochrane Risk of Bias 2.0 tool**

| Study                                             | Cochrane Risk of Bias 2.0 tool assessment domains |                                        |                      |                            |                                  |         |
|---------------------------------------------------|---------------------------------------------------|----------------------------------------|----------------------|----------------------------|----------------------------------|---------|
|                                                   | Randomisation process                             | Deviations from intended interventions | Missing outcome data | Measurement of the outcome | Selection of the reported result | Overall |
| Arrieta <i>et al</i> , 2019 <sup>35</sup>         | +                                                 | ?                                      | ?                    | ?                          | +                                | ?       |
| Rodriguez-Manas <i>et al</i> , 2019 <sup>41</sup> | +                                                 | ?                                      | +                    | ?                          | +                                | ?       |
| Niccoli <i>et al</i> , 2017 <sup>36</sup>         | ?                                                 | ?                                      | +                    | ?                          | +                                | ?       |
| Luger <i>et al</i> , 2016 <sup>*30</sup>          | +                                                 | +                                      | +                    | ?                          | +                                | ?       |
| Milte <i>et al</i> , 2016 <sup>37</sup>           | +                                                 | ?                                      | +                    | +                          | +                                | ?       |
| Cameron <i>et al</i> , 2013 <sup>†26</sup>        | +                                                 | ?                                      | +                    | +                          | +                                | ?       |
| Singh <i>et al</i> , 2012 <sup>38</sup>           | +                                                 | ?                                      | +                    | —                          | +                                | —       |
| Villareal <i>et al</i> , 2011 <sup>‡24</sup>      | +                                                 | +                                      | +                    | +                          | +                                | +       |
| Azad <i>et al</i> , 2008 <sup>42</sup>            | +                                                 | ?                                      | +                    | ?                          | +                                | ?       |
| Blanc-Bisson <i>et al</i> , 2008 <sup>39</sup>    | +                                                 | ?                                      | +                    | ?                          | +                                | ?       |
| Miller <i>et al</i> , 2006 <sup>40</sup>          | +                                                 | ?                                      | +                    | +                          | +                                | ?       |

241 Key: + = Low risk of bias; ? = Some concerns of risk of bias; — = High risk of bias  
 242 <sup>a</sup>Deviations from intended interventions (effect starting and adhering to intervention)  
 243 Multiple articles reported from same study, study chosen to represent other reports from the same study: \*Luger *et al*<sup>31</sup> – Haider *et al* 2017<sup>32</sup>, Winzer *et al* 2019<sup>33</sup>, Kapan *et al* 2017<sup>34</sup>, Kapan *et al* 2017<sup>35</sup>; †Cameron *et al*  
 244 2013<sup>27</sup> – Fairhall *et al* 2012<sup>28</sup>, Fairhall *et al* 2014<sup>29</sup>, Fairhall *et al* 2015<sup>30</sup>; ‡Villareal *et al* 2011<sup>25</sup> – Armamento-Villareal 2016<sup>26</sup>

245 **Table 3. Characteristics of exercise and nutrition intervention and controls of included studies**

| Study                                             | Exercise intervention                                                                                                                                                                                                                                                                                                                                                                                                                                                                                                                                                                        | Nutrition intervention                                                                                                                                                                                                                                                                                   | Control intervention                                                                                                                                                                                                                 |
|---------------------------------------------------|----------------------------------------------------------------------------------------------------------------------------------------------------------------------------------------------------------------------------------------------------------------------------------------------------------------------------------------------------------------------------------------------------------------------------------------------------------------------------------------------------------------------------------------------------------------------------------------------|----------------------------------------------------------------------------------------------------------------------------------------------------------------------------------------------------------------------------------------------------------------------------------------------------------|--------------------------------------------------------------------------------------------------------------------------------------------------------------------------------------------------------------------------------------|
| Arrieta <i>et al</i> , 2019 <sup>35</sup>         | <p><b>Type:</b> <i>Strength</i> – Intensity range from low to high, starting at 10 repetition per exercise (<b>UL, LL</b>) with option of progressive loading</p> <p><i>Aerobic, Flexibility, Balance</i> – intensity individualised</p> <p><b>Frequency:</b> 2 sessions/week, duration per session NR + home exercises duration NR</p> <p><b>Setting:</b> Inpatient (supervised, individual) + post-discharge (unsupervised, individual)</p> <p><b>Additional support reported:</b> Phone consults (by trainer 2x/month for first 6 months then monthly for 1 year); Education resource</p> | <p><b>Self-guided education resource:</b> Provided with French National Nutrition Health Program education booklet - <i>Programme National Nutrition Santé</i> (PNNS)</p>                                                                                                                                | <p><b>Usual care:</b> NR, variable between study sites</p> <p><b>Self-guided education resource:</b> Provided with French National Nutrition Health Program education booklet - <i>Programme National Nutrition Santé</i> (PNNS)</p> |
| Rodriguez-Manas <i>et al</i> , 2019 <sup>41</sup> | <p><b>Type:</b> <i>Strength</i> – 40-80% of estimated 1RM, 8–10 repetitions (<b>LL</b>)</p> <p><b>Frequency:</b> 2-weeks pretraining followed by 16-week program of 2 days/week; 20-30 minutes/sessions</p> <p><b>Setting:</b> Inpatient (supervised, individual)</p>                                                                                                                                                                                                                                                                                                                        | <p><b>Nutrition counselling:</b> 7 educational sessions, each 45 minutes, delivered by a trained researcher or nutritional therapist, twice a week over 3.5-4 weeks. Therapy focused on behavioural change, nutrition optimisation and diabetes.</p>                                                     | <p><b>Usual care:</b> usual health care from local health system and/or general practitioner</p>                                                                                                                                     |
| Niccoli <i>et al</i> , 2017 <sup>36</sup>         | <p><b>Type:</b> <i>Strength, Aerobic, Flexibility, Balance</i> – intensity and target muscle group individualised based on patient's baseline assessment</p> <p><b>Frequency:</b> individualised based on patient's baseline assessment</p> <p><b>Setting:</b> Inpatient (supervised, individual)</p>                                                                                                                                                                                                                                                                                        | <p><b>Supplements:</b> Daily ONS with 24g whey protein per day (<i>9g breakfast, 7.5g at lunch and dinner</i>) in addition to usual diet</p>                                                                                                                                                             | <p><b>Usual care:</b> usual medical care, no whey protein supplementation.</p> <p><b>Individual supervised exercise:</b> Individualised exercises as per intervention.</p>                                                           |
| Luger <i>et al</i> , 2016 <sup>*30</sup>          | <p><b>Type:</b> <i>Strength</i> – 2 sets of 15 repetitions (<b>UL, LL</b>) until muscular exhaustion,</p> <p><b>Frequency:</b> 2x/week, &gt;30 minutes each session</p> <p><b>Setting:</b> Post-discharge (supervised, individual)</p> <p><b>Additional support reported:</b> Physical education (2-3 times/week, 30 minutes each session); Exercise education resource (demonstration DVD); Motivational interviewing.</p>                                                                                                                                                                  | <p><b>Nutrition counselling:</b> Trained, supervised lay volunteers visit twice/week for dietary discussions aimed at achieving adequate energy, protein and other nutrients. Taught how to enrich food with protein, recipes, healthy for life plate which consists of food-cards and a play board.</p> | <p><b>Usual care with attention control:</b> Trained lay "buddies" visit twice a week but doing a portfolio of possible activities (go out, have a chat, and sharing interest), especially cognitive training</p>                    |
| Milte <i>et al</i> , 2016 <sup>37</sup>           | <p><b>Type:</b> <i>Strength, Balance (Otago exercise program)</i> – Intensity and repetitions NR, at the discretion of the treating physiotherapist (<b>LL</b>)</p>                                                                                                                                                                                                                                                                                                                                                                                                                          | <p><b>Nutrition counselling:</b> Individualised nutrition therapy aimed at improving energy and protein</p>                                                                                                                                                                                              | <p><b>Usual care:</b> Usual rehabilitation program recommended during hospitalisation, social visits</p>                                                                                                                             |

|                                              |                                                                                                                                                                                                                                                                                                                                                                                                                                      |                                                                                                                                                                                                                                                                                                                                                                                                                                                                          |                                                                                                                                                                                                                                     |
|----------------------------------------------|--------------------------------------------------------------------------------------------------------------------------------------------------------------------------------------------------------------------------------------------------------------------------------------------------------------------------------------------------------------------------------------------------------------------------------------|--------------------------------------------------------------------------------------------------------------------------------------------------------------------------------------------------------------------------------------------------------------------------------------------------------------------------------------------------------------------------------------------------------------------------------------------------------------------------|-------------------------------------------------------------------------------------------------------------------------------------------------------------------------------------------------------------------------------------|
|                                              | <p><b>Frequency:</b> 3 times/week, 20-30minutes/session for 12 weeks</p> <p><b>Setting:</b> Inpatient (supervised, individual) + post-discharge (supervised, individual)</p>                                                                                                                                                                                                                                                         | <p>intake to meet requirements by dietitian who visits fortnightly.</p> <p><b>Meal program:</b> ordered as deemed necessary by dietitian.</p> <p><b>Supplements:</b> commercial ONS recommended if needed by dietitian</p>                                                                                                                                                                                                                                               | <p>weekly from trial staff and generic nutrition, exercise and falls prevention information</p>                                                                                                                                     |
| Cameron <i>et al</i> , 2013 <sup>†26</sup>   | <p><b>Type:</b> <i>Strength, Balance, Aerobic + WEBB program</i> – intensity and target muscle groups NR</p> <p><b>Frequency:</b> Exercises prescribed 3-5x/week (with 2 sessions for mobility training) for 1 year, supported by up to 10 home visits</p> <p><b>Setting:</b> Post-discharge (supervised, individual) + (unsupervised, individual)</p>                                                                               | <p><b>Nutrition counselling:</b> Clinical evaluation of nutritional intake at home. A series of diet intervention as needed by dietitian.</p> <p><b>Meal program:</b> ordered as deemed necessary by dietitian.</p> <p><b>Supplements:</b> commercial ONS recommended if needed by dietitian</p>                                                                                                                                                                         | <p><b>Usual care:</b> usual health care during hospitalisation and from their general practitioner and community services after discharge</p>                                                                                       |
| Singh <i>et al</i> , 2012 <sup>38</sup>      | <p><b>Type:</b> <i>Strength</i> – 80% of most recent 1RM or RPE &lt;15, 3 sets of 8 repetitions (UL, LL)</p> <p><b>Frequency:</b> 2 sessions/week, session duration NR, over average of 80 sessions in 1 year, start as early as post assessment in hospital or at home.</p> <p><b>Setting:</b> Inpatient (supervised, individual) + (supervised, group-based)</p> <p><b>Additional support reported:</b> Monthly phone consults</p> | <p><b>Nutrition counselling:</b> Counselling on increase in diet quality, frequency NR</p> <p><b>Supplements:</b> ONS +/- dietary advice to increase daily energy (400-600 kcal) and protein (20 g/day) intake.</p> <p>For those calcium or vit-D deficient (52%), 12 months of vit-D orally (1000 IU/day) or calcium (1200 mg/d) and vit-D combination supplement</p> <p><b>Self-guided nutrition resource:</b> Food sources of calcium, vitamin D and sun exposure</p> | <p><b>Usual care:</b> standard service offered for hip fracture in the area health service, including orthogeriatric care, rehabilitation service, other medical and allied health consultation as required, and physiotherapy.</p> |
| Villareal <i>et al</i> , 2011 <sup>‡24</sup> | <p><b>Type:</b> <i>Strength</i> – 65% of 1RM; 8-12 repetitions of each exercise (UL, LL) with options for progression</p> <p><i>Aerobic</i>, ~65% of peak HR with gradual progression to 70-85%</p> <p><i>Flexibility, Balance</i></p> <p><b>Frequency:</b> 90 minutes, 3 sessions/week</p> <p><b>Setting:</b> Inpatient (supervised, group-based)</p>                                                                               | <p><b>Nutrition counselling:</b> prescribed a balanced diet with energy deficit of 500-750 kcal/d from daily energy requirement, 1 g of high-quality protein/kgbw/d. Weekly group consultation with dietitian for adjustments of their caloric intake, goals and behavioral therapy.</p> <p><b>Supplements:</b> 1500 mg of calcium/d day and ~1000 IU vitamin D/d</p>                                                                                                    | <p><b>Usual care:</b> General healthy lifestyle advice</p> <p><b>Supplements:</b> 1500 mg of calcium/d day and ~1000 IU vitamin D/d</p>                                                                                             |
| Azad <i>et al</i> , 2008 <sup>42</sup>       | <p><b>Type:</b> ‘Comprehensive exercise program’; type, intensity and target muscle groups NR</p> <p><b>Frequency:</b> 11 sessions over 6 weeks + NR home exercises</p> <p><b>Setting:</b> Inpatient (supervised, group-based), post-discharge (unsupervised, individual)</p>                                                                                                                                                        | <p><b>Nutrition counselling:</b> 3 sessions of individualized counselling about diet and nutrition in the management of CHF by dietitian</p>                                                                                                                                                                                                                                                                                                                             | <p><b>Usual care:</b> Optimal medical care</p>                                                                                                                                                                                      |

|                                                |                                                                                                                                                                                                                                                                                                                                                       |                                                                                                                                                                                                                                                       |                                                                                                                                                                                                                                                                                              |
|------------------------------------------------|-------------------------------------------------------------------------------------------------------------------------------------------------------------------------------------------------------------------------------------------------------------------------------------------------------------------------------------------------------|-------------------------------------------------------------------------------------------------------------------------------------------------------------------------------------------------------------------------------------------------------|----------------------------------------------------------------------------------------------------------------------------------------------------------------------------------------------------------------------------------------------------------------------------------------------|
| Blanc-Bisson <i>et al</i> , 2008 <sup>39</sup> | <p><b>Type:</b> <i>Strength</i> – intensity (RM) NR, 10 x repetitions each exercise (<b>LB</b>)</p> <p><b>Frequency:</b> 30 minutes, twice/day, five days/week</p> <p><b>Setting:</b> Inpatient (supervised, individual)</p>                                                                                                                          | <p><b>Meal program:</b> Geriatric hospital meals of 1800-2000 kcal/d</p> <p><b>Supplements:</b> 1 daily ONS of 200 kcal and 15g protein</p>                                                                                                           | <p><b>Usual care:</b> From day 3 to 6, patients started to walk with human help with or without technical assistance in the physiotherapy room for three sessions per week until discharge.</p> <p><b>Individual supervised exercise:</b> Physiotherapy continued at home for one month.</p> |
| Miller <i>et al</i> , 2006 <sup>40</sup>       | <p><b>Type:</b> <i>Strength</i> – intensity (RM) NR, 2 sets of 8 repetitions (<b>LL</b>) with progressive loading, at the discretion of the treating physiotherapist</p> <p><b>Frequency:</b> 3 times/week, 20-30minutes/session for 12 weeks</p> <p><b>Setting:</b> Inpatient (supervised, individual) + Post-discharge (supervised, individual)</p> | <p><b>Nutrition counselling:</b> Individualised nutrition therapy by dietitian.</p> <p><b>Supplements:</b> single type of ONS to cover the shortfall between individual estimated energy and protein requirements and actual intake over 42 days.</p> | <p><b>Usual care with attention control group</b> - received tri-weekly visits weeks 1-6, then weekly visits 7-12 to account for the possibility of the attention effect.</p>                                                                                                                |

Abbreviations: *UL*, Upper Limb; *LL*, Lower Limb; *NR*, not reported; *HR*, Heart Rate; *CHF*, Chronic Heart Failure; *ONS*, Oral Nutrition Supplements, *RM*, Repetition Max; *DVD*, Digital Versatile Disc; *WEBB*, Weight-Bearing for Better Balance exercise program is designed to improve mobility, increase physical activity and prevent falls; *Otago exercise program* - series of 17 strength and balance at-home exercises for fall prevention program in frail older adults.

Multiple articles reported from same study, study chosen to represent other reports from the same study: \*Luger *et al*<sup>31</sup> – Haider *et al* 2017<sup>32</sup>, Winzer *et al* 2019<sup>33</sup>, Kapan *et al* 2017<sup>34</sup>, Kapan *et al* 2017<sup>35</sup>; †Cameron *et al* 2013<sup>27</sup> – Fairhall *et al* 2012<sup>28</sup>, Fairhall *et al* 2014<sup>29</sup>, Fairhall *et al* 2015<sup>30</sup>; \*Villareal *et al* 2011<sup>25</sup> – Armamento-Villareal 2016<sup>26</sup>

1  
2  
3 251 group participants (n=7),<sup>27, 39, 40, 42, 43, 45</sup> typically providing 200-300kcal and 12-24g protein  
4  
5 252 per serve with a frequency of consumption up to seven times a week<sup>39, 42</sup> or as prescribed by  
6  
7 253 dietitians<sup>27, 40, 43, 45</sup> to cover any identified deficits between individually estimated energy and  
8  
9 254 protein requirements and actual intake. Calcium and vitamin D were the two most commonly  
10  
11 255 supplemented micronutrients <sup>27, 41</sup> at doses in the range of 1200-1500mg/d and 1000IU/d,  
12  
13 256 respectively. Meal programs were either delivered as inpatient specialised geriatric meals  
14  
15 257 providing 1800-2000kcal/d or home-delivered meal programs.<sup>29, 40, 42</sup>

### 20 258 *Frailty outcomes*

21  
22  
23 259 Data on frailty outcomes were available for quantitative analysis from three studies.<sup>29, 33, 39</sup> The  
24  
25 260 meta-analysis is presented in Figure 2 and suggested that participants who received exercise-  
26  
27 261 nutrition intervention had a greater reduction in frailty score compared to those who received  
28  
29 262 standard care (SMD 0.25; 95% CI 0.03-0.46; P=0.02); no heterogeneity was observed (I<sup>2</sup>=0%;  
30  
31 263 P=0.58).

### 35 264 *Physical functioning outcomes*

#### 38 265 *Short Physical Performance Battery (SPPB)*

39  
40  
41 266 Data on the SPPB were available for quantitative analysis from three studies, <sup>29, 44, 47</sup> with  
42  
43 267 results from the meta-analysis presented in Figure 3. Participants who received exercise-  
44  
45 268 nutrition intervention had a statistically significant improvement in SPPB score, compared to  
46  
47 269 those that received standard care (MD 0.48; 95% CI 0.12-0.84; P=0.008), with moderate  
48  
49 270 heterogeneity<sup>20</sup> observed (I<sup>2</sup> = 52%; P=0.13).<sup>20, 32, 33</sup> The analysis of SPPB components across  
50  
51 271 all studies showed no statistically significant differences in gait speed<sup>29, 39, 44, 47</sup> (MD 0.02; 95%  
52  
53 272 CI -0.02 to 0.06; P=0.31; I<sup>2</sup>=37%, P=0.19) or balance <sup>29, 44, 47</sup> (MD 0.13; 95% CI -0.04 to 0.30;  
54  
55 273 P=0.14; I<sup>2</sup>=0%, P=0.22) between groups. There were significantly greater improvements in  
56  
57 274 chair stand test results<sup>29, 44, 47</sup> in the intervention group as compared to the control (MD 0.26;



1  
2  
3 275 95% CI 0.09-0.43;  $P=0.003$ ;  $I^2 = 23\%$ ,  $P=0.23$ ). Two studies that were not suitable for meta-  
4  
5 276 analysis (as data could not be provided by authors<sup>38</sup> and a different measurement was used<sup>27</sup>)  
6  
7 277 are instead qualitatively described. Arrieta et al reported no significant differences between  
8  
9 278 groups in the percentage of participants who had a  $\geq 1$  point decrease in SPPB score at one and  
10  
11 279 two years ( $P=0.772$ ,  $P=0.057$ , respectively).<sup>38</sup> With use of an alternative measure of physical  
12  
13 280 function (modified physical performance test – includes book lift, put on and take off a coat,  
14  
15 281 pick up a penny, chair rise, turn 360, 50-foot walk, 10-steps of stairs, four flight of stairs and  
16  
17 282 progressive Romberg test), Villareal et al<sup>27</sup> reported a significant improvement in their  
18  
19 283 exercise- nutrition interventions group as compared to exercise only ( $P=0.04$ ), nutrition only  
20  
21 284 ( $P<0.001$ ), or controls.

### 27 Activities of daily living

28  
29 286 Data on activities of daily living (ADL) from three studies<sup>30, 35, 44</sup> underwent meta-analysis,  
30  
31 287 from which participants who received exercise-nutrition intervention were determined to have  
32  
33 288 greater ADL independence post-intervention than those who received standard care (SMD  
34  
35 289 1.06; 95% CI 0.91-1.20;  $P<0.001$ , Figure 3). However, high heterogeneity was observed  
36  
37 290 ( $I^2=96\%$ ,  $P<0.001$ ). As such, additional random effects model was performed (SMD 0.80; 95%  
38  
39 291 CI 0.00-1.60;  $P<0.001$ ; Supplementary file 2). Data from two studies<sup>42, 45</sup> were unavailable to  
40  
41 292 be included the meta-analysis. One study<sup>41</sup> was excluded due to high risk of bias in outcome  
42  
43 293 measurements but reported that basic ADL declined lesser ( $P<0.0001$ ) in the intervention vs  
44  
45 294 control group.

### 51 Muscle strength

52  
53 296 The meta-analysis showed no statistically significant differences in muscle strength between  
54  
55 297 participants who received exercise-nutrition intervention and those that received standard care,  
56  
57 298 when handgrip strength was analysed from three studies<sup>29, 39, 47</sup> (MD 0.46; 95% -0.38 to 0.85;  
58  
59  
60

1  
2  
3 299  $P=0.28$ ;  $I^2=49\%$ ,  $P=0.14$ ), or, when of handgrip and quadriceps strength was combined ( $n=4$   
4  
5 300 studies)<sup>29, 39, 44, 47</sup> using a published methodology<sup>48</sup> (SMD 0.10; 95% CI -0.09 to 0.29;  $P=0.24$ ,  
6  
7 301  $I^2=28\%$ ,  $P=0.30$ ) (Figure 3).  
8  
9

### 10 302 Nutrition, Cognition and Biomarkers outcomes

11  
12  
13 303 Most studies assessed participants' nutritional status at baseline, while only one study<sup>33</sup>  
14 304 assessed it as an outcome. Luger et al reported a 1.54-point improvement in the MNA long  
15  
16 304 assessed it as an outcome. Luger et al reported a 1.54-point improvement in the MNA long  
17  
18 305 form in participants who received exercise-nutrition intervention compared to those who  
19  
20 306 received standard care (95% CI 0.51-2.56,  $P=0.004$ ). Combined exercise-nutrition intervention  
21  
22 307 did not affect cognitive status (mini-mental state examination (MMSE)) or mood (geriatric  
23  
24 308 depression scale (GDS)).<sup>45</sup> Armamento-Villareal et al reported a significant decrease in total  
25  
26 309 and free estradiol in their frail obese older men (attributed to weight loss from lifestyle change  
27  
28 310 rather than the intervention), without a clinically meaningful increase in total or free  
29  
30 311 testosterone levels.<sup>28</sup> In one study that reported C-reactive protein (CRP) levels, this  
31  
32 312 inflammatory marker remained stable in the exercise-nutrition intervention group participants,  
33  
34 313 compared to an increase in the social support control group at the end of 12 weeks ( $P=0.04$ ).<sup>49</sup>  
35  
36  
37  
38  
39

### 40 314 Quality of life and falls

41  
42 315 Three studies<sup>32, 37, 40</sup> that evaluated quality of life did not find a statistically significant  
43  
44 316 improvement in the intervention as compared to the control group though Milte el al<sup>40</sup> found a  
45  
46 317 trend favouring intervention. Fairhall et al<sup>31</sup> found that risk factors related to falls (physical  
47  
48 318 tests as mentioned above) but not rate of falls were reduced while Kapan et al<sup>36</sup> found that a  
49  
50 319 10% reduction in fear of falling as ascertained by the falls efficacy scale.  
51  
52  
53

### 54 320 Economic analyses

55  
56  
57 321 Only two studies examined the cost-effectiveness of their exercise-nutrition intervention.  
58  
59 322 Fairhall et al<sup>32</sup> reported no additional resource cost in terms of medical ( $P=0.87$ ) or nursing and  
60

1  
2  
3 323 health professional appointments (P=0.32). Similarly, Milte et al<sup>40</sup> reported no cost differences  
4  
5 324 between groups (P=0.868).  
6  
7

8 325  
9

## 10 326 **Discussion**

### 11 12 13 327 *Main findings*

14  
15  
16 328 The present systematic review and meta-analysis present updated evidence that suggests  
17  
18 329 exercise with nutrition intervention to be effective on frailty and frailty-related physical  
19  
20 330 outcomes in hospitalised older adult patients. When compared to standard care, combined  
21  
22 331 exercise-nutrition interventions improved frailty status as determined by the Fried Frailty  
23  
24 332 criteria <sup>2</sup> and the SHARE-FI.<sup>46</sup> They also improved physical function according to the SPPB  
25  
26 333 and ADLs. Only one study measured and found significant improvement in nutrition score.<sup>33</sup>  
27  
28 334 The two economic analyses included in this review suggested that combined exercise-nutrition  
29  
30 335 interventions, though more effective, were no more costly than standard care.  
31  
32  
33  
34

35 336 Existing reviews of exercise and nutrition interventions have highlighted heterogeneity in study  
36  
37 337 protocols (including intervention descriptions), which limits potential for quantitative analysis.  
38  
39 338 They have also focussed on community dwelling participants.<sup>50</sup> This study is novel in  
40  
41 339 reviewing a more vulnerable hospitalised population that has not been previously investigated,  
42  
43 340 and specifically targeting pre-frail or frail older adults. However, out of five studies in this  
44  
45 341 review that used a validated frailty assessment tool, only three had assessed frailty at outcome,  
46  
47 342 and available for quantitative analysis. This could be because the frailty phenotype was first  
48  
49 343 described 2001, with a systematic evaluation of frailty tools a decade later.<sup>2, 51</sup> Accordingly,  
50  
51 344 the authors decided to additionally evaluate frailty components such as physical function,  
52  
53 345 nutrition, cognition and biomarkers as baseline and outcome measures. Although not specific  
54  
55  
56  
57  
58  
59  
60

1  
2  
3 346 to frailty, these measures provide insights to the effectiveness of exercise-nutrition  
4  
5 347 interventions on improving various components of frailty and may inform future studies.  
6  
7

8 348 Previous reviews have found mixed results<sup>50</sup> or have concluded that evidence for combined  
9  
10 349 interventions is limited but increasing.<sup>52</sup> Our results concur with RCTs of exercise-nutrition  
11  
12 350 interventions conducted in community dwelling frail older adults. Tarazona-Santabalbina and  
13  
14 351 colleagues found significant improvement in SPPB in participants on a 24-weeks exercise-  
15  
16 352 nutrition intervention as compared to controls in a community dwelling frail population –  
17  
18 353 intervention group  $9.5 \pm 1.8$  vs control group  $7.1 \pm 2.8$ ,  $P=0.007$ .<sup>53</sup> Similarly, Kim et al reported  
19  
20 354 a 12-weeks, community-based study of frail older adults that found SPPB to remain stable in  
21  
22 355 the intervention group, while it decreased by 12.5% (1 point) in controls ( $P=0.039$ ).<sup>54</sup> Our meta-  
23  
24 356 analysis of individual components of the SPPB suggests that the significant improvements in  
25  
26 357 functional muscle strength as represented by the chair stand component of the SPPB may be  
27  
28 358 pivotal to the increase in overall SPPB post intervention, and reflect the functional lower limb  
29  
30 359 strength training focus of the exercise interventions. However, the meta-analysis of handgrip  
31  
32 360 +/- quadriceps strength did not produce a similar trend. Diversity in outcome measures for  
33  
34 361 frailty and frailty-related domains like physical function is a challenge for comparative  
35  
36 362 analyses between studies. Future studies should carefully consider measure responsiveness  
37  
38 363 when selecting outcome tools.  
39  
40  
41  
42  
43  
44  
45

46 364 Nutrition is another important domain within frailty. Yet the majority of studies included in  
47  
48 365 this review only reported nutrition status at baseline, with only one study reporting follow-up  
49  
50 366 nutrition assessment at the end of the intervention.<sup>33</sup> Luger et al described an improvement in  
51  
52 367 nutrition status in a sample of at risk malnourished pre-frail/frail patients (thus likely to benefit  
53  
54 368 most from nutrition therapy). As hospitalised patients have greater energy deficits due to  
55  
56 369 catabolic stress of acute illness, they are a population that requires careful determination of  
57  
58 370 energy/protein requirements and in whom additive effects of nutrition supplementation to  
59  
60

1  
2  
3 371 exercise may have greatest impact on outcomes such as muscle strength.<sup>53</sup> As none of the  
4  
5 372 studies in the present review reported on energy deficits, it is not known whether these patients  
6  
7  
8 373 received adequate replacement. Nutrition supplementation should also not be confused with  
9  
10 374 nutrition or diet modifications. The provision of ONS alone is unlikely to augment diet  
11  
12 375 adequacy as completely as diet modification that involves a wider range of nutrients and non-  
13  
14 376 nutrients<sup>55</sup> especially when led by dietitians.<sup>56, 57</sup>

16  
17  
18 377 For both exercise and nutrition based interventions, an understanding of patient participation  
19  
20 378 dynamics and compliance is required because of how they can impact on effectiveness.<sup>58</sup> Only  
21  
22 379 five studies in this review reported attendance to program/home visits or phone calls or  
23  
24 380 adherence to prescribed exercise/diet or related advice at rates of 50-90% and 70-93% for  
25  
26 381 nutrition and exercise interventions, respectively. Issues with participants resulting in poorer  
27  
28 382 compliance were not reported in these articles, such that the authors recommend that future  
29  
30 383 studies explore barriers and enablers to adherence in multi-modal interventions.

31  
32  
33  
34 384 Cognition is another critical domain in the multidimensional nature of frailty. Exercise<sup>59</sup> and  
35  
36 385 nutrition interventions<sup>60</sup> may have a far reaching, positive effect on cognition in older adults.  
37  
38 386 However, there was no evidence of an impact on cognition from a single study<sup>41</sup> in the present  
39  
40 387 review. This is consistent with a network meta-analysis of 13 RCTs that examined exercise and  
41  
42 388 nutrition interventions in frail older adults.<sup>11</sup> One suggested explanation is that different  
43  
44 389 neuronal mechanisms could result in a misfit between combinatory approaches of nutrition and  
45  
46 390 physical interventions <sup>61</sup> highlighting that more in-depth research is required.<sup>62</sup>

47  
48  
49  
50  
51 391 The economic delivery of new interventions and models of care is important to a range of  
52  
53 392 stakeholders<sup>63</sup> but has been infrequently conducted in previous studies.<sup>50</sup> In this review, only  
54  
55 393 two out of 11 studies included an economic analysis, with the majority of costs coming from  
56  
57 394 delivery of exercise and nutrition support. The types of consumables that were considered in  
58  
59  
60

1  
2  
3 395 analyses included nutrition supplements, ankle/wrist weights, mobility aids and medications.  
4  
5 396 Elements of service provision that were considered included community, rehabilitation,  
6  
7 397 residential and transition care service use, which were often reduced and contributed to the net  
8  
9  
10 398 result. The results of this review support previous findings of beneficial effects on frailty-  
11  
12 399 related outcomes, without increased costs.<sup>50</sup> However, results should be interpreted with  
13  
14 400 caution as omission of other services (such as medication reviews) within a multimodal  
15  
16 401 intervention can impact costings, and there are instances where interventions have not been  
17  
18 402 found to be more-cost effective than usual care.<sup>64</sup> The approach of streamlining and  
19  
20 403 reorganising existing services rather than creating entirely new systems may be preferred.  
21  
22  
23  
24

#### 25 404 *Strength and weakness*

26  
27 405 This study was robust and underwent peer review by an academic librarian. We did not have a  
28  
29 406 language restriction on the search, and we did not find nor include studies in other languages.  
30  
31 407 We chose to use of an updated version of the Cochrane risk of bias tool (RoB 2), which  
32  
33 408 addresses issues of confusion common to its first version.  
34  
35  
36

37 409 By focussing on exercise-nutrition interventions only, this study addresses a gap as identified  
38  
39 410 in a recent review of multi-domain interventions in pre-frail or frail elderly adults, in which  
40  
41 411 some interventions may have been too broad to directly impact frailty, and functional and  
42  
43 412 cognitive status.<sup>52</sup> Multidisciplinary team based approaches remain recommended and are a  
44  
45 413 bedrock of quality standard care; they may also already include goals for exercise and nutrition  
46  
47 414 such that it may be difficult to solely attribute outcomes to a targeted but supplementary  
48  
49 415 exercise-nutrition program. Social relationships affect health behaviour and physical health,<sup>65</sup>  
50  
51 416 such that intervention benefits may in part come from social interactions. Nevertheless, several  
52  
53 417 studies<sup>29, 33, 43</sup> have demonstrated significant improvements even when control participants are  
54  
55 418 provided with the social aspect of an intervention, such that exercise and nutrition are expected  
56  
57  
58  
59  
60

1  
2  
3 419 to improve outcomes independent of social interactions. Among the three studies<sup>29, 33, 39</sup>  
4  
5 420 included in the meta-analysis of reduction in frailty score, one study<sup>33</sup> included patients from  
6  
7 421 community. However, when combined with data from the other two studies,<sup>29, 39</sup> participants  
8  
9 422 recruited from the hospital made up majority (~80%) of the entire cohort in that meta-analysis.  
10  
11  
12

### 13 423 *Implications and future research*

14  
15  
16 424 This review is a useful resource for researchers and multi-disciplinary clinicians who are  
17  
18 425 seeking to generate evidence or evaluate their practices of exercise-nutrition interventions for  
19  
20 426 frail hospitalised older adults. The authors interpretation of the quality of studies in this review  
21  
22 427 is that the evidence base is low, but the inclusion of future studies may change estimates of the  
23  
24 428 intervention effects. While blinding of participants to the intervention is acknowledged to be  
25  
26 429 difficult, future studies should be adequately powered, use allocation concealment with  
27  
28 430 blinding outcome assessors and data analysts at least. Improved reporting of intervention  
29  
30 431 details is also required,<sup>66</sup> which may assist in answering research questions around the optimal  
31  
32 432 duration, dose, modality and timing of intervention(s) across the hospital to community  
33  
34 433 continuum. In the present review, potential beneficial effects of combined interventions could  
35  
36 434 have been negated given the short durations reported by most studies. Thus, future studies may  
37  
38 435 be extended for >6-12 months, or employ principles of chronic condition self-management,<sup>67</sup>  
39  
40 436 to determine delayed improvements and achieve long-lasting sustainability of interventions.  
41  
42 437 The lack of evidence from non-western countries, or low- and middle-income countries  
43  
44 438 indicate the need for research to be conducted in those populations too. There are many ongoing  
45  
46 439 research activities relevant to the scope of this review,<sup>68-71</sup> yet only one has reported plans for  
47  
48 440 economic analysis in the study protocol.<sup>68</sup> Economic evaluations can expand current evidence  
49  
50 441 on the sustainability of incorporating such services within resource-constrained healthcare  
51  
52 442 systems.  
53  
54  
55  
56  
57  
58  
59  
60



1  
2  
3 443 *Conclusion*  
4  
5

6 444 Exercise-nutrition interventions that start while patients are admitted to hospital and continue  
7  
8 445 in the community/post-hospital, or, commence early post discharge, appear to be effective in  
9  
10 446 reducing frailty and some frailty-related physical indicators. Though effective, the quality of  
11  
12 447 the evidence in this review is low as most studies included had some concerns for risk of bias.  
13  
14 448 Given the paucity of high-quality studies on the effectiveness of combined exercise-nutrition  
15  
16 449 interventions on hospitalised frail older adult patients, more robust research that pays attention  
17  
18 450 to effect of assignment to intervention is needed to increase the confidence in results.  
19  
20  
21  
22

23 451 **Acknowledgements**  
24  
25

26 452 The authors would like to thank the librarians at Gus Fraenkel Medical Library, Flinders  
27  
28 453 University for their support with the study.  
29  
30

31 454 **Author Contributions**  
32  
33

34 455 All authors contributed to the conception and design of review. CH and YS read and screened  
35  
36 456 titles and abstract of potentially relevant studies. CH and YS evaluated the selected studies and  
37  
38 457 performed data extraction. CH, MM, AY, CB reviewed the evidence. RW provided statistical  
39  
40 458 expertise on meta-analyses. CH drafted the article and all authors provided critical revisions  
41  
42 459 and final approval of the manuscript. All authors had access to the data in the study and can  
43  
44 460 take responsibility for the integrity of the reported findings. All authors fulfil the ICMJE criteria  
45  
46 461 for authorship.  
47  
48  
49  
50

51 462 **Funding**  
52  
53

54 463 This research received no specific grant from any funding agency in the public, commercial or  
55  
56 464 not-for-profit sectors. CH is supported by the Australian Government Research Training  
57  
58 465 Program scholarship.  
59  
60

1  
2  
3 466 **Competing interests**

4  
5  
6 467 None declared.

7  
8  
9 468 **Patient consent**

10  
11  
12 469 Not required.

13  
14  
15 470 **Data sharing statement**

16  
17  
18 471 Details of the excluded papers are available from the corresponding author upon request.

19  
20  
21 472 **References**

- 22  
23  
24 473 1. Le Cossec C, Perrine AL, Beltzer N, Fuhrman C, Carcaillon-Bentata L. Pre-Frailty,  
25 474 Frailty, and Multimorbidity: Prevalences and Associated Characteristics from Two French  
26 475 National Surveys. *J Nutr Health Aging*. 2016;20(8):860-9.  
27 476 2. Fried LP, Tangen CM, Walston J, Newman AB, Hirsch C, Gottdiener J, et al. Frailty in  
28 477 older adults: evidence for a phenotype. *J Gerontol A Biol Sci Med Sci*. 2001;56(3):M146-56.  
29 478 3. Theou O, Squires E, Mallery K, Lee JS, Fay S, Goldstein J, et al. What do we know  
30 479 about frailty in the acute care setting? A scoping review. *BMC Geriatr*. 2018;18(1):139.  
31 480 4. Considine J, Fox K, Plunkett D, Mecner M, M OR, Darzins P. Factors associated with  
32 481 unplanned readmissions in a major Australian health service. *Aust Health Rev*. 2019;43(1):1-  
33 482 9.  
34 483 5. Sirven N, Rapp T. The cost of frailty in France. *Eur J Health Econ*. 2017;18(2):243-53.  
35 484 6. Thompson MQ, Theou O, Karnon J, Adams RJ, Visvanathan R. Frailty prevalence in  
36 485 Australia: Findings from four pooled Australian cohort studies. *Australas J Ageing*.  
37 486 2018;37(2):155-8.  
38 487 7. Giné-Garriga M, Roqué-Fíguls M, Coll-Planas L, Sitja-Rabert M, Salvà A. Physical  
39 488 exercise interventions for improving performance-based measures of physical function in  
40 489 community-dwelling, frail older adults: a systematic review and meta-analysis. *Arch Phys Med*  
41 490 *Rehabil*. 2014;95(4):753-69. e3.  
42 491 8. Ng TP, Feng L, Nyunt MS, Feng L, Niti M, Tan BY, et al. Nutritional, Physical,  
43 492 Cognitive, and Combination Interventions and Frailty Reversal Among Older Adults: A  
44 493 Randomized Controlled Trial. *Am J Med*. 2015;128(11):1225-36.e1.  
45 494 9. Hsieh TJ, Su SC, Chen CW, Kang YW, Hu MH, Hsu LL, et al. Individualized home-  
46 495 based exercise and nutrition interventions improve frailty in older adults: a randomized  
47 496 controlled trial. *Int J Behav Nutr Phys Act*. 2019;16(1):119.  
48 497 10. Lozano-Montoya I, Correa-Perez A, Abraha I, Soiza RL, Cherubini A, O'Mahony D, et  
49 498 al. Nonpharmacological interventions to treat physical frailty and sarcopenia in older patients:  
50 499 a systematic overview - the SENATOR Project ONTOP Series. *Clin Interv Aging*.  
51 500 2017;12:721-40.  
52 501 11. Abizanda P, López MD, García VP, Estrella JdD, da Silva González Á, Vilardell NB,  
53 502 et al. Effects of an Oral Nutritional Supplementation Plus Physical Exercise Intervention on  
54 503 the Physical Function, Nutritional Status, and Quality of Life in Frail Institutionalized Older  
55 504 Adults: The ACTIVNES Study. *J Am Med Dir Assoc*. 2015;16(5):439.e9-.e16.

12. Negm AM, Kennedy CC, Thabane L, Veroniki AA, Adachi JD, Richardson J, et al. Management of Frailty: A Systematic Review and Network Meta-analysis of Randomized Controlled Trials. *J Am Med Dir Assoc*. 2019;20(10):1190-8.
13. Rozzini R, Sabatini T, Cassinadri A, Boffelli S, Ferri M, Barbisoni P, et al. Relationship between functional loss before hospital admission and mortality in elderly persons with medical illness. *J Gerontol A Biol Sci Med Sci*. 2005;60(9):1180-3.
14. Covinsky KE, Martin GE, Beyth RJ, Justice AC, Sehgal AR, Landefeld CS. The relationship between clinical assessments of nutritional status and adverse outcomes in older hospitalized medical patients. *J Am Geriatr Soc*. 1999;47(5):532-8.
15. Sharma Y, Thompson C, Shari R, Hakendorf P, Miller M. Malnutrition in Acutely Unwell Hospitalized Elderly - "The Skeletons Are Still Rattling in the Hospital Closet". *J Nutr Health Aging*. 2017;21(10):1210-5.
16. Sharma Y, Miller M, Shahi R, Hakendorf P, Horwood C, Thompson C. Malnutrition screening in acutely unwell elderly inpatients. *Br J Nurs*. 2016;25(18):1006-14.
17. Laur CV, McNicholl T, Valaitis R, Keller HH. Malnutrition or frailty? Overlap and evidence gaps in the diagnosis and treatment of frailty and malnutrition. *Applied Physiology, Nutrition & Metabolism*. 2017;42(5):449-58.
18. Rasmussen NM, Belqaid K, Lugnet K, Nielsen AL, Rasmussen HH, Beck AM. Effectiveness of multidisciplinary nutritional support in older hospitalised patients: A systematic review and meta-analyses. *Clinical nutrition ESPEN*. 2018;27:44-52.
19. Wilkinson R, Arensberg ME, Hickson M, Dwyer JT. Frailty Prevention and Treatment: Why Registered Dietitian Nutritionists Need to Take Charge. *J Acad Nutr Diet*. 2017;117(7):1001-9.
20. Higgins JP, Green S. *Cochrane handbook for systematic reviews of interventions: Cochrane book series*. 2008.
21. Moher D, Liberati A, Tetzlaff J, Altman DG. Preferred reporting items for systematic reviews and meta-analyses: the PRISMA statement. *J Clin Epidemiol*. 2009;62(10):1006-12.
22. Innovation VH. *Covidence systematic review software*. Veritas Health Innovation Melbourne, VIC; 2017.
23. Sterne JAC, Savovic J, Page MJ, Elbers RG, Blencowe NS, Boutron I, et al. RoB 2: a revised tool for assessing risk of bias in randomised trials. *BMJ*. 2019;366:l4898.
24. Farrah K, Young K, Tunis MC, Zhao L. Risk of bias tools in systematic reviews of health interventions: an analysis of PROSPERO-registered protocols. *Systematic reviews*. 2019;8(1):280.
25. RevMan. Review manager (revman)[computer program]. version 5.3. The Nordic Cochrane Centre, The Cochrane Collaboration Copenhagen, Denmark; 2014.
26. Higgins JP, Thompson SG, Deeks JJ, Altman DG. Measuring inconsistency in meta-analyses. *BMJ*. 2003;327(7414):557-60.
27. Villareal DT, Chode S, Parimi N, Sinacore DR, Hilton T, Armamento-Villareal R, et al. Weight loss, exercise, or both and physical function in obese older adults. *N Engl J Med*. 2011;364(13):1218-29.
28. Armamento-Villareal R, Aguirre LE, Qualls C, Villareal DT. Effect of lifestyle intervention on the hormonal profile of frail, obese older men. *Journal of Nutrition, Health and Aging*. 2016;20(3):334-40.
29. Cameron ID, Fairhall N, Langron C, Lockwood K, Monaghan N, Aggar C, et al. A multifactorial interdisciplinary intervention reduces frailty in older people: randomized trial. *BMC Med*. 2013;11:65.
30. Fairhall N, Sherrington C, Kurrle SE, Lord SR, Lockwood K, Cameron ID. Effect of a multifactorial interdisciplinary intervention on mobility-related disability in frail older people: randomised controlled trial. *BMC Med*. 2012;10:120.

- 1  
2  
3 555 31. Fairhall N, Sherrington C, Lord SR, Kurrle SE, Langron C, Lockwood K, et al. Effect  
4 556 of a multifactorial, interdisciplinary intervention on risk factors for falls and fall rate in frail  
5 557 older people: a randomised controlled trial. *Age Ageing*. 2014;43(5):616-22.
- 6 558 32. Fairhall N, Sherrington C, Kurrle SE, Lord SR, Lockwood K, Howard K, et al.  
7 559 Economic evaluation of a multifactorial, interdisciplinary intervention versus usual care to  
8 560 reduce frailty in frail older people. *J Am Med Dir Assoc*. 2015;16(1):41-8.
- 9 561 33. Luger E, Dorner TE, Haider S, Kapan A, Lackinger C, Schindler K. Effects of a Home-  
10 562 Based and Volunteer-Administered Physical Training, Nutritional, and Social Support  
11 563 Program on Malnutrition and Frailty in Older Persons: A Randomized Controlled Trial. *J Am*  
12 564 *Med Dir Assoc*. 2016;17(7):671.e9-.e16.
- 13 565 34. Haider S, Dorner TE, Luger E, Kapan A, Titze S, Lackinger C, et al. Impact of a Home-  
14 566 Based Physical and Nutritional Intervention Program Conducted by Lay-Volunteers on  
15 567 Handgrip Strength in Prefrail and Frail Older Adults: A Randomized Control Trial. *PLoS ONE*  
16 568 [Electronic Resource]. 2017;12(1):e0169613.
- 17 569 35. Winzer E, Dorner TE, Grabovac I, Haider S, Kapan A, Lackinger C, et al. Behavior  
18 570 changes by a buddy-style intervention including physical training, and nutritional and social  
19 571 support. *Geriatrics & Gerontology International*. 2019;19(4):323-9.
- 20 572 36. Kapan A, Luger E, Haider S, Titze S, Schindler K, Lackinger C, et al. Fear of falling  
21 573 reduced by a lay led home-based program in frail community-dwelling older adults: A  
22 574 randomised controlled trial. *Arch Gerontol Geriatr*. 2017;68:25-32.
- 23 575 37. Kapan A, Winzer E, Haider S, Titze S, Schindler K, Lackinger C, et al. Impact of a lay-  
24 576 led home-based intervention programme on quality of life in community-dwelling pre-frail and  
25 577 frail older adults: a randomized controlled trial. *BMC Geriatr*. 2017;17:1-11.
- 26 578 38. Arrieta H, Astrugue C, Regueme S, Durrieu J, Maillard A, Rieger A, et al. Effects of a  
27 579 physical activity programme to prevent physical performance decline in onco-geriatric  
28 580 patients: a randomized multicentre trial. *Journal of Cachexia, Sarcopenia and Muscle*.  
29 581 2019;10(2):287-97.
- 30 582 39. Niccoli S, Kolobov A, Bon T, Rafilovich S, Munro H, Tanner K, et al. Whey Protein  
31 583 Supplementation Improves Rehabilitation Outcomes in Hospitalized Geriatric Patients: A  
32 584 Double Blinded, Randomized Controlled Trial. *J Nutr Gerontol Geriatr*. 2017;36(4):149-65.
- 33 585 40. Milte R, Miller MD, Crotty M, Mackintosh S, Thomas S, Cameron ID, et al. COST-  
34 586 EFFECTIVENESS OF INDIVIDUALIZED NUTRITION AND EXERCISE THERAPY FOR  
35 587 REHABILITATION FOLLOWING HIP FRACTURE. *Journal of Rehabilitation Medicine*  
36 588 (Stiftelsen Rehabiliteringsinformation). 2016;48(4):378-85.
- 37 589 41. Singh NA, Quine S, Clemson LM, Williams EJ, Williamson DA, Stavrinou TM, et al.  
38 590 Effects of high-intensity progressive resistance training and targeted multidisciplinary  
39 591 treatment of frailty on mortality and nursing home admissions after hip fracture: a randomized  
40 592 controlled trial. *J Am Med Dir Assoc*. 2012;13(1):24-30.
- 41 593 42. Blanc-Bisson C, Dechamps A, Gouspillou G, Dehail P, Bourdel-Marchasson I. A  
42 594 randomized controlled trial on early physiotherapy intervention versus usual care in acute car  
43 595 unit for elderly: Potential benefits in light of dietary intakes. *Journal of Nutrition, Health and*  
44 596 *Aging*. 2008;12(6):395-9.
- 45 597 43. Miller MD, Crotty M, Whitehead C, Bannerman E, Daniels LA. Nutritional  
46 598 supplementation and resistance training in nutritionally at risk older adults following lower  
47 599 limb fracture: a randomized controlled trial. *Clin Rehabil*. 2006;20(4):311-23.
- 48 600 44. Rodriguez-Manas L, Laosa O, Vellas B, Paolisso G, Topinkova E, Oliva-Moreno J, et  
49 601 al. Effectiveness of a multimodal intervention in functionally impaired older people with type  
50 602 2 diabetes mellitus. *J Cachexia Sarcopenia Muscle*. 2019;10(4):721-33.
- 51 603 45. Azad N, Molnar F, Byszewski A. Lessons learned from a multidisciplinary heart failure  
52 604 clinic for older women: a randomised controlled trial. *Age Ageing*. 2008;37(3):282-7.



- 1  
2  
3 605 46. Romero-Ortuno R, Walsh CD, Lawlor BA, Kenny RA. A frailty instrument for primary  
4 606 care: findings from the Survey of Health, Ageing and Retirement in Europe (SHARE). *BMC*  
5 607 *Geriatr.* 2010;10(1):57.
- 6 608 47. Haider S, Dorner TE, Luger E, Kapan A, Titze S, Lackinger C, et al. Impact of a home-  
8 609 based physical and nutritional intervention program conducted by lay-volunteers on handgrip  
9 610 strength in prefrail and frail older adults: A randomized control trial. *PLoS ONE.* 2017;12(1).
- 10 611 48. Wright J, Baldwin C. Oral nutritional support with or without exercise in the  
11 612 management of malnutrition in nutritionally vulnerable older people: A systematic review and  
12 613 meta-analysis. *Clin Nutr.* 2018;37(6 Pt A):1879-91.
- 13 614 49. Haider S, Grabovac I, Winzer E, Kapan A, Schindler KE, Lackinger C, et al. Change  
15 615 in inflammatory parameters in prefrail and frail persons obtaining physical training and  
16 616 nutritional support provided by lay volunteers: A randomized controlled trial. *PLoS One.*  
17 617 2017;12(10).
- 18 618 50. Apóstolo J, Cooke R, Bobrowicz-Campos E, Santana S, Marcucci M, Cano A, et al.  
19 619 Effectiveness of interventions to prevent pre-frailty and frailty progression in older adults: a  
20 620 systematic review. *JB I database of systematic reviews and implementation reports.*  
21 621 2018;16(1):140.
- 22 622 51. De Vries N, Staal J, Van Ravensberg C, Hobbelen J, Rikkert MO, Nijhuis-Van der  
24 623 Sanden M. Outcome instruments to measure frailty: a systematic review. *Ageing research*  
25 624 *reviews.* 2011;10(1):104-14.
- 26 625 52. Dedeyne L, Deschodt M, Verschueren S, Tournoy J, Gielen E. Effects of multi-domain  
27 626 interventions in (pre)frail elderly on frailty, functional, and cognitive status: a systematic  
28 627 review. *Clin Interv Aging.* 2017;12:873-96.
- 29 628 53. Tarazona-Santabalbina FJ, Gomez-Cabrera MC, Perez-Ros P, Martinez-Arnau FM,  
31 629 Cabo H, Tsaparas K, et al. A Multicomponent Exercise Intervention that Reverses Frailty and  
32 630 Improves Cognition, Emotion, and Social Networking in the Community-Dwelling Frail  
33 631 Elderly: A Randomized Clinical Trial. *J Am Med Dir Assoc.* 2016;17(5):426-33.
- 34 632 54. Kim CO, Lee KR. Preventive effect of protein-energy supplementation on the  
35 633 functional decline of frail older adults with low socioeconomic status: a community-based  
36 634 randomized controlled study. *Journals of Gerontology Series A: Biological Sciences &*  
37 635 *Medical Sciences.* 2013;68(3):309-16.
- 38 636 55. Denison HJ, Cooper C, Sayer AA, Robinson SM. Prevention and optimal management  
40 637 of sarcopenia: a review of combined exercise and nutrition interventions to improve muscle  
41 638 outcomes in older people. *Clin Interv Aging.* 2015;10:859.
- 42 639 56. Munk T, Tolstrup U, Beck AM, Holst M, Rasmussen HH, Hovhannisyanyan K, et al.  
43 640 Individualised dietary counselling for nutritionally at-risk older patients following discharge  
44 641 from acute hospital to home: a systematic review and meta-analysis. *J Hum Nutr Diet.*  
45 642 2016;29(2):196-208.
- 46 643 57. Beck AM, Kjær S, Hansen BS, Storm RL, Thal-Jantzen K, Bitz C. Follow-up home  
48 644 visits with registered dietitians have a positive effect on the functional and nutritional status of  
49 645 geriatric medical patients after discharge: a randomized controlled trial. *Clin Rehabil.*  
50 646 2013;27(6):483-93.
- 51 647 58. Fairhall N, Sherrington C, Cameron ID, Kurrle SE, Lord SR, Lockwood K, et al. A  
52 648 multifactorial intervention for frail older people is more than twice as effective among those  
53 649 who are compliant: complier average causal effect analysis of a randomised trial. *J Physiother.*  
54 650 2017;63(1):40-4.
- 55 651 59. Brisswalter J, Collardeau M, René A. Effects of acute physical exercise characteristics  
56 652 on cognitive performance. *Sports Med.* 2002;32(9):555-66.
- 57 653 60. Klímová B, Vališ M. Nutritional interventions as beneficial strategies to delay cognitive  
58 654 decline in healthy older individuals. *nutrients.* 2018;10(7):905.

- 1  
2  
3 655 61. Schättin A, Baur K, Stutz J, Wolf P, de Bruin ED. Effects of physical exercise combined  
4 656 with nutritional supplements on aging brain related structures and functions: a systematic  
5 657 review. *Front Aging Neurosci.* 2016;8:161.
- 6 658 62. Hardman RJ, Kennedy G, Macpherson H, Scholey AB, Pipingas A. A randomised  
7 659 controlled trial investigating the effects of Mediterranean diet and aerobic exercise on cognition  
8 660 in cognitively healthy older people living independently within aged care facilities: the  
9 661 Lifestyle Intervention in Independent Living Aged Care (LIILAC) study protocol  
10 662 [ACTRN12614001133628]. *Nutr J.* 2015;14(1):53.
- 11 663 63. Drummond MF, Stoddart GL. Economic analysis and clinical trials. *Control Clin*  
12 664 *Trials.* 1984;5(2):115-28.
- 13 665 64. Ruiques FG, Adang EM, Assendelft WJ, Schers HJ, Koopmans RT, Zuidema SU. Cost-  
14 666 effectiveness of a multicomponent primary care program targeting frail elderly people. *BMC*  
15 667 *Fam Pract.* 2018;19(1):62.
- 16 668 65. Umberson D, Karas Montez J. Social relationships and health: A flashpoint for health  
17 669 policy. *J Health Soc Behav.* 2010;51(1\_suppl):S54-S66.
- 18 670 66. Hoffmann TC, Glasziou PP, Boutron I, Milne R, Perera R, Moher D, et al. Better  
19 671 reporting of interventions: template for intervention description and replication (TIDieR)  
20 672 checklist and guide. *BMJ.* 2014;348:g1687.
- 21 673 67. Battersby M, Harris M, Smith D, Reed R, Woodman R. A pragmatic randomized  
22 674 controlled trial of the Flinders Program of chronic condition management in community health  
23 675 care services. *Patient Educ Couns.* 2015;98(11):1367-75.
- 24 676 68. Fairhall N, Kurrle SE, Sherrington C, Lord SR, Lockwood K, John B, et al.  
25 677 Effectiveness of a multifactorial intervention on preventing development of frailty in pre-frail  
26 678 older people: Study protocol for a randomised controlled trial. *BMJ Open.* 2015;5(2).
- 27 679 69. Gonzalez-Sanchez M, Cuesta-Vargas AI, Del Mar Rodriguez Gonzalez M, Caro ED,  
28 680 Nunez GO, Galan-Mercant A, et al. Effectiveness of a muticomponent workout program  
29 681 integrated in an evidence based multimodal program in hyperfrail elderly patients:  
30 682 POWERAGING randomized clinical trial protocol. *BMC Geriatr.* 2019;19(1).
- 31 683 70. Jadczyk AD, Luscombe-Marsh N, Taylor P, Barnard R, Makwana N, Visvanathan R.  
32 684 The EXPRESS Study: Exercise and Protein Effectiveness Supplementation Study supporting  
33 685 autonomy in community dwelling frail older people-study protocol for a randomized controlled  
34 686 pilot and feasibility study. *Pilot & Feasibility Studies.* 2018;4:8.
- 35 687 71. Landi F, Cesari M, Calvani R, Cherubini A, Di Bari M, Bejuit R, et al. The 'Sarcopenia  
36 688 and Physical fRailty IN older people: multi-componenT Treatment strategies' (SPRINTT)  
37 689 randomized controlled trial: design and methods. *Aging Clin Exp Res.* 2017;29(1):89-100.

690

691

692

693

694

695

1  
2  
3 696 **Figure captions**  
4

5  
6 697 Fig.1 Flow diagram illustrating results of the search and study selection process as described  
7  
8 698 in the PRISMA statement  
9

10  
11 699 Fig 2. Meta-analysis of reduction in frailty score for exercise and nutrition intervention vs  
12  
13 700 standard care  
14

15  
16 701 Fig.3 Meta-analyses of Short physical performance battery, Gait speed, Balance test, Chair  
17  
18  
19 702 stand test, Activities of daily living, handgrip strength  
20  
21  
22  
23  
24  
25  
26  
27  
28  
29  
30  
31  
32  
33  
34  
35  
36  
37  
38  
39  
40  
41  
42  
43  
44  
45  
46  
47  
48  
49  
50  
51  
52  
53  
54  
55  
56  
57  
58  
59  
60



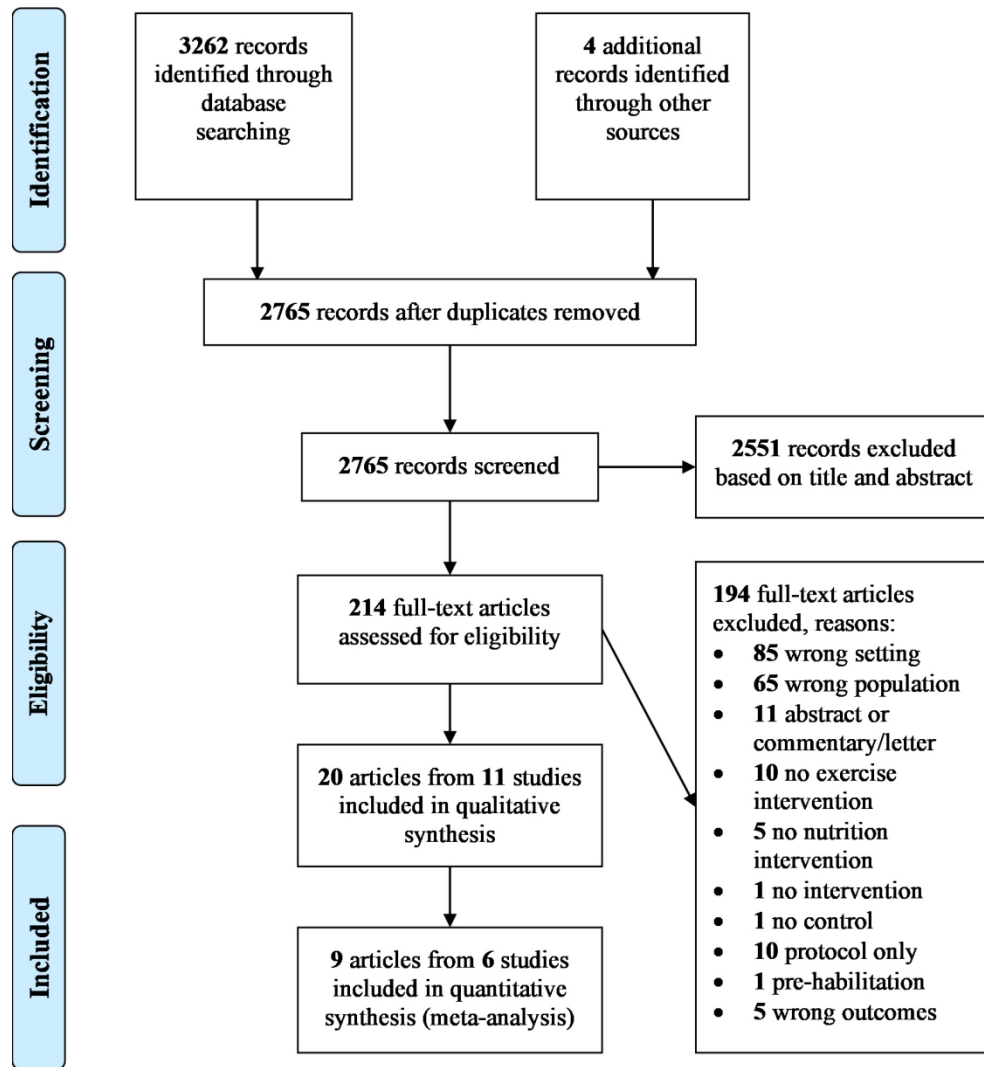

Fig.1 Flow diagram illustrating results of the search and study selection process as described in the PRISMA statement



Fig 2. Meta-analysis of reduction in frailty score for exercise and nutrition intervention vs standard care

268x338mm (300 x 300 DPI)



Fig.3 Meta-analyses of Short physical performance battery, Gait speed, Balance test, Chair stand test, Activities of daily living, handgrip strength

268x338mm (300 x 300 DPI)

## Search Strategy – Medline

| #  | Searches                                                                                                                                                                                                                                                     |
|----|--------------------------------------------------------------------------------------------------------------------------------------------------------------------------------------------------------------------------------------------------------------|
| 1  | "diet, food, AND nutrition"/ or food/ or diet/                                                                                                                                                                                                               |
| 2  | dietary proteins/ or dietary supplements/                                                                                                                                                                                                                    |
| 3  | Nutritional Status/ or Feeding Behavior/                                                                                                                                                                                                                     |
| 4  | Dietitian/                                                                                                                                                                                                                                                   |
| 5  | Nutrition Assessment/ or Nutrition Therapy/                                                                                                                                                                                                                  |
| 6  | ((diet* or nutrition* or food*) adj5 (intervention or program or supplement or educat* or assess* or advic* or counsel* or treat*)).tw,kf.                                                                                                                   |
| 7  | or/1-6                                                                                                                                                                                                                                                       |
| 8  | motor activity/ or exercise/ or muscle strength/ or physical endurance/ or physical fitness.mp.                                                                                                                                                              |
| 9  | Exercise/ or resistance training/                                                                                                                                                                                                                            |
| 10 | (exercis* or "resistance training" or "exercis* therapy" or "muscle stretching exercis*" or "physical exercis*" or "strength train*" or "aerobic exercis*" or hydrotherapy or rehabilitat* or walk* or cycl* or conditioning* or "leg press" or flexib*).mp. |
| 11 | Physiotherapy/                                                                                                                                                                                                                                               |
| 12 | ((exercise* or resistan* or strength) adj5 (intervention or program or educat* or advice* or treat* or train* or rehabilit*)).tw,kf.                                                                                                                         |
| 13 | or/8-12                                                                                                                                                                                                                                                      |
| 14 | frail elderly/ or pre-frail elderly/                                                                                                                                                                                                                         |
| 15 | frail*.mp.                                                                                                                                                                                                                                                   |
| 16 | (functional* adj2 (declin* or impair*) adj3 (aged or aging or elderly or elder* or old* or senior*)).mp.                                                                                                                                                     |
| 17 | (frail* and (geriatric* or gerontolog* or (vulnerable and older))).mp.                                                                                                                                                                                       |
| 18 | (frail* and (aged or aging or elderly or elder* or older or senior*)).mp.                                                                                                                                                                                    |
| 19 | (frail* and (geriatric* or gerontolog* or aging)).mp.                                                                                                                                                                                                        |
| 20 | ("geriatric assess*" or "functionally-impaired elder*").mp.                                                                                                                                                                                                  |
| 21 | 14 or 15 or 16 or 17 or 18 or 19 or 20                                                                                                                                                                                                                       |
| 22 | 7 and 13 and 21                                                                                                                                                                                                                                              |

Translated above strategy for other databases: **CINAHL, Emcare, Scopus, Cochrane, Ageline and PEDro**

Activities of Daily Living – Random Effects Model

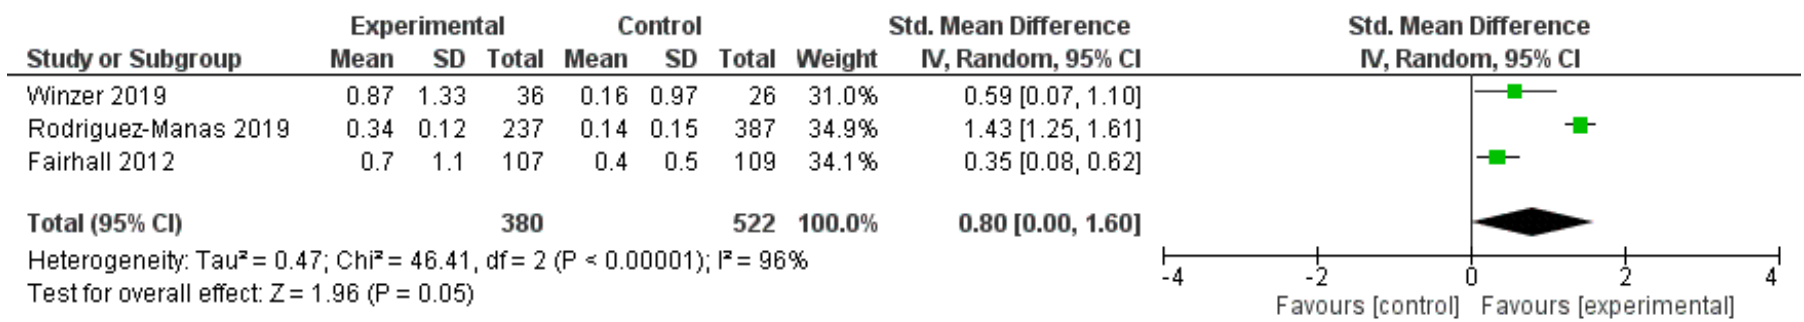

Abbreviations: *CI* confidence interval; *IV* inverse variance; *SD* standard deviation



# PRISMA 2009 Checklist

| Section/topic                      | #  | Checklist item                                                                                                                                                                                                                                                                                              | Reported on page # |
|------------------------------------|----|-------------------------------------------------------------------------------------------------------------------------------------------------------------------------------------------------------------------------------------------------------------------------------------------------------------|--------------------|
| <b>TITLE</b>                       |    |                                                                                                                                                                                                                                                                                                             |                    |
| Title                              | 1  | Identify the report as a systematic review, meta-analysis, or both.                                                                                                                                                                                                                                         | 1                  |
| <b>ABSTRACT</b>                    |    |                                                                                                                                                                                                                                                                                                             |                    |
| Structured summary                 | 2  | Provide a structured summary including, as applicable: background; objectives; data sources; study eligibility criteria, participants, and interventions; study appraisal and synthesis methods; results; limitations; conclusions and implications of key findings; systematic review registration number. | 2                  |
| <b>INTRODUCTION</b>                |    |                                                                                                                                                                                                                                                                                                             |                    |
| Rationale                          | 3  | Describe the rationale for the review in the context of what is already known.                                                                                                                                                                                                                              | 2-5                |
| Objectives                         | 4  | Provide an explicit statement of questions being addressed with reference to participants, interventions, comparisons, outcomes, and study design (PICOS).                                                                                                                                                  | 5                  |
| <b>METHODS</b>                     |    |                                                                                                                                                                                                                                                                                                             |                    |
| Protocol and registration          | 5  | Indicate if a review protocol exists, if and where it can be accessed (e.g., Web address), and, if available, provide registration information including registration number.                                                                                                                               | 5-6                |
| Eligibility criteria               | 6  | Specify study characteristics (e.g., PICOS, length of follow-up) and report characteristics (e.g., years considered, language, publication status) used as criteria for eligibility, giving rationale.                                                                                                      | 6                  |
| Information sources                | 7  | Describe all information sources (e.g., databases with dates of coverage, contact with study authors to identify additional studies) in the search and date last searched.                                                                                                                                  | 6                  |
| Search                             | 8  | Present full electronic search strategy for at least one database, including any limits used, such that it could be repeated.                                                                                                                                                                               | 6                  |
| Study selection                    | 9  | State the process for selecting studies (i.e., screening, eligibility, included in systematic review, and, if applicable, included in the meta-analysis).                                                                                                                                                   | 6                  |
| Data collection process            | 10 | Describe method of data extraction from reports (e.g., piloted forms, independently, in duplicate) and any processes for obtaining and confirming data from investigators.                                                                                                                                  | 6                  |
| Data items                         | 11 | List and define all variables for which data were sought (e.g., PICOS, funding sources) and any assumptions and simplifications made.                                                                                                                                                                       | 6                  |
| Risk of bias in individual studies | 12 | Describe methods used for assessing risk of bias of individual studies (including specification of whether this was done at the study or outcome level), and how this information is to be used in any data synthesis.                                                                                      | 7                  |
| Summary measures                   | 13 | State the principal summary measures (e.g., risk ratio, difference in means).                                                                                                                                                                                                                               | 7                  |
| Synthesis of results               | 14 | Describe the methods of handling data and combining results of studies, if done, including measures of consistency (e.g., I <sup>2</sup> ) for each meta-analysis.                                                                                                                                          | 6-7                |



# PRISMA 2009 Checklist

Page 1 of 2

| Section/topic                 | #  | Checklist item                                                                                                                                                                                           | Reported on page # |
|-------------------------------|----|----------------------------------------------------------------------------------------------------------------------------------------------------------------------------------------------------------|--------------------|
| Risk of bias across studies   | 15 | Specify any assessment of risk of bias that may affect the cumulative evidence (e.g., publication bias, selective reporting within studies).                                                             | 7                  |
| Additional analyses           | 16 | Describe methods of additional analyses (e.g., sensitivity or subgroup analyses, meta-regression), if done, indicating which were pre-specified.                                                         | nil                |
| <b>RESULTS</b>                |    |                                                                                                                                                                                                          |                    |
| Study selection               | 17 | Give numbers of studies screened, assessed for eligibility, and included in the review, with reasons for exclusions at each stage, ideally with a flow diagram.                                          | 7-8, fig 1         |
| Study characteristics         | 18 | For each study, present characteristics for which data were extracted (e.g., study size, PICOS, follow-up period) and provide the citations.                                                             | 7-10               |
| Risk of bias within studies   | 19 | Present data on risk of bias of each study and, if available, any outcome level assessment (see item 12).                                                                                                | 10-11              |
| Results of individual studies | 20 | For all outcomes considered (benefits or harms), present, for each study: (a) simple summary data for each intervention group (b) effect estimates and confidence intervals, ideally with a forest plot. | 12-18              |
| Synthesis of results          | 21 | Present results of each meta-analysis done, including confidence intervals and measures of consistency.                                                                                                  | 12-18, fig. 2 & 3  |
| Risk of bias across studies   | 22 | Present results of any assessment of risk of bias across studies (see Item 15).                                                                                                                          | 8, Fig 2           |
| Additional analysis           | 23 | Give results of additional analyses, if done (e.g., sensitivity or subgroup analyses, meta-regression [see Item 16]).                                                                                    | nil                |
| <b>DISCUSSION</b>             |    |                                                                                                                                                                                                          |                    |
| Summary of evidence           | 24 | Summarize the main findings including the strength of evidence for each main outcome; consider their relevance to key groups (e.g., healthcare providers, users, and policy makers).                     | 18-21              |
| Limitations                   | 25 | Discuss limitations at study and outcome level (e.g., risk of bias), and at review-level (e.g., incomplete retrieval of identified research, reporting bias).                                            | 21-22              |
| Conclusions                   | 26 | Provide a general interpretation of the results in the context of other evidence, and implications for future research.                                                                                  | 22-23              |
| <b>FUNDING</b>                |    |                                                                                                                                                                                                          |                    |
| Funding                       | 27 | Describe sources of funding for the systematic review and other support (e.g., supply of data); role of funders for the systematic review.                                                               | 24                 |

From: Moher D, Liberati A, Tetzlaff J, Altman DG, The PRISMA Group (2009). Preferred Reporting Items for Systematic Reviews and Meta-Analyses: The PRISMA Statement. PLoS Med 6(7): e1000097. doi:10.1371/journal.pmed1000097

For more information, visit: [www.prisma-statement.org](http://www.prisma-statement.org).

For peer review only - <http://bmjopen.bmj.com/site/about/guidelines.xhtml>
